# Supplementary material
Source: ML conference proceedings conference paper supplement (https://openreview.net/forum?id=3WAnGWLpSQ)
Supplement: supplementary_material [file attachment]

---

# Why Does Sharpness-Aware Minimization Generalize Better Than SGD?

---

Anonymous Author(s)

Affiliation

Address

email

## Abstract

1 The challenge of overfitting, in which the model memorizes the training data and  
2 fails to generalize to test data, has become increasingly significant in the training  
3 of large neural networks. To tackle this challenge, Sharpness-Aware Minimization  
4 (SAM) has emerged as a promising training method, which can improve the  
5 generalization of neural networks even in the presence of label noise. However,  
6 a deep understanding of how SAM works, especially in the setting of nonlinear  
7 neural networks and classification tasks, remains largely missing. In this paper,  
8 we fill this gap by demonstrating why SAM generalizes better than Stochastic  
9 Gradient Descent (SGD) for the certain data model and two-layer convolutional  
10 ReLU networks. Our result explains the benefits of SAM, particularly its ability  
11 to prevent noise learning in the early stages, thereby facilitating more effective  
12 learning of weak features. Experiments on both synthetic and real data corroborate  
13 our theory.

## 14 1 Introduction

15 The remarkable performance of deep neural networks has sparked considerable interest in creating  
16 ever-larger deep learning models, while the training process continues to be a critical bottleneck  
17 affecting overall model performance. The training of large models is unstable and difficult due to the  
18 sharpness, non-convexity, and non-smoothness of its loss landscape. In addition, as the number of  
19 model parameters is much larger than the training sample size, the model has the ability to memorize  
20 even randomly labeled data (Zhang et al., 2021), which leads to overfitting. Therefore, although  
21 traditional gradient-based methods like gradient descent (GD) and stochastic gradient descent (SGD)  
22 can achieve generalizable models under certain conditions, these methods may suffer from unstable  
23 training and harmful overfitting in general.

24 To overcome the above challenge, *Sharpness-Aware Minimization* (SAM) (Foret et al., 2020), an  
25 innovative training paradigm, has exhibited significant improvement in model generalization and  
26 become widely adopted in many applications. In contrast to traditional gradient-based methods that  
27 primarily focus on finding a point in the parameter space with a minimal gradient, SAM also pursues  
28 a solution with reduced sharpness, characterized by how rapidly the loss function changes locally.  
29 Despite the empirical success of SAM across numerous tasks (Bahri et al., 2021; Behdin et al., 2022;  
30 Chen et al., 2021; Liu et al., 2022a), the theoretical understanding of this method remains limited.

31 Foret et al. (2020) provided a PAC-Bayes bound on the generalization error of SAM to show that it will  
32 generalize well, while the bound only holds for the infeasible average-direction perturbation instead of  
33 practically used ascend-direction perturbation. Andriushchenko and Flammarion (2022) investigated  
34 the implicit bias of SAM for diagonal linear networks under global convergence assumption. The  
35 oscillations in the trajectory of SAM were explored by Bartlett et al. (2022), leading to a convergence  
36 result for the convex quadratic loss. A concurrent work (Wen et al., 2022) demonstrated that SAM  
37 could locally regularize the eigenvalues of the Hessian of the loss. In the context of least-squares  
38 linear regression, Behdin and Mazumder (2023) found that SAM exhibits lower bias and higher

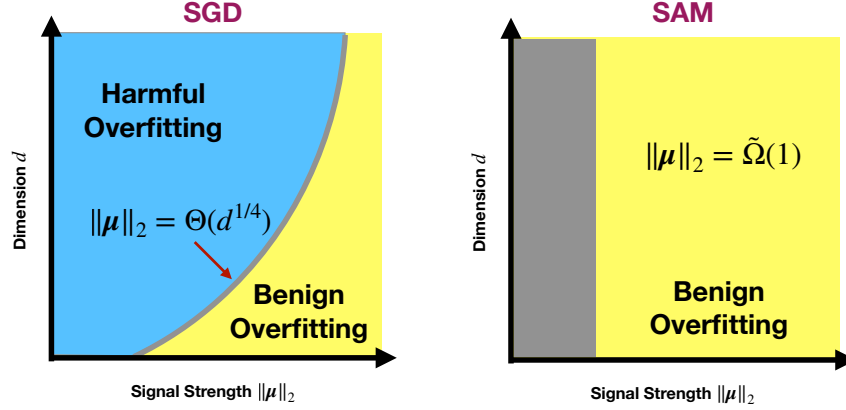

Figure 1: Illustration of the phase transition between benign overfitting and harmful overfitting. The blue region represents the regime under which the overfitted CNN trained by SGD is guaranteed to have a small excess risk, and the yellow region represents the regime under which the excess risk is guaranteed to be a constant order (e.g., greater than 0.1). The gray region is the regime where the excess risk is not characterized.

variance compared to gradient descent. However, all the above analyses of SAM utilize the Hessian information of the loss and require the smoothness property of the loss implicitly. The study for non-smooth neural networks, particularly for the classification task, remains open.

In this paper, our goal is to provide a theoretical basis demonstrating when SAM outperforms SGD. In particular, we consider a data distribution mainly characterized by the signal  $\mu$  and input data dimension  $d$ , and prove the following separation in terms of test error between SGD and SAM.

**Theorem 1.1** (Informal). *Let  $p$  be the strength of the label flipping noise. For any  $\epsilon > 0$ , under certain regularity conditions, with high probability, there exists  $0 \leq t \leq T$  such that the training loss converges to  $\epsilon$ , i.e.,  $L_S(\mathbf{W}^{(t)}) \leq \epsilon$ . Besides,*

1. **For SGD**, when the signal strength  $\|\mu\|_2 \geq \Omega(d^{1/4})$ , we have  $L_{\mathcal{D}}^{0-1}(\mathbf{W}^{(t)}) \leq p + \epsilon$ . When the signal strength  $\|\mu\|_2 \leq O(d^{1/4})$ , we have  $L_{\mathcal{D}}^{0-1}(\mathbf{W}^{(t)}) \geq p + 0.1$ .
2. **For SAM**, provided the signal strength  $\|\mu\|_2 \geq \tilde{\Omega}(1)$ , we have  $L_{\mathcal{D}}^{0-1}(\mathbf{W}^{(t)}) \leq p + \epsilon$ .

Our contributions are summarized as follows:

- We discuss how the loss landscape of two-layer convolutional ReLU networks is different from the smooth loss landscape and thus the current explanation for the success of SAM based on the Hessian information is insufficient for neural networks.
- To understand the limit of SGD, we precisely characterize the conditions under which benign overfitting can occur in training two-layer convolutional ReLU networks with SGD. To the best of our knowledge, this is the first benign overfitting result for neural network trained with mini-batch SGD. We also prove a phase transition phenomenon for SGD, which is illustrated in Figure 1.
- Under the conditions when SGD leads to harmful overfitting, we formally prove that SAM can achieve benign overfitting. Consequently, we establish a rigorous theoretical distinction between SAM and SGD, demonstrating that SAM strictly outperforms SGD in terms of generalization error. Specifically, we show that SAM effectively mitigates noise learning in the early stages of training, enabling neural networks to learn weak features more efficiently.

**Notation.** We use lower case letters, lower case bold face letters, and upper case bold face letters to denote scalars, vectors, and matrices respectively. For a vector  $\mathbf{v} = (v_1, \dots, v_d)^\top$ , we denote by  $\|\mathbf{v}\|_2 := (\sum_{j=1}^d v_j^2)^{1/2}$  its  $l_2$  norm. For two sequence  $\{a_k\}$  and  $\{b_k\}$ , we denote  $a_k = O(b_k)$  if  $|a_k| \leq C|b_k|$  for some absolute constant  $C$ , denote  $a_k = \Omega(b_k)$  if  $b_k = O(a_k)$ , and denote  $a_k = \Theta(b_k)$  if  $a_k = O(b_k)$  and  $a_k = \Omega(b_k)$ . We also denote  $a_k = o(b_k)$  if  $\lim |a_k/b_k| = 0$ . Finally, we use  $\tilde{O}(\cdot)$  and  $\tilde{\Omega}(\cdot)$  to omit logarithmic terms in the notation. We denote the set  $\{1, \dots, N\}$  with  $[N]$ , and denote the set  $\{0, \dots, N-1\}$  with  $\overline{[N]}$ , respectively.

## 2 Preliminaries

### 2.1 Data distribution

Our focus is on binary classification where the label  $y \in \{\pm 1\}$ . We consider the following data model.

**Definition 2.1.** Let  $\mu \in \mathbb{R}^d$  be a fixed vector representing the signal contained in each data point. Each data point  $(\mathbf{x}, y)$  with input  $\mathbf{x} = [\mathbf{x}^{(1)\top}, \mathbf{x}^{(2)\top}, \dots, \mathbf{x}^{(P)\top}]^\top \in \mathbb{R}^{P \times d}$ ,  $\mathbf{x}^{(1)}, \mathbf{x}^{(2)}, \dots, \mathbf{x}^{(P)} \in \mathbb{R}^d$  and label  $y \in \{-1, 1\}$  is generated from a distribution  $\mathcal{D}$  specified as follows:

1. The true label  $\hat{y}$  is generated as a Rademacher random variable, i.e.,  $\mathbb{P}[\hat{y} = 1] = \mathbb{P}[\hat{y} = -1] = 1/2$ . The observed label  $y$  is then generated by flipping  $\hat{y}$  with probability  $p$  where  $p < 1/2$ , i.e.,  $\mathbb{P}[y = \hat{y}] = 1 - p$  and  $\mathbb{P}[y = -\hat{y}] = p$ .
2. A noise vector  $\xi$  is generated from the Gaussian distribution  $\mathcal{N}(\mathbf{0}, \sigma_p^2 \mathbf{I})$ .
3. One of  $\mathbf{x}^{(1)}, \mathbf{x}^{(2)}, \dots, \mathbf{x}^{(P)}$  is randomly selected and then assigned as  $y \cdot \mu$ , which represents the signal, while the others are given by  $\xi$ , which represents noises.

The data distribution in Definition 2.1 has been extensively employed in several previous works (Allen-Zhu and Li, 2020; Jelassi and Li, 2022; Shen et al., 2022; Cao et al., 2022; Kou et al., 2023). When  $P = 2$ , this data distribution aligns with the one analyzed in Kou et al. (2023). This distribution is inspired by image data, where the input is composed of different patches, with only a few patches being relevant to the label. The model has two key vectors: the feature vector and the noise vector. To avoid harmful overfitting, the model must learn the feature vector rather than the noise vector.

### 2.2 Neural Network and Training Loss

To effectively learn the distribution as per Definition 2.1, it is advantageous to utilize a shared weights structure, given that the specific signal patch is not known beforehand. When  $P > n$ , shared weights become indispensable as the location of the signal patch in the test could differ from the location of the signal patch in the training data.

We consider a two-layer convolutional neural network whose filters are applied to the  $P$  patches  $\mathbf{x}_1, \dots, \mathbf{x}_P$  separately, and the second layer parameters of the network are fixed as  $+1/m$  and  $-1/m$  respectively, where  $m$  is the number of convolutional filters. Then the network can be written as  $f(\mathbf{W}, \mathbf{x}) = F_{+1}(\mathbf{W}_{+1}, \mathbf{x}) - F_{-1}(\mathbf{W}_{-1}, \mathbf{x})$ , where  $F_{+1}(\mathbf{W}_{+1}, \mathbf{x})$  and  $F_{-1}(\mathbf{W}_{-1}, \mathbf{x})$  are defined as

$$F_j(\mathbf{W}_j, \mathbf{x}) = m^{-1} \sum_{r=1}^m \sum_{p=1}^P \sigma(\langle \mathbf{w}_{j,r}, \mathbf{x}^{(p)} \rangle). \quad (1)$$

Here we consider ReLU activation function  $\sigma(z) = \mathbf{1}(z \geq 0)$ ,  $\mathbf{w}_{j,r} \in \mathbb{R}^d$  denotes the weight for the  $r$ -th filter, and  $\mathbf{W}_j$  is the collection of model weights associated with  $F_j$  for  $j = \pm 1$ . Denote the training data set by  $\mathcal{S} = \{(\mathbf{x}_i, y_i)\}_{i \in [n]}$ . We train the above CNN model by minimizing the empirical cross-entropy loss function

$$L_{\mathcal{S}}(\mathbf{W}) = n^{-1} \sum_{i \in [n]} \ell(y_i f(\mathbf{W}, \mathbf{x}_i)),$$

where  $\ell(z) = \log(1 + \exp(-z))$  is the logistic loss.

### 2.3 Training Algorithm

**Minibatch Stochastic Gradient Descent.** For epoch  $t$ , the training data set  $\mathcal{S}$  is randomly divided into  $H := n/B$  mini batches  $\mathcal{I}_{t,b}$  with batch size  $B \geq 2$ . The empirical loss for batch  $\mathcal{I}_{t,b}$  is defined as  $L_{\mathcal{I}_{t,b}}(\mathbf{W}) = (1/B) \sum_{i \in \mathcal{I}_{t,b}} \ell(y_i f(\mathbf{W}, \mathbf{x}_i))$ . Then the gradient descent update of the filters in the CNN can be written as

$$\mathbf{w}^{(t,b+1)} = \mathbf{w}^{(t,b)} - \eta \cdot \nabla_{\mathbf{W}} L_{\mathcal{I}_{t,b}}(\mathbf{W}^{(t,b)}), \quad (2)$$

where the gradient of the empirical loss  $\nabla_{\mathbf{W}} L_{\mathcal{I}_{t,b}}$  is the collection of  $\nabla_{\mathbf{w}_{j,r}} L_{\mathcal{I}_{t,b}}$  as follows

$$\begin{aligned} \nabla_{\mathbf{w}_{j,r}} L_{\mathcal{I}_{t,b}}(\mathbf{W}^{(t,b)}) &= \frac{(P-1)}{Bm} \sum_{i \in \mathcal{I}_{t,b}} \ell'_i{}^{(t,b)} \cdot \sigma'(\langle \mathbf{w}_{j,r}^{(t,b)}, \xi_i \rangle) \cdot jy_i \xi_i \\ &\quad + \frac{1}{Bm} \sum_{i \in \mathcal{I}_{t,b}} \ell'_i{}^{(t,b)} \cdot \sigma'(\langle \mathbf{w}_{j,r}^{(t,b)}, \hat{y}_i \mu \rangle) \cdot \hat{y}_i y_i j \mu, \end{aligned} \quad (3)$$

for all  $j \in \{\pm 1\}$  and  $r \in [m]$ . Here we introduce a shorthand notation  $\ell_i^{(t,b)} = \ell'[y_i \cdot f(\mathbf{W}^{(t,b)}, \mathbf{x}_i)]$  and assume the gradient of the ReLU activation function at 0 to be  $\sigma'(0) = 1$  without loss of generality. We use  $(t, b)$  to denote epoch index  $t$  with mini-batch index  $b$  and use  $(t)$  as the shorthand of  $(t, 0)$ . We initialize SGD by random Gaussian, where all entries of  $\mathbf{W}^{(0)}$  are sampled from i.i.d. Gaussian distributions  $\mathcal{N}(0, \sigma_0^2)$ , with  $\sigma_0^2$  being the variance. From (3), we can infer that the loss landscape of the empirical loss is highly non-smooth because the derivative of the ReLU activation function is indicator function  $\mathbf{1}(\cdot)$ , which is not continuous at the origin. In particular, when  $\langle \mathbf{w}_{j,r}^{(t,b)}, \boldsymbol{\xi} \rangle$  is close to zero, even a very small perturbation can greatly change the activation pattern  $\sigma'(\langle \mathbf{w}_{j,r}^{(t,b)}, \boldsymbol{\xi} \rangle)$  and thus change the direction of  $\nabla_{\mathbf{w}_{j,r}} L_{\mathcal{I}_{t,b}}(\mathbf{W}^{(t,b)})$ . This observation prevents the analysis technique based on the Taylor expansion with the Hessian matrix, and calls for a more sophisticated activation pattern analysis.

**Sharpness Aware Minimization.** Given an empirical loss function  $L_S(\mathbf{W})$  with trainable parameter  $\mathbf{W}$ , the idea of SAM is to minimize a perturbed empirical loss at the worst point in the neighborhood ball of  $\mathbf{W}$  to ensure a uniformly low training loss value. In particular, it aims to solve the following optimization problem

$$\min_{\mathbf{W}} L_S^{\text{SAM}}(\mathbf{W}), \quad \text{where} \quad L_S^{\text{SAM}}(\mathbf{W}) := \max_{\|\epsilon\|_2 \leq \tau} L_S(\mathbf{W} + \epsilon), \quad (4)$$

where the hyperparameter  $\tau$  is called the perturbation radius. However, directly optimizing  $L_S^{\text{SAM}}(\mathbf{W})$  is computationally expensive. In practice, people use the following sharpness-aware minimization (SAM) algorithm (Foret et al., 2020; Zheng et al., 2021) to minimize  $L_S^{\text{SAM}}(\mathbf{W})$  efficiently,

$$\mathbf{W}^{(t+1)} = \mathbf{W}^{(t)} - \eta \nabla_{\mathbf{W}} L_S(\mathbf{W} + \hat{\epsilon}), \quad \text{where} \quad \hat{\epsilon} = \tau \cdot \frac{\nabla_{\mathbf{W}} L_S(\mathbf{W})}{\|\nabla_{\mathbf{W}} L_S(\mathbf{W})\|_2}. \quad (5)$$

When applied to SGD in (2), the gradient  $\nabla_{\mathbf{W}} L_S$  in (5) is further replaced by stochastic gradient  $\nabla_{\mathbf{W}} L_{\mathcal{I}_{t,b}}$  (Foret et al., 2020). The detailed algorithm description of SAM is shown in Algorithm 1.

---

**Algorithm 1** Minibatch Sharpness Aware Minimization

---

**Input:** Training set  $\mathcal{S} = \cup_{i=1}^n \{(\mathbf{x}_i, \mathbf{y}_i)\}$ , Batch size  $B$ , step size  $\eta > 0$ , neighborhood size  $\tau > 0$ .

Initialize weights  $\mathbf{W}^{(0)}$ .

**for**  $t = 0, 1, \dots, T - 1$  **do**

Randomly divide the training data set into  $H$  mini batches  $\{\mathcal{I}_{t,b}\}_{b=0}^{H-1}$ .

**for**  $b = 0, 1, \dots, H - 1$  **do**

We calculate the perturbation  $\hat{\epsilon}^{(t,b)} = \tau \frac{\nabla_{\mathbf{W}} L_{\mathcal{I}_{t,b}}(\mathbf{W}^{(t,b)})}{\|\nabla_{\mathbf{W}} L_{\mathcal{I}_{t,b}}(\mathbf{W}^{(t,b)})\|_F}$ .

Update model parameters:  $\mathbf{W}^{(t,b+1)} = \mathbf{W}^{(t,b)} - \eta \nabla_{\mathbf{W}} L_{\mathcal{I}_{t,b}}(\mathbf{W})|_{\mathbf{W}=\mathbf{W}^{(t,b)}+\hat{\epsilon}^{(t,b)}}$ .

**end for**

Update model parameters:  $\mathbf{W}^{(t+1,0)} = \mathbf{W}^{(t,H)}$

**end for**

---

### 3 Result for SGD

In this section, we present our main theoretical results for the CNN trained with SGD. Our results are based on the following conditions on the dimension  $d$ , sample size  $n$ , neural network width  $m$ , initialization scale  $\sigma_0$  and learning rate  $\eta$ .

**Condition 3.1.** Suppose there exists a sufficiently large constant  $C$ , such that the following hold:

1. Dimension  $d$  is sufficiently large:  $d \geq \tilde{\Omega}\left(\max\{nP^{-2}\sigma_p^{-2}\|\boldsymbol{\mu}\|_2^2, n^2, P^{-2}\sigma_p^{-2}Bm\}\right)$ .
2. Training sample size  $n$  and neural network width satisfy  $m, n \geq \tilde{\Omega}(1)$ .
3. The norm of the signal satisfies  $\|\boldsymbol{\mu}\|_2 \geq \tilde{\Omega}(P\sigma_p)$ .
4. The noise rate  $p$  satisfies  $p \leq 1/C$ .
5. The standard deviation of Gaussian initialization  $\sigma_0$  is appropriately chosen such that  $\sigma_0 \leq \tilde{O}\left((\max\{P\sigma_p d/\sqrt{n}, \|\boldsymbol{\mu}\|_2\})^{-1}\right)$ .

142 6. The learning rate  $\eta$  satisfies  $\eta \leq \tilde{O}\left(\left(\max\{P^2\sigma_p^2d^{3/2}/(Bm), P^2\sigma_p^2d/B, n\|\mu\|_2/(\sigma_0B\sqrt{dm}),\right.\right.$   
 143  $\left.\left.nP\sigma_p\|\mu\|_2/(B^2m\epsilon)\right\}\right)^{-1}$ .

144 The conditions imposed on the data dimensions  $d$ , network width  $m$ , and the number of samples  $n$   
 145 ensure adequate overparameterization of the network. Additionally, the condition on the learning  
 146 rate  $\eta$  facilitates efficient learning by our model. Comparable conditions have been established in  
 147 Chatterji and Long (2021); Cao et al. (2022); Frei et al. (2022); Kou et al. (2023). Based on the above  
 148 condition, we first present a set of results on benign/harmful overfitting for SGD in the following  
 149 theorem.

150 **Theorem 3.2** (Benign/harmful overfitting of SGD in training CNNs). *For any  $\epsilon > 0$ , under Condi-*  
 151 *tion 3.1, with probability at least  $1 - \delta$  there exists  $t = \tilde{O}(\eta^{-1}\epsilon^{-1}mnd^{-1}P^{-2}\sigma_p^{-2})$  such that:*

- 152 1. The training loss converges to  $\epsilon$ , i.e.,  $L_S(\mathbf{W}^{(t)}) \leq \epsilon$ .
- 153 2. When  $n\|\mu\|_2^4 \geq C_1dP^4\sigma_p^4$ , the test error  $L_D^{0-1}(\mathbf{W}^{(t)}) \leq p + \epsilon$
- 154 3. When  $n\|\mu\|_2^4 \leq C_3dP^4\sigma_p^4$ , the test error  $L_D^{0-1}(\mathbf{W}^{(t)}) \geq p + 0.1$ .

155 Theorem 3.2 reveals a sharp phase transition between benign and harmful overfitting for CNN trained  
 156 with SGD. This transition is determined by the relative scale of the signal strength and the data  
 157 dimension. Specifically, if the signal is relatively large such that  $n\|\mu\|_2^4 \geq C_1d(P-1)^4\sigma_p^4$ , the  
 158 model can efficiently learn the signal. As a result, the test error decreases, approaching the Bayesian  
 159 optimal risk  $p$ , although the presence of label flipping noise prevents the test error from reaching zero.  
 160 Conversely, when the condition  $n\|\mu\|_2^4 \leq C_3d(P-1)^4\sigma_p^4$  holds, the test error fails to approach the  
 161 Bayesian optimal risk. This phase transition is empirically illustrated in Figure 2. In both scenarios,  
 162 the model is capable of fitting the training data thoroughly, even for examples with flipped labels.  
 163 This finding aligns with longstanding empirical observations.

164 The negative result of SGD, which encompasses the third point of Theorem 3.2 and the high test  
 165 error observed in Figure 2, suggests that the signal strength needs to scale with the data dimension to  
 166 enable benign overfitting. This constraint substantially undermines the efficiency of SGD, particularly  
 167 when dealing with high-dimensional data. A significant part of this limitation stems from the fact that  
 168 SGD does not inhibit the model from learning noise, leading to a comparable rate of signal and noise  
 169 learning during iterative model parameter updates. This inherent limitation of SGD is effectively  
 170 addressed by SAM, as we will discuss later in Section 4.

### 171 3.1 Analysis of Mini-Batch SGD

172 In contrast to GD, SGD does not utilize all the training data at each iteration. Consequently, different  
 173 samples may contribute to parameters differently, leading to possible unbalancing in parameters. To  
 174 analyze SGD, we extend the signal-noise decomposition technique developed by Kou et al. (2023);  
 175 Cao et al. (2022) for GD, which in our case is formally defined as:

176 **Definition 3.3.** Let  $\mathbf{w}_{j,r}^{(t,b)}$  for  $j \in \{\pm 1\}$ ,  $r \in [m]$  be the convolution filters of the CNN at the  $b$ -th  
 177 batch of  $t$ -th epoch of gradient descent. Then there exist unique coefficients  $\gamma_{j,r}^{(t,b)}$  and  $\rho_{j,r,i}^{(t,b)}$  such that

$$\mathbf{w}_{j,r}^{(t,b)} = \mathbf{w}_{j,r}^{(0,0)} + j \cdot \gamma_{j,r}^{(t,b)} \cdot \|\mu\|_2^{-2} \cdot \mu + \frac{1}{P-1} \sum_{i=1}^n \rho_{j,r,i}^{(t,b)} \cdot \|\xi_i\|_2^{-2} \cdot \xi_i.$$

178 Further denote  $\bar{\rho}_{j,r,i}^{(t,b)} := \rho_{j,r,i}^{(t,b)} \mathbb{1}(\rho_{j,r,i}^{(t,b)} \geq 0)$ ,  $\rho_{j,r,i}^{(t,b)} := \rho_{j,r,i}^{(t,b)} \mathbb{1}(\rho_{j,r,i}^{(t,b)} \leq 0)$ . Then

$$\mathbf{w}_{j,r}^{(t,b)} = \mathbf{w}_{j,r}^{(0,0)} + j\gamma_{j,r}^{(t,b)}\|\mu\|_2^{-2}\mu + \frac{1}{P-1} \sum_{i=1}^n \bar{\rho}_{j,r,i}^{(t,b)}\|\xi_i\|_2^{-2}\xi_i + \frac{1}{P-1} \sum_{i=1}^n \rho_{j,r,i}^{(t,b)}\|\xi_i\|_2^{-2}\xi_i. \quad (6)$$

179 The normalization terms  $\frac{1}{P-1}$ ,  $\|\mu\|_2^{-2}$ , and  $\|\xi_i\|_2^{-2}$  ensure that  $\gamma_{j,r}^{(t,b)} \approx \langle \mathbf{w}_{j,r}^{(t,b)}, \mu \rangle$  and  $\rho_{j,r,i}^{(t,b)} \approx$   
 180  $(P-1)\langle \mathbf{w}_{j,r}^{(t,b)}, \xi_i \rangle$ . Through signal-noise decomposition, we characterize the learning progress of

181 signal  $\mu$  using  $\gamma_{j,r}^{(t,b)}$ , and the learning progress of noise using  $\rho_{j,r}^{(t,b)}$ . This decomposition turns the  
 182 analysis of SGD updates into the analysis of signal noise coefficients. Kou et al. (2023) extend this  
 183 technique to the ReLU activation function as well as in the presence of label flipping noise. However,  
 184 mini-batch SGD updates amplify the complications introduced by label flipping noise, making it  
 185 more difficult to ensure learning. We have developed advanced methods for coefficient balancing  
 186 and activation pattern analysis. These techniques will be thoroughly discussed in the sequel. The  
 187 progress of signal learning is characterized by  $\gamma_{j,r}^{(t,b)}$ , whose update rule is as follows:

$$\begin{aligned} \gamma_{j,r}^{(t,b+1)} = & \gamma_{j,r}^{(t,b)} - \frac{\eta}{Bm} \cdot \left[ \sum_{i \in \mathcal{I}_{t,b} \cap S_+} \ell_i'^{(t,b)} \sigma'(\langle \mathbf{w}_{j,r}^{(t,b)}, \hat{y}_i \cdot \mu \rangle) \right. \\ & \left. - \sum_{i \in \mathcal{I}_{t,b} \cap S_-} \ell_i'^{(t,b)} \sigma'(\langle \mathbf{w}_{j,r}^{(t,b)}, \hat{y}_i \cdot \mu \rangle) \right] \cdot \|\mu\|_2^2. \end{aligned} \quad (7)$$

188 Here,  $\mathcal{I}_{t,b}$  represents the indices of samples in batch  $b$  of epoch  $t$ ,  $S_+$  denotes the set of clean samples  
 189 where  $y_i = \hat{y}_i$ , and  $S_-$  represents the set of noisy samples where  $y_i = -\hat{y}_i$ . The updates of  $\gamma_{j,r}^{(t,b)}$  en-  
 190 tail an increase due to clear sample learning, offset by a decrease attributable to noisy sample learning.  
 191 Both empirical and theoretical analyses have demonstrated that overparametrization allows the model  
 192 to fit even random labels. This occurs when the negative term  $\sum_{i \in \mathcal{I}_{t,b} \cap S_-} \ell_i'^{(t,b)} \sigma'(\langle \mathbf{w}_{j,r}^{(t,b)}, y_i \cdot \mu \rangle)$   
 193 primarily drives model learning. Such unfavorable scenarios could be attributed to two possible fac-  
 194 tors. Firstly, the gradient of the loss  $\ell_i'^{(t,b)}$  might be significantly higher for noisy samples compared  
 195 to clean samples. Secondly, during certain epochs, the majority of samples may be noisy, meaning  
 196 that  $\mathcal{I}_{t,b} \cap S_-$  significantly outnumbers  $\mathcal{I}_{t,b} \cap S_+$ .

197 To deal with the first factor, we have to control the ratio of the loss gradient with regard to different  
 198 samples, as depicted in Equation (8). Given that noisy samples may overwhelm a single batch, we  
 199 impose an additional requirement: the ratio of the loss gradient must be controllable across different  
 200 batches within a single epoch.

$$\ell_i'^{(t,b_1)} / \ell_k'^{(t,b_2)} \leq C_2. \quad (8)$$

201 As  $\ell'(z_1) / \ell'(z_2) \approx \exp(z_2 - z_1)$ , we can upper bound  $\ell_i'^{(t,b_1)} / \ell_k'^{(t,b_2)}$  with  $y_i \cdot f(\mathbf{W}^{(t,b_1)}, \mathbf{x}_i) -$   
 202  $y_k \cdot f(\mathbf{W}^{(t,b_2)}, \mathbf{x}_k)$ . And  $y_i \cdot f(\mathbf{W}^{(t,b_1)}, \mathbf{x}_i) - y_k \cdot f(\mathbf{W}^{(t,b_2)}, \mathbf{x}_k)$  can be further upper bounded by  
 203  $\sum_r \bar{\rho}_{y_i,r,i}^{(t,b_1)} - \sum_r \bar{\rho}_{y_i,r,k}^{(t,b_2)}$  with a small error. Therefore, Equation (8) is equivalent to the symmetry of  
 204  $\bar{\rho}_{y_i,r,i}^{(t,b)} : \sum_{r=1}^m \bar{\rho}_{y_i,r,i}^{(t,b_1)} - \sum_{r=1}^m \bar{\rho}_{y_k,r,k}^{(t,b_2)} \leq \kappa$

205 However, achieving this upper bound turns out to be challenging, since the updates to  $\bar{\rho}_{j,r,i}^{(t,b)}$  are not  
 206 evenly distributed across the epoch. Each update utilizes only a portion of the samples, meaning  
 207 that symmetry can only be fully achieved once an entire epoch has been processed. Consequently,  
 208 we have to first reconstruct the symmetry of  $\bar{\rho}_{y_i,r,i}^{(t,b)}$  at the epoch level, and then control the maximal  
 209 asymmetry within one epoch. The full batch update rule is established as follows:

$$\begin{aligned} \sum_{r=1}^m [\bar{\rho}_{y_i,r,i}^{(t+1,0)} - \bar{\rho}_{y_k,r,k}^{(t+1,0)}] = & \sum_{r=1}^m [\bar{\rho}_{y_i,r,i}^{(t,0)} - \bar{\rho}_{y_k,r,k}^{(t,0)}] - \frac{\eta(P-1)^2}{Bm} \cdot \left( |\tilde{S}_i^{(t,b_i^{(t)})}| \ell_i'^{(t,b_i^{(t)})} \cdot \|\xi_i\|_2^2 \right. \\ & \left. - |\tilde{S}_k^{(t,b_k^{(t)})}| \ell_k'^{(t,b_k^{(t)})} \cdot \|\xi_k\|_2^2 \right), \end{aligned} \quad (9)$$

210 Here,  $b_i^{(t)}$  denotes the batch to which sample  $i$  belongs in epoch  $t$ , and  $\tilde{S}_i^{(t,b_i^{(t)})}$  represents the  
 211 parameters that learn  $\xi_i$  at epoch  $t$ , as formally defined in Equation (10). Therefore, the update  
 212 of  $\sum_{r=1}^m [\bar{\rho}_{y_i,r,i}^{(t,0)} - \bar{\rho}_{y_k,r,k}^{(t,0)}]$  is indeed characterized by the activation pattern of parameters, which  
 213 serves as the key technique for analyzing the full epoch update of  $\sum_{r=1}^m [\bar{\rho}_{y_i,r,i}^{(t,0)} - \bar{\rho}_{y_k,r,k}^{(t,0)}]$ . However,  
 214 analyzing the pattern of  $S_i^{(t,b)}$  directly is challenging since  $\langle \mathbf{w}_{y_i,r}^{(t,b)}, \xi_i \rangle$  fluctuates in batches without  
 215 sample  $i$ . Therefore, we introduce the set series  $S_i^{(t,b)}$  as the activation pattern with certain threshold  
 216 as follows:

$$S_i^{(t,b)} := \{r : \langle \mathbf{w}_{y_i,r}^{(t,b)}, \xi_i \rangle > \sigma_0 \sigma_p \sqrt{d} / \sqrt{2}\}; \quad \tilde{S}_i^{(t,b)} := \{r : \langle \mathbf{w}_{y_i,r}^{(t,b)}, \xi_i \rangle > 0\} \quad (10)$$

217 The following lemma suggests that the set of activated parameters  $S_i^{(t,0)}$  is a non-decreasing sequence  
 218 with regards to  $t$ , and the set of plain activated parameters  $\tilde{S}_i^{(t,b)}$  always include  $S_i^{(t,0)}$ . Consequently,  
 219  $S_i^{(0,0)}$  is always included in  $\tilde{S}_i^{(t,b)}$ , guaranteeing that  $\xi_i$  can always be learned by some parameter.  
 220 And this further makes sure  $\bar{\rho}_{y_i, r, i}^{(t,b)}$  is symmetric, as well as  $\ell_i'^{(t,b_1)}/\ell_k'^{(t,b_2)} \leq C_2$ .  
 221 **Lemma 3.4.** *For all  $t \in [0, T^*]$  and  $b < H$ , we have*

$$S_i^{(t-1,0)} \subseteq S_i^{(t,0)} \subseteq \tilde{S}_i^{(t,b)}. \quad (11)$$

222 As we have mentioned above, if noisy samples outnumber clean samples,  $\gamma_{j,r}^{(t,b)}$  may also decrease.  
 223 To deal with such scenario, we establish a two-stage analysis of  $\gamma_{j,r}^{(t,b)}$  progress. In the first stage,  
 224 when  $-\ell_i'$  is lower bounded by a positive constant, we prove that there are enough batches containing  
 225 sufficient clear samples. This is characterized by the following high-probability event.

226 **Lemma 3.5.** *(Informal) With high probability, for all  $T \in [\tilde{O}(1), T^*]$ , there exist at least  $c_1 \cdot T$   
 227 epoches among  $[0, T]$ , such that at least  $c_2 \cdot H$  batches in each of these epoches satisfying the  
 228 following condition:*

$$|S_+ \cap S_y \cap \mathcal{I}_{t,b}| \in [0.25B, 0.75B]. \quad (12)$$

229 After the first stage of  $T = \Theta(\eta^{-1}m(P-1)^{-2}\sigma_p^{-2}d^{-1})$  epochs, we would have  $\gamma_{j,r}^{(T,0)} =$   
 230  $\Omega\left(n \frac{\|\mu\|_2^2}{(P-1)^2\sigma_p^2 d}\right)$ . The scale of  $\gamma_{j,r}^{(T,0)}$  guarantees that  $\langle \mathbf{w}_{j,r}^{(t,b)}, \mu \rangle$  remains resistant to intra-epoch  
 231 fluctuations. Consequently, this implies the sign of  $\langle \mathbf{w}_{j,r}^{(t,b)}, \mu \rangle$  will persist unchanged throughout the  
 232 entire epoch. Without loss of generality, we would suppose that  $\langle \mathbf{w}_{j,r}^{(t,b)}, \mu \rangle > 0$ , then the update of  
 233  $\gamma_{j,r}^{(t,b)}$  can be written as follows:

$$\gamma_{j,r}^{(t+1,0)} = \gamma_{j,r}^{(t,0)} + \frac{\eta}{Bm} \cdot \left[ \min_{i \in \mathcal{I}_{t,b,b}} |\ell_i'^{(t,b)}| |S_+ \cap S_1| - \max_{i \in \mathcal{I}_{t,b,b}} |\ell_i'^{(t,b)}| |S_- \cap S_{-1}| \right] \cdot \|\mu\|_2^2. \quad (13)$$

234 As we have proved the balancing of logits  $\ell_i'^{(t,b)}$  across batches, the progress analysis of  $\gamma_{j,r}^{(t+1,0)}$  is  
 235 established to characterize the signal learning of SGD.

## 236 4 Result for SAM

237 In this section, we present the positive results for SAM in the following theorem.

238 **Theorem 4.1.** *Choose  $\tau = \Theta\left(\frac{m\sqrt{B}}{P\sigma_p\sqrt{d}}\right)$ , we train neural networks with SAM for  
 239  $O\left(\eta^{-1}\epsilon^{-1}B^{-1}mn\|\mu\|_2^{-2}\right)$  iteration. Then we can train the model with SGD, for any  $\epsilon > 0$ ,  
 240 under Condition 3.1 with  $\sigma_0 = \tilde{\Theta}(P^{-1}\sigma_p^{-1}d^{-1/2})$ , with probability at least  $1 - \delta$  there exists  
 241  $t = \tilde{O}\left(\eta^{-1}\epsilon^{-1}B^{-1}mnd^{-1}P^{-2}\sigma_p^{-2}\right)$  such that:*

- 242 1. The training loss converges to  $\epsilon$ , i.e.,  $L_S(\mathbf{W}^{(t)}) \leq \epsilon$ .
- 243 2. The test error  $L_D^{0-1}(\mathbf{W}^{(t)}) \leq p + \epsilon$ .

244 In contrast to Theorem 3.2, Theorem 4.1 demonstrates that CNNs trained by SAM exhibit benign  
 245 overfitting under much milder conditions. This condition is almost dimension-free, as opposed to the  
 246 threshold of  $\|\mu\|_2^4 \geq \tilde{\Omega}((d/n)P^4\sigma_p^4)$  for CNNs trained by SGD. The discrepancy in the thresholds  
 247 can be observed in Figure 1. This difference is because SAM introduces a perturbation during the  
 248 model parameter update process, which effectively prevents the early-stage memorization of noise by  
 249 deactivating the corresponding neurons.

### 250 4.1 Noise Memorization Prevention

251 In this subsection, we will show how SAM can prevent noise memorization by changing the activation  
 252 pattern of the neurons. For SAM, we have the following update rule of decomposition coefficients  
 253  $\gamma_{j,r}^{(t,b)}, \bar{\rho}_{j,r,i}^{(t,b)}, \rho_{j,r,i}^{(t,b)}$ :

254 **Lemma 4.2.** *The coefficients  $\gamma_{j,r}^{(t,b)}$ ,  $\bar{\rho}_{j,r,i}^{(t,b)}$ ,  $\rho_{j,r,i}^{(t,b)}$  defined in Definition 3.3 satisfy the following iterative*  
 255 *equations for all  $r \in [m]$ ,  $j \in \{\pm 1\}$  and  $i \in [n]$ :*

$$\begin{aligned} \gamma_{j,r}^{(0,0)}, \bar{\rho}_{j,r,i}^{(0,0)}, \rho_{j,r,i}^{(0,0)} &= 0, \\ \gamma_{j,r}^{(t,b+1)} &= \gamma_{j,r}^{(t,b)} - \frac{\eta}{Bm} \cdot \left[ \sum_{i \in \mathcal{I}_{t,b} \cap S_+} \ell'_i{}^{(t,b)} \sigma'(\langle \mathbf{w}_{j,r}^{(t,b)} + \hat{\epsilon}_{j,r}^{(t,b)}, \hat{y}_i \cdot \boldsymbol{\mu} \rangle) \right. \\ &\quad \left. - \sum_{i \in \mathcal{I}_{t,b} \cap S_-} \ell'_i{}^{(t,b)} \sigma'(\langle \mathbf{w}_{j,r}^{(t,b)} + \hat{\epsilon}_{j,r}^{(t,b)}, \hat{y}_i \cdot \boldsymbol{\mu} \rangle) \right] \cdot \|\boldsymbol{\mu}\|_2^2, \\ \bar{\rho}_{j,r,i}^{(t,b+1)} &= \bar{\rho}_{j,r,i}^{(t,b)} - \frac{\eta(P-1)^2}{Bm} \cdot \ell'_i{}^{(t,b)} \cdot \sigma'(\langle \mathbf{w}_{j,r}^{(t,b)} + \hat{\epsilon}_{j,r}^{(t,b)}, \boldsymbol{\xi}_i \rangle) \cdot \|\boldsymbol{\xi}_i\|_2^2 \cdot \mathbb{1}(y_i = j) \mathbb{1}(i \in \mathcal{I}_{t,b}), \\ \rho_{j,r,i}^{(t,b+1)} &= \rho_{j,r,i}^{(t,b)} + \frac{\eta(P-1)^2}{Bm} \cdot \ell'_i{}^{(t,b)} \cdot \sigma'(\langle \mathbf{w}_{j,r}^{(t,b)} + \hat{\epsilon}_{j,r}^{(t,b)}, \boldsymbol{\xi}_i \rangle) \cdot \|\boldsymbol{\xi}_i\|_2^2 \cdot \mathbb{1}(y_i = -j) \mathbb{1}(i \in \mathcal{I}_{t,b}), \end{aligned}$$

256 where  $\mathcal{I}_{t,b}$  denotes the sample index set of the  $b$ -th batch in the  $t$ -th epoch.

257 The primary distinction between SGD and SAM lies in how neuron activation is determined. In SAM,  
 258 the activation is based on the perturbed weight  $\mathbf{w}_{j,r}^{(t,b)} + \hat{\epsilon}_{j,r}^{(t,b)}$ , whereas in SGD, it is determined by  
 259 the unperturbed weight  $\mathbf{w}_{j,r}^{(t,b)}$ . This perturbation to the weight update process at each iteration gives  
 260 SAM an intriguing denoising property. Specifically, if a neuron is activated by the SGD update, it  
 261 will subsequently become deactivated after the perturbation, as stated in the following lemma.

262 **Lemma 4.3 (Informal).** *If  $\langle \mathbf{w}_{j,r}^{(t,b)}, \boldsymbol{\xi}_k \rangle \geq 0$ ,  $k \in \mathcal{I}_{t,b}$  and  $j = y_k$ , then  $\langle \mathbf{w}_{j,r}^{(t,b)} + \hat{\epsilon}_{j,r}^{(t,b)}, \boldsymbol{\xi}_k \rangle < 0$ .*

263 By leveraging this intriguing property, we can derive a constant upper bound for the noise coefficients  
 264  $\bar{\rho}_{j,r,i}^{(t,b)}$  by considering the following cases:

- 265 1. If  $\boldsymbol{\xi}_i$  is not in the current batch, then  $\bar{\rho}_{j,r,i}^{(t,b)}$  will not be updated in the current iteration.
- 266 2. If  $\boldsymbol{\xi}_i$  is in the current batch, we discuss two cases:
  - 267 (a) If  $\langle \mathbf{w}_{j,r}^{(t,b)}, \boldsymbol{\xi}_i \rangle \geq 0$ , then by Lemma 4.3, one can know that  $\sigma'(\langle \mathbf{w}_{j,r}^{(t,b)} + \hat{\epsilon}_{j,r}^{(t,b)}, \boldsymbol{\xi}_i \rangle) = 0$  and  
 268 thus  $\bar{\rho}_{j,r,i}^{(t,b)}$  will not be updated in the current iteration.
  - 269 (b) If  $\langle \mathbf{w}_{j,r}^{(t,b)}, \boldsymbol{\xi}_i \rangle \leq 0$ , then given that  $\langle \mathbf{w}_{j,r}^{(t,b)}, \boldsymbol{\xi}_i \rangle \approx \bar{\rho}_{j,r,i}^{(t,b)}$  and  $\bar{\rho}_{j,r,i}^{(t,b+1)} \leq \bar{\rho}_{j,r,i}^{(t,b)} + \frac{\eta(P-1)^2 \|\boldsymbol{\xi}_i\|_2^2}{Bm}$ ,  
 270 we can assert that, provided  $\eta$  is sufficiently small, the term  $\bar{\rho}_{j,r,i}^{(t,b)}$  can be upper bounded by a  
 271 small constant.

272 In contrast to the analysis of SGD, which provides an upper bound for  $\bar{\rho}_{j,r,i}^{(t,b)}$  of order  $O(\log d)$ ,  
 273 the noise memorization prevention property described in Lemma 4.3 allows us to obtain an upper  
 274 bound for  $\bar{\rho}_{j,r,i}^{(t,b)}$  of order  $O(1)$  throughout  $[0, T_1]$ . This indicates that SAM memorizes less noise  
 275 compared to SGD. On the other hand, the signal coefficient  $\gamma_{j,r,i}^{(t)}$  also increases to  $\Omega(1)$  for SAM,  
 276 following the same argument as in SGD. This property ensures that training with SAM does not  
 277 exhibit harmful overfitting for the same signal-to-noise ratio at which training with SGD suffers from  
 278 harmful overfitting.

## 279 5 Experiments

280 In this section, we conduct synthetic experiments to validate our theory. Additional experiments on  
 281 real data set can be found in Appendix D.

282 We set training data size  $n = 20$  without label-flipping noise. Since the learning problem is rotation-  
 283 invariant, without loss of generality, we set  $\boldsymbol{\mu} = \|\boldsymbol{\mu}\|_2 \cdot [1, 0, \dots, 0]^\top$ . We then generate the noise  
 284 vector  $\boldsymbol{\xi}$  from the Gaussian distribution  $\mathcal{N}(\mathbf{0}, \sigma_p^2 \mathbf{I})$  with fixed standard deviation  $\sigma_p = 1$ . We train a  
 285 two-layer CNN model defined in Section 2 with ReLU activation function. The number of filters is  
 286 set as  $m = 10$ . We use the default initialization method in PyTorch to initialize the CNN parameters  
 287 and train the CNN with full-batch gradient descent with a learning rate of 0.1 for 100 iterations. We  
 288 consider different dimensions  $d$  ranging from 1000 to 20000, and different signal strengths  $\|\boldsymbol{\mu}\|_2$



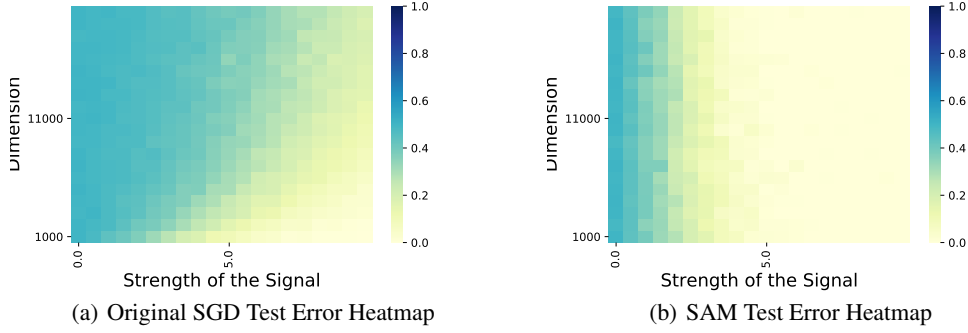

Figure 2: (a) is a heatmap illustrating test error on synthetic data for various dimensions  $d$  and signal strengths  $\mu$  when trained using Vanilla Gradient Descent. High test errors are represented in blue, while low test errors are shown in yellow. (b) displays a heatmap of test errors on the synthetic data under the same conditions as in (a), but trained using SAM instead with  $\tau = 0.03$ .

289 ranging from 0 to 10. Based on our results, for any dimension  $d$  and signal strength  $\mu$  setting we  
 290 consider, our training setup can guarantee a training loss smaller than 0.05. After training, we estimate  
 291 the test error for each case using 1000 test data points. We report the test error heat map with average  
 292 results over 10 runs in Figure 2.

## 293 6 Related Work

294 **Sharpness Aware Minimization.** Foret et al. (2020), and Zheng et al. (2021) concurrently introduced  
 295 methods to enhance generalization by minimizing the loss in the worst direction, perturbed from the  
 296 current parameter. Kwon et al. (2021) introduced ASAM, a variant of SAM, designed to address  
 297 parameter re-scaling. Subsequently, Liu et al. (2022b) presented LookSAM, a more computationally  
 298 efficient alternative. Zhuang et al. (2022) highlighted that SAM does not consistently favor the flat  
 299 minima and proposed GSAM to improve generalization by minimizing the surrogate. Recently, Zhao  
 300 et al. (2022) showed that SAM algorithm is related to gradient regularization (GR) method when loss  
 301 is smooth, and proposed an algorithm which can be viewed as an generalization of SAM algorithm.  
 302 Meng et al. (2023) further studied the mechanism of Per-Example Gradient Regularization (PEGR)  
 303 on the CNN training and reveals that PEGR penalizes the variance of pattern learning.

304 **Benign Overfitting in Neural Networks.** Since the pioneering work by Bartlett et al. (2020) on  
 305 benign overfitting in linear regression, there is a surge of research studying benign overfitting in linear  
 306 models, kernel methods and neural networks. Li et al. (2021); Montanari and Zhong (2022) examined  
 307 benign overfitting in random feature or neural tangent kernel models defined in two-layer neural  
 308 networks. Chatterji and Long (2022) studied the excess risk of interpolating deep linear networks  
 309 trained by gradient flow. Understanding benign overfitting in neural networks beyond the linear/kernel  
 310 regime is much more challenging because of the non-convexity of the problem. Recently, Frei et al.  
 311 (2022) studied benign overfitting in fully-connected two-layer neural networks with smoothed leaky  
 312 ReLU activation. Cao et al. (2022) provided an analysis for learning two-layer convolutional neural  
 313 networks (CNNs) with polynomial ReLU activation function ( $\text{ReLU}^q$ ,  $q > 2$ ). Kou et al. (2023)  
 314 further investigates the phenomenon of benign overfitting in learning two-layer ReLU CNNs.

## 315 7 Conclusion

316 In this work, we rigorously analyze the training behavior of two-layer convolutional ReLU networks  
 317 for both SGD and SAM. In particular, we precisely outlined the conditions under which benign  
 318 overfitting can occur during SGD training, marking the first such finding for neural networks trained  
 319 with mini-batch SGD. We also proved that SAM could lead to benign overfitting under circumstances  
 320 that prompt harmful overfitting via SGD, which demonstrates the clear theoretical superiority of  
 321 SAM over SGD. Our results provide a deeper comprehension of SAM, particularly when it comes  
 322 to its utilization with non-smooth neural networks. An interesting future work is to consider other  
 323 modern deep learning techniques, such as weight normalization, momentum, and weight decay, in  
 324 our analysis.

## References

- ALLEN-ZHU, Z. and LI, Y. (2020). Towards understanding ensemble, knowledge distillation and self-distillation in deep learning. *arXiv preprint arXiv:2012.09816* .
- ANDRIUSHCHENKO, M. and FLAMMARION, N. (2022). Towards understanding sharpness-aware minimization. In *International Conference on Machine Learning*. PMLR.
- BAHRI, D., MOBAHI, H. and TAY, Y. (2021). Sharpness-aware minimization improves language model generalization. *arXiv preprint arXiv:2110.08529* .
- BARTLETT, P. L., LONG, P. M. and BOUSQUET, O. (2022). The dynamics of sharpness-aware minimization: Bouncing across ravines and drifting towards wide minima. *arXiv preprint arXiv:2210.01513* .
- BARTLETT, P. L., LONG, P. M., LUGOSI, G. and TSIGLER, A. (2020). Benign overfitting in linear regression. *Proceedings of the National Academy of Sciences* .
- BEHDIN, K. and MAZUMDER, R. (2023). Sharpness-aware minimization: An implicit regularization perspective. *arXiv preprint arXiv:2302.11836* .
- BEHDIN, K., SONG, Q., GUPTA, A., DURFEE, D., ACHARYA, A., KEERTHI, S. and MAZUMDER, R. (2022). Improved deep neural network generalization using m-sharpness-aware minimization. *arXiv preprint arXiv:2212.04343* .
- CAO, Y., CHEN, Z., BELKIN, M. and GU, Q. (2022). Benign overfitting in two-layer convolutional neural networks. *Advances in neural information processing systems* **35** 25237–25250.
- CHATTERJI, N. S. and LONG, P. M. (2021). Finite-sample analysis of interpolating linear classifiers in the overparameterized regime. *Journal of Machine Learning Research* **22** 129–1.
- CHATTERJI, N. S. and LONG, P. M. (2022). Deep linear networks can benignly overfit when shallow ones do. *arXiv preprint arXiv:2209.09315* .
- CHEN, X., HSIEH, C.-J. and GONG, B. (2021). When vision transformers outperform resnets without pre-training or strong data augmentations. *arXiv preprint arXiv:2106.01548* .
- DEVROYE, L., MEHRABIAN, A. and REDDAD, T. (2018). The total variation distance between high-dimensional gaussians. *arXiv preprint arXiv:1810.08693* .
- FORET, P., KLEINER, A., MOBAHI, H. and NEYSHABUR, B. (2020). Sharpness-aware minimization for efficiently improving generalization. *arXiv preprint arXiv:2010.01412* .
- FREI, S., CHATTERJI, N. S. and BARTLETT, P. (2022). Benign overfitting without linearity: Neural network classifiers trained by gradient descent for noisy linear data. In *Conference on Learning Theory*. PMLR.
- JELASSI, S. and LI, Y. (2022). Towards understanding how momentum improves generalization in deep learning. In *International Conference on Machine Learning*. PMLR.
- KOU, Y., CHEN, Z., CHEN, Y. and GU, Q. (2023). Benign overfitting for two-layer relu networks. *arXiv preprint arXiv:2303.04145* .
- KWON, J., KIM, J., PARK, H. and CHOI, I. K. (2021). Asam: Adaptive sharpness-aware minimization for scale-invariant learning of deep neural networks. In *International Conference on Machine Learning*. PMLR.
- LI, Z., ZHOU, Z.-H. and GRETTON, A. (2021). Towards an understanding of benign overfitting in neural networks. *arXiv preprint arXiv:2106.03212* .
- LIU, Y., MAI, S., CHEN, X., HSIEH, C.-J. and YOU, Y. (2022a). Towards efficient and scalable sharpness-aware minimization. In *Proceedings of the IEEE/CVF Conference on Computer Vision and Pattern Recognition (CVPR)*.

369 LIU, Y., MAI, S., CHEN, X., HSIEH, C.-J. and YOU, Y. (2022b). Towards efficient and scalable  
370 sharpness-aware minimization. In *Proceedings of the IEEE/CVF Conference on Computer Vision*  
371 *and Pattern Recognition*.

372 MENG, X., CAO, Y. and ZOU, D. (2023). Per-example gradient regularization improves learning  
373 signals from noisy data. *arXiv preprint arXiv:2303.17940* .

374 MONTANARI, A. and ZHONG, Y. (2022). The interpolation phase transition in neural networks:  
375 Memorization and generalization under lazy training. *The Annals of Statistics* **50** 2816–2847.

376 SHEN, R., BUBECK, S. and GUNASEKAR, S. (2022). Data augmentation as feature manipulation: a  
377 story of desert cows and grass cows. *arXiv preprint arXiv:2203.01572* .

378 VERSHYNIN, R. (2018). *High-Dimensional Probability: An Introduction with Applications in Data*  
379 *Science*. Cambridge Series in Statistical and Probabilistic Mathematics, Cambridge University  
380 Press.

381 WEN, K., MA, T. and LI, Z. (2022). How does sharpness-aware minimization minimize sharpness?  
382 *arXiv preprint arXiv:2211.05729* .

383 ZHANG, C., BENGIO, S., HARDT, M., RECHT, B. and VINYALS, O. (2021). Understanding deep  
384 learning (still) requires rethinking generalization. *Communications of the ACM* **64** 107–115.

385 ZHAO, Y., ZHANG, H. and HU, X. (2022). Penalizing gradient norm for efficiently improving  
386 generalization in deep learning. In *International Conference on Machine Learning*. PMLR.

387 ZHENG, Y., ZHANG, R. and MAO, Y. (2021). Regularizing neural networks via adversarial model  
388 perturbation. In *Proceedings of the IEEE/CVF Conference on Computer Vision and Pattern*  
389 *Recognition*.

390 ZHUANG, J., GONG, B., YUAN, L., CUI, Y., ADAM, H., DVORNEK, N., TATIKONDA, S., DUNCAN,  
391 J. and LIU, T. (2022). Surrogate gap minimization improves sharpness-aware training. *arXiv*  
392 *preprint arXiv:2203.08065* .

## A Preliminary Lemmas

**Lemma A.1** (Lemma B.4 in Kou et al. (2023)). *Suppose that  $\delta > 0$  and  $d = \Omega(\log(6n/\delta))$ . Then with probability at least  $1 - \delta$ ,*

$$\begin{aligned}\sigma_p^2 d/2 &\leq \|\xi_i\|_2^2 \leq 3\sigma_p^2 d/2, \\ |\langle \xi_i, \xi_{i'} \rangle| &\leq 2\sigma_p^2 \cdot \sqrt{d \log(6n^2/\delta)}, \\ |\langle \xi_i, \mu \rangle| &\leq \|\mu\|_2 \sigma_p \cdot \sqrt{2 \log(6n/\delta)}\end{aligned}$$

for all  $i, i' \in [n]$ .

**Lemma A.2** (Lemma B.5 in Kou et al. (2023)). *Suppose that  $d = \Omega(\log(mn/\delta))$ ,  $m = \Omega(\log(1/\delta))$ . Then with probability at least  $1 - \delta$ ,*

$$\begin{aligned}\sigma_0^2 d/2 &\leq \|\mathbf{w}_{j,r}^{(0,0)}\|_2^2 \leq 3\sigma_0^2 d/2, \\ |\langle \mathbf{w}_{j,r}^{(0,0)}, \mu \rangle| &\leq \sqrt{2 \log(12m/\delta)} \cdot \sigma_0 \|\mu\|_2, \\ |\langle \mathbf{w}_{j,r}^{(0,0)}, \xi_i \rangle| &\leq 2\sqrt{\log(12mn/\delta)} \cdot \sigma_0 \sigma_p \sqrt{d}\end{aligned}$$

for all  $r \in [m]$ ,  $j \in \{\pm 1\}$  and  $i \in [n]$ . Moreover,

$$\begin{aligned}\sigma_0 \|\mu\|_2/2 &\leq \max_{r \in [m]} j \cdot \langle \mathbf{w}_{j,r}^{(0,0)}, \mu \rangle \leq \sqrt{2 \log(12m/\delta)} \cdot \sigma_0 \|\mu\|_2, \\ \sigma_0 \sigma_p \sqrt{d}/4 &\leq \max_{r \in [m]} j \cdot \langle \mathbf{w}_{j,r}^{(0,0)}, \xi_i \rangle \leq 2\sqrt{\log(12mn/\delta)} \cdot \sigma_0 \sigma_p \sqrt{d}\end{aligned}$$

for all  $j \in \{\pm 1\}$  and  $i \in [n]$ .

**Lemma A.3.** *Let  $S_i^{(t,b)}$  denote  $\{r : \langle \mathbf{w}_{y_i,r}^{(t,b)}, \xi_i \rangle > \sigma_0 \sigma_p \sqrt{d}/\sqrt{2}\}$ . Suppose that  $\delta > 0$  and  $m \geq 50 \log(2n/\delta)$ . Then with probability at least  $1 - \delta$ ,*

$$|S_i^{(0,0)}| \geq 0.8\Phi(-1)m, \forall i \in [n].$$

*Proof of Lemma A.3.* Since  $\langle \mathbf{w}_{y_i,r}^{(0,0)}, \xi_i \rangle \sim \mathcal{N}(0, \sigma_0^2 \|\xi_i\|_2^2)$ , we have

$$P(\langle \mathbf{w}_{y_i,r}^{(0,0)}, \xi_i \rangle > \sigma_0 \sigma_p \sqrt{d}/\sqrt{2}) \geq P(\langle \mathbf{w}_{y_i,r}^{(0,0)}, \xi_i \rangle > \sigma_0 \|\xi_i\|_2) = \Phi(-1),$$

where  $\Phi(\cdot)$  is CDF of the standard normal distribution. Note that  $|S_i^{(0,0)}| = \sum_{r=1}^m \mathbb{1}[\langle \mathbf{w}_{y_i,r}^{(0,0)}, \xi_i \rangle > \sigma_0 \sigma_p \sqrt{d}/\sqrt{2}]$  and  $P(\langle \mathbf{w}_{y_i,r}^{(0,0)}, \xi_i \rangle > \sigma_0 \sigma_p \sqrt{d}/\sqrt{2}) \geq \Phi(-1)$ , then by Hoeffding's inequality, with probability at least  $1 - \delta/n$ , we have

$$\frac{|S_i^{(0,0)}|}{m} \geq \Phi(-1) - \sqrt{\frac{\log(2n/\delta)}{2m}}.$$

Therefore, as long as  $0.2\sqrt{m}\Phi(-1) \geq \sqrt{\frac{\log(2n/\delta)}{2}}$ , by applying union bound, with probability at least  $1 - \delta$ , we have

$$|S_i^{(0)}| \geq 0.8\Phi(-1)m, \forall i \in [n].$$

□

**Lemma A.4.** *Let  $S_{j,r}^{(t,b)}$  denote  $\{i \in [n] : y_i = j, \langle \mathbf{w}_{y_i,r}^{(t,b)}, \xi_i \rangle > \sigma_0 \sigma_p \sqrt{d}/\sqrt{2}\}$ . Suppose that  $\delta > 0$  and  $n \geq 32 \log(4m/\delta)$ . Then with probability at least  $1 - \delta$ ,*

$$|S_{j,r}^{(0)}| \geq n\Phi(-1)/4, \forall j \in \{\pm 1\}, r \in [m].$$

*Proof of Lemma A.4.* Since  $\langle \mathbf{w}_{j,r}^{(0,0)}, \xi_i \rangle \sim \mathcal{N}(0, \sigma_0^2 \|\xi_i\|_2^2)$ , we have

$$P(\langle \mathbf{w}_{j,r}^{(0,0)}, \xi_i \rangle > \sigma_0 \sigma_p \sqrt{d}/\sqrt{2}) \geq P(\langle \mathbf{w}_{j,r}^{(0,0)}, \xi_i \rangle > \sigma_0 \|\xi_i\|_2) = \Phi(-1),$$

where  $\Phi(\cdot)$  is CDF of the standard normal distribution.

414 Note that  $|S_{j,r}^{(0,0)}| = \sum_{i=1}^n \mathbb{1}[y_i = j] \mathbb{1}[\langle \mathbf{w}_{j,r}^{(0)}, \boldsymbol{\xi}_i \rangle > \sigma_0 \sigma_p \sqrt{d}/\sqrt{2}]$  and  $\mathbb{P}(y_i = j, \langle \mathbf{w}_{j,r}^{(0)}, \boldsymbol{\xi}_i \rangle >$   
 415  $\sigma_0 \sigma_p \sqrt{d}/\sqrt{2}) \geq \Phi(-1)/2$ , then by Hoeffding's inequality, with probability at least  $1 - \delta/2m$ , we  
 416 have

$$\frac{|S_{j,r}^{(0)}|}{n} \geq \Phi(-1)/2 + \sqrt{\frac{\log(4m/\delta)}{2n}}.$$

417 Therefore, as long as  $\Phi(-1)/4 \geq \sqrt{\frac{\log(4m/\delta)}{2n}}$ , by applying union bound, we have with probability  
 418 at least  $1 - \delta$ ,

$$|S_{j,r}^{(0)}| \geq n\Phi(-1)/4, \forall j \in \{\pm 1\}, r \in [m].$$

419

□

420 **Lemma A.5** (Lemma B.3 in Kou et al. (2023)). *For  $|S_+ \cap S_y|$  and  $|S_- \cap S_y|$  where  $y \in \{\pm 1\}$ , it*  
 421 *holds with probability at least  $1 - \delta$  ( $\delta > 0$ ) that*

$$\left| |S_+ \cap S_y| - \frac{(1-p)n}{2} \right| \leq \sqrt{\frac{n}{2} \log\left(\frac{8}{\delta}\right)}, \left| |S_- \cap S_y| - \frac{pn}{2} \right| \leq \sqrt{\frac{n}{2} \log\left(\frac{8}{\delta}\right)}, \forall y \in \{\pm 1\}.$$

422 **Lemma A.6.** *It holds with probability at least  $1 - \delta$ , for all  $T \in [\frac{\log(2T^*/\delta)}{c_3^2}, T^*]$  and  $y \in \{\pm 1\}$ ,*  
 423 *there exist at least  $c_3 \cdot T$  epochs among  $[0, T]$ , such that at least  $c_4 \cdot H$  batches in these epochs, satisfy*

$$|S_+ \cap S_y \cap \mathcal{I}_{t,b}| \in \left[ \frac{B}{4}, \frac{3B}{4} \right]. \quad (14)$$

424 *Proof.* Let

$$\mathcal{E}_{1,t} := \{\text{In epoch } t, \text{ there are at least } c_2 \cdot \frac{n}{B} \text{ batches such that 14 holds for } y = 1\},$$

$$\mathcal{E}_{1,t,b} := \{\text{In epoch } t \text{ batch } b, \text{ 14 holds for } y = 1\}.$$

425 First let  $n$  big enough, then we have  $S_+ \cap S_y \in [\frac{3(1-p)n}{8}, \frac{5(1-p)n}{8}]$ . We consider the first  $c_1 H$   
 426 batches. At the time we are starting to sample  $h$ -th batch in the first  $c_1 H$  batches, suppose there are  
 427  $n_1$  samples that belong to  $S_+ \cap S_y$  and there are  $n_2$  samples that don't belong to  $S_+ \cap S_y$ . Then  
 428  $n_1 \geq \frac{3(1-p)n}{8} - c_1 n \geq \frac{5(1-p)n}{16}$  and  $n_2 \geq \frac{3(1-p)n}{8} - c_1 n \geq \frac{5(1-p)n}{16}$ .

$$\begin{aligned} \mathbb{P}(\mathcal{E}_{1,t,h}) &= \frac{\sum_{l=B/4}^{3B/4} C_B^l C_{n_1}^l C_{n_2}^{B-l}}{C_n^B} \\ &\geq \frac{\sum_{l=1B/4}^{3B/4} C_B^l C_{\frac{5(1-p)n}{16}}^l C_{\frac{5(1-p)n}{16}}^{B-l}}{C_n^B} \\ &\geq \frac{\frac{B}{2} C_B^{B/4} \left(\frac{9(1-p)n}{32}\right)^{B/B!}}{n^B/B!} \\ &= \frac{B}{2} C_B^{B/4} \left(\frac{9(1-p)}{32}\right)^B := 2c_2. \end{aligned}$$

429 Then, the probability that there are less than  $c_1 c_2 H$  batches in first  $c_1 H$  batches such that 14 holds is:

$$\begin{aligned} &\sum_{i=0}^{c_1 c_2 H-1} \sum_{\sum l_h=i} \mathbb{P}[\mathbb{1}(\mathcal{E}_{1,t,0}) = l_0] \mathbb{P}[\mathbb{1}(\mathcal{E}_{1,t,1}) = l_1 | \mathbb{1}(\mathcal{E}_{1,t,0}) = l_0] \cdots \\ &\quad \mathbb{P}[\mathbb{1}(\mathcal{E}_{1,t,c_1 H-1}) = l_{c_1 H-1} | \mathbb{1}(\mathcal{E}_{1,t,0}) = l_0, \dots, \mathbb{1}(\mathcal{E}_{1,t,c_1 H-2}) = l_{c_1 H-2}] \\ &\leq \sum_{i=0}^{c_1 c_2 H} C_{c_1 H}^i (1 - 2c_2)^{c_1 H-i} \\ &\leq c_1 c_2 H \cdot (2c_2)^{c_1 c_2 H} (1 - 2c_2)^{c_1 H - c_1 c_2 H} \end{aligned}$$

430 Choose  $H_0$  such that  $c_1 c_2 H_0 \cdot (2c_2)^{c_1 c_2 H_0} (1 - 2c_2)^{c_1 H_0 - c_1 c_2 H_0} = 1 - 2c_3$ , then as long as  $H \geq H_0$ ,  
 431 with probability  $c_3$ , there are at least  $c_1 c_2 H$  batches in first  $c_1 H$  batches such that 14 holds. Then  
 432  $\mathbb{P}[\mathcal{E}_{1,t}] \geq 2c_3$ .

433 Therefore,

$$\mathbb{P}\left(\sum_t \mathbf{1}(\mathcal{E}_t) - 2Tc_3 \leq -t\right) \leq \exp\left(-\frac{2t^2}{T}\right)$$

434 Let  $T \geq \frac{\log(2T^*/\delta)}{2c_3^2}$ . Then, with probability at least  $1 - \delta/(2T^*)$ ,

$$\sum_t \mathbf{1}(\mathcal{E}_{1,t}) \geq c_3 T.$$

435 Let  $c_4 = c_1 c_2$ . Thus there are at least  $c_3 T^*$  epochs, such that they have at least  $c_4 H$  batches satisfying  
 436 EquationA.6. This also holds for  $y = -1$ . Taking a union bound to get the result.  $\square$

## 437 B Result of SGD

438 In this section, we build the result for SGD. We first define some notations. Define  $H = n/B$  as  
 439 the number of batches within an epoch. For any  $t_1, t_2$  and  $b_1, b_2 \in [H]$ , we write  $(t_1, b_1) \leq (t, b) \leq$   
 440  $(t_2, b_2)$  to denote all iterations from  $t_1$ -th epoch's  $b_1$ -th batch (included) to  $t_2$ -th epoch's  $b_2$ -th batch  
 441 (included). And the meanings change accordingly if we replace  $\leq$  with  $<$ .

### 442 B.1 Signal-noise Decomposition Coefficient Analysis

443 This part is dedicated to analyzing the update rule of Signal-noise Decomposition Coefficients. It is  
 444 worth noting that

$$F_j(\mathbf{W}, \mathbf{X}) = \frac{1}{m} \sum_{r=1}^m \sum_{p=1}^P \sigma(\langle \mathbf{w}_{j,r}, \mathbf{x}_p \rangle) = \frac{1}{m} \sum_{r=1}^m \sigma(\langle \mathbf{w}_{j,r}, \hat{\mathbf{y}} \boldsymbol{\mu} \rangle) + (P-1) \sigma(\langle \mathbf{w}_{j,r}, \boldsymbol{\xi} \rangle).$$

445 Let  $\mathcal{I}_{t,b}$  denote the set of indices of randomly chosen samples at epoch  $t$  batch  $b$ , and  $|\mathcal{I}_{t,b}| = B$ , then  
 446 the update rule is:

$$\begin{aligned} \text{for } b \in [H] \quad \mathbf{w}_{j,r}^{(t,b+1)} &= \mathbf{w}_{j,r}^{(t,b)} - \eta \cdot \nabla_{\mathbf{w}_{j,r}} L_{\mathcal{I}_{t,b}}(\mathbf{W}^{(t,b)}) \\ &= \mathbf{w}_{j,r}^{(t,b)} - \frac{\eta(P-1)}{Bm} \sum_{i \in \mathcal{I}_{t,b}} \ell'_i{}^{(t,b)} \cdot \sigma'(\langle \mathbf{w}_{j,r}^{(t,b)}, \boldsymbol{\xi}_i \rangle) \cdot jy_i \boldsymbol{\xi}_i \\ &\quad - \frac{\eta}{Bm} \sum_{i \in \mathcal{I}_{t,b}} \ell'_i{}^{(t,b)} \cdot \sigma'(\langle \mathbf{w}_{j,r}^{(t,b)}, \hat{\mathbf{y}}_i \boldsymbol{\mu} \rangle) \cdot jy_i \hat{\mathbf{y}}_i \boldsymbol{\mu} \\ \text{and} \quad \mathbf{w}_{j,r}^{(t+1,0)} &= \mathbf{w}_{j,r}^{(t,H)} \end{aligned} \tag{15}$$

#### 447 B.1.1 Iterative Expression for Decomposition Coefficient Analysis

448 **Lemma B.1.** The coefficients  $\gamma_{j,r}^{(t,b)}, \bar{\rho}_{j,r,i}^{(t,b)}, \underline{\rho}_{j,r,i}^{(t,b)}$  defined in Definition 3.3 satisfy the following itera-  
 449 tive equations:

$$\gamma_{j,r}^{(0,0)}, \bar{\rho}_{j,r,i}^{(0,0)}, \underline{\rho}_{j,r,i}^{(0,0)} = 0, \tag{16}$$

$$\begin{aligned} \gamma_{j,r}^{(t,b+1)} &= \gamma_{j,r}^{(t,b)} - \frac{\eta}{Bm} \cdot \left[ \sum_{i \in \mathcal{I}_{t,b} \cap S_+} \ell'_i{}^{(t,b)} \sigma'(\langle \mathbf{w}_{j,r}^{(t,b)}, \hat{\mathbf{y}}_i \cdot \boldsymbol{\mu} \rangle) \right. \\ &\quad \left. - \sum_{i \in \mathcal{I}_{t,b} \cap S_-} \ell'_i{}^{(t,b)} \sigma'(\langle \mathbf{w}_{j,r}^{(t,b)}, \hat{\mathbf{y}}_i \cdot \boldsymbol{\mu} \rangle) \right] \cdot \|\boldsymbol{\mu}\|_2^2, \end{aligned} \tag{17}$$

$$\bar{\rho}_{j,r,i}^{(t,b+1)} = \bar{\rho}_{j,r,i}^{(t,b)} - \frac{\eta(P-1)^2}{Bm} \cdot \ell'_i{}^{(t,b)} \cdot \sigma'(\langle \mathbf{w}_{j,r}^{(t,b)}, \boldsymbol{\xi}_i \rangle) \cdot \|\boldsymbol{\xi}_i\|_2^2 \cdot \mathbf{1}(y_i = j) \mathbf{1}(i \in \mathcal{I}_{t,b}), \tag{18}$$

$$\underline{\rho}_{j,r,i}^{(t,b+1)} = \underline{\rho}_{j,r,i}^{(t,b)} + \frac{\eta(P-1)^2}{Bm} \cdot \ell_i'(t,b) \cdot \sigma'(\langle \mathbf{w}_{j,r}^{(t,b)}, \boldsymbol{\xi}_i \rangle) \cdot \|\boldsymbol{\xi}_i\|_2^2 \cdot \mathbb{1}(y_i = -j) \mathbb{1}(i \in \mathcal{I}_{t,b}), \quad (19)$$

450 for all  $r \in [m]$ ,  $j \in \{\pm 1\}$  and  $i \in [n]$ .

451 *Proof.* First, we iterate the gradient descent update rule  $t$  epochs plus  $b$  batches and get

$$\begin{aligned} \mathbf{w}_{j,r}^{(t,b)} &= \mathbf{w}_{j,r}^{(0,0)} - \frac{\eta(P-1)}{Bm} \sum_{(t',b') < (t,b)} \sum_{i \in \mathcal{I}_{t',b'}} \ell_i'(t',b') \cdot \sigma'(\langle \mathbf{w}_{j,r}^{(t',b')}, \boldsymbol{\xi}_i \rangle) \cdot j y_i (P-1) \boldsymbol{\xi}_i \\ &\quad - \frac{\eta}{Bm} \sum_{(t',b') < (t,b)} \sum_{i \in \mathcal{I}_{s,k}} \ell_i'(t',b') \cdot \sigma'(\langle \mathbf{w}_{j,r}^{(t',b')}, \hat{y}_i \boldsymbol{\mu} \rangle) \cdot y_i \hat{y}_i j \boldsymbol{\mu} \end{aligned}$$

452 According to the definition of  $\gamma_{j,r}^{(t)}$  and  $\rho_{j,r,i}^{(t)}$ ,

$$\mathbf{w}_{j,r}^{(t,b)} = \mathbf{w}_{j,r}^{(0,0)} + j \cdot \gamma_{j,r}^{(t,b)} \cdot \|\boldsymbol{\mu}\|_2^{-2} \cdot \boldsymbol{\mu} + \frac{1}{P-1} \sum_{i=1}^n \rho_{j,r,i}^{(t,b)} \cdot \|\boldsymbol{\xi}_i\|_2^{-2} \cdot \boldsymbol{\xi}_i.$$

453 Since  $\boldsymbol{\xi}_i$  and  $\boldsymbol{\mu}$  are linearly independent with probability 1, we have the unique representation as  
454 follows:

$$\begin{aligned} \rho_{j,r,i}^{(t,b)} &= -\frac{\eta(P-1)^2}{Bm} \sum_{(t',b') < (t,b)} \ell_i'(t',b') \cdot \sigma'(\langle \mathbf{w}_{j,r}^{(t',b')}, \boldsymbol{\xi}_i \rangle) \cdot \|\boldsymbol{\xi}_i\|_2^2 \mathbb{1}(i \in \mathcal{I}_{s,k}) y_i j \\ \gamma_{j,r}^{(t,b)} &= -\frac{\eta}{Bm} \sum_{(t',b') < (t,b)} \left[ \sum_{i \in \mathcal{I}_{t',b'} \cap S_+} \ell_i'(t',b') \sigma'(\langle \mathbf{w}_{j,r}^{(t',b')}, y_i \cdot \boldsymbol{\mu} \rangle) \right. \\ &\quad \left. - \sum_{i \in \mathcal{I}_{t',b'} \cap S_-} \ell_i'(t',b') \sigma'(\langle \mathbf{w}_{j,r}^{(t',b')}, y_i \cdot \boldsymbol{\mu} \rangle) \right] \|\boldsymbol{\mu}\|_2^2 \end{aligned}$$

455 Since we define  $\bar{\rho}_{j,r,i}^{(t,b)} := \rho_{j,r,i}^{(t,b)} \mathbb{1}(\rho_{j,r,i}^{(t,b)} \geq 0)$ ,  $\underline{\rho}_{j,r,i}^{(t,b)} := \rho_{j,r,i}^{(t,b)} \mathbb{1}(\rho_{j,r,i}^{(t,b)} \leq 0)$ , we obtain

$$\begin{aligned} \bar{\rho}_{j,r,i}^{(t,b)} &= -\frac{\eta(P-1)^2}{Bm} \sum_{(t',b') < (t,b)} \ell_i'(t',b') \cdot \sigma'(\langle \mathbf{w}_{j,r}^{(t',b')}, \boldsymbol{\xi}_i \rangle) \cdot \|\boldsymbol{\xi}_i\|_2^2 \mathbb{1}(i \in \mathcal{I}_{t',b'}) \mathbb{1}(y_i = j) \\ \underline{\rho}_{j,r,i}^{(t,b)} &= \frac{\eta(P-1)^2}{Bm} \sum_{(t',b') < (t,b)} \ell_i'(t',b') \cdot \sigma'(\langle \mathbf{w}_{j,r}^{(t',b')}, \boldsymbol{\xi}_i \rangle) \cdot \|\boldsymbol{\xi}_i\|_2^2 \mathbb{1}(i \in \mathcal{I}_{t',b'}) \mathbb{1}(y_i = -j) \end{aligned}$$

456 And the iterative update equations (17), (18), and (19) follow directly.  $\square$

### 457 B.1.2 Scale of Decomposition Coefficients

458 We first define  $T^* = \eta^{-1} \text{poly}(\epsilon^{-1}, d, n, m)$  and

$$\alpha := 4 \log(T^*), \quad (20)$$

$$\beta := 2 \max_{i,j,r} \{ |\langle \mathbf{w}_{j,r}^{(0,0)}, \boldsymbol{\mu} \rangle|, (P-1) |\langle \mathbf{w}_{j,r}^{(0,0)}, \boldsymbol{\xi}_i \rangle| \}, \quad (21)$$

$$\text{SNR} := \frac{\|\boldsymbol{\mu}\|_2}{(P-1) \sigma_p \sqrt{d}}. \quad (22)$$

459 By Lemma A.2 and Condition 3.1,  $\beta$  can be bounded as

$$\begin{aligned} \beta &= 2 \max_{i,j,r} \{ |\langle \mathbf{w}_{j,r}^{(0,0)}, \boldsymbol{\mu} \rangle|, (P-1) |\langle \mathbf{w}_{j,r}^{(0,0)}, \boldsymbol{\xi}_i \rangle| \} \\ &\leq 2 \max \{ \sqrt{2 \log(12m/\delta)} \cdot \sigma_0 \|\boldsymbol{\mu}\|_2, 2 \sqrt{\log(12mn/\delta)} \cdot \sigma_0 (P-1) \sigma_p \sqrt{d} \} \\ &= O(\sqrt{\log(mn/\delta)} \cdot \sigma_0 (P-1) \sigma_p \sqrt{d}) \end{aligned}$$

460 Then, by Condition 3.1, we have the following inequality:

$$\max \left\{ \beta, \text{SNR} \sqrt{\frac{32 \log(6n/\delta)}{d}} n \alpha, 5 \sqrt{\frac{\log(6n^2/\delta)}{d}} n \alpha \right\} \leq \frac{1}{12}. \quad (23)$$

461 We first prove the following bounds for signal-noise decomposition coefficients.

462 **Proposition B.2.** Under Assumption 3.1, for  $(0, 0) \leq (t, b) \leq (T^*, 0)$ , we have that

$$\gamma_{j,r}^{(0,0)}, \bar{\rho}_{j,r,i}^{(0,0)}, \underline{\rho}_{j,r,i}^{(0,0)} = 0 \quad (24)$$

$$0 \leq \bar{\rho}_{j,r,i}^{(t,b)} \leq \alpha, \quad (25)$$

$$0 \geq \underline{\rho}_{j,r,i}^{(t,b)} \geq -\beta - 10\sqrt{\frac{\log(6n^2/\delta)}{d}}n\alpha \geq -\alpha, \quad (26)$$

463 and there exists a positive constant  $C'$  such that

$$-\frac{1}{12} \leq \gamma_{j,r}^{(t,b)} \leq C'\hat{\gamma}\alpha, \quad (27)$$

464 for all  $r \in [m]$ ,  $j \in \{\pm 1\}$  and  $i \in [n]$ , where  $\hat{\gamma} := n \cdot \text{SNR}^2$ .

465 We will prove Proposition B.2 by induction. We first approximate the change of inner product by  
466 corresponding decomposition coefficients when Proposition B.2 holds.

467 **Lemma B.3.** Under Assumption 3.1, suppose (25), (26) and (27) hold after  $b$ -th batch of  $t$ -th epoch.  
468 Then, for all  $r \in [m]$ ,  $j \in \{\pm 1\}$  and  $i \in [n]$ ,

$$|\langle \mathbf{w}_{j,r}^{(t,b)} - \mathbf{w}_{j,r}^{(0,0)}, \boldsymbol{\mu} \rangle - j \cdot \gamma_{j,r}^{(t,b)}| \leq \text{SNR} \sqrt{\frac{32 \log(6n/\delta)}{d}} n\alpha, \quad (28)$$

$$|\langle \mathbf{w}_{j,r}^{(t,b)} - \mathbf{w}_{j,r}^{(0,0)}, \boldsymbol{\xi}_i \rangle - \frac{1}{P-1} \underline{\rho}_{j,r,i}^{(t,b)}| \leq \frac{5}{P-1} \sqrt{\frac{\log(6n^2/\delta)}{d}} n\alpha, \quad j \neq y_i, \quad (29)$$

$$|\langle \mathbf{w}_{j,r}^{(t,b)} - \mathbf{w}_{j,r}^{(0,0)}, \boldsymbol{\xi}_i \rangle - \frac{1}{P-1} \bar{\rho}_{j,r,i}^{(t,b)}| \leq \frac{5}{P-1} \sqrt{\frac{\log(6n^2/\delta)}{d}} n\alpha, \quad j = y_i. \quad (30)$$

469 *Proof of Lemma B.3.* First, for any time  $(t, b) \geq (0, 0)$ , we have from the following decomposition  
470 by dinitions,

$$\begin{aligned} \langle \mathbf{w}_{j,r}^{(t,b)} - \mathbf{w}_{j,r}^{(0,0)}, \boldsymbol{\mu} \rangle &= j \cdot \gamma_{j,r}^{(t,b)} + \frac{1}{P-1} \sum_{i'=1}^n \bar{\rho}_{j,r,i'}^{(t,b)} \|\boldsymbol{\xi}_{i'}\|_2^{-2} \cdot \langle \boldsymbol{\xi}_{i'}, \boldsymbol{\mu} \rangle \\ &\quad + \frac{1}{P-1} \sum_{i'=1}^n \underline{\rho}_{j,r,i'}^{(t,b)} \|\boldsymbol{\xi}_{i'}\|_2^{-2} \cdot \langle \boldsymbol{\xi}_{i'}, \boldsymbol{\mu} \rangle \end{aligned}$$

471 According to Lemma A.1, we have

$$\begin{aligned} &\left| \frac{1}{P-1} \sum_{i'=1}^n \bar{\rho}_{j,r,i'}^{(t,b)} \|\boldsymbol{\xi}_{i'}\|_2^{-2} \cdot \langle \boldsymbol{\xi}_{i'}, \boldsymbol{\mu} \rangle + \frac{1}{P-1} \sum_{i'=1}^n \underline{\rho}_{j,r,i'}^{(t,b)} \|\boldsymbol{\xi}_{i'}\|_2^{-2} \cdot \langle \boldsymbol{\xi}_{i'}, \boldsymbol{\mu} \rangle \right| \\ &\leq \frac{1}{P-1} \sum_{i'=1}^n |\bar{\rho}_{j,r,i'}^{(t,b)}| \|\boldsymbol{\xi}_{i'}\|_2^{-2} \cdot |\langle \boldsymbol{\xi}_{i'}, \boldsymbol{\mu} \rangle| + \frac{1}{P-1} \sum_{i'=1}^n |\underline{\rho}_{j,r,i'}^{(t,b)}| \|\boldsymbol{\xi}_{i'}\|_2^{-2} \cdot |\langle \boldsymbol{\xi}_{i'}, \boldsymbol{\mu} \rangle| \\ &\leq \frac{2\|\boldsymbol{\mu}\|_2 \sqrt{2 \log(6n/\delta)}}{(P-1)\sigma_p d} \left( \sum_{i'=1}^n |\bar{\rho}_{j,r,i'}^{(t,b)}| + \sum_{i'=1}^n |\underline{\rho}_{j,r,i'}^{(t,b)}| \right) \\ &= \text{SNR} \sqrt{\frac{8 \log(6n/\delta)}{d}} \left( \sum_{i'=1}^n |\bar{\rho}_{j,r,i'}^{(t,b)}| + \sum_{i'=1}^n |\underline{\rho}_{j,r,i'}^{(t,b)}| \right) \\ &\leq \text{SNR} \sqrt{\frac{32 \log(6n/\delta)}{d}} n\alpha, \end{aligned}$$

472 where the first inequality is by triangle inequality, the second inequality is by Lemma A.1, the equality  
473 is by  $\text{SNR} = \|\boldsymbol{\mu}\|_2 / ((P-1)\sigma_p \sqrt{d})$ , and the last inequality is by (25), (26). It follows that

$$|\langle \mathbf{w}_{j,r}^{(t,b)} - \mathbf{w}_{j,r}^{(0,0)}, \boldsymbol{\mu} \rangle - j \cdot \gamma_{j,r}^{(t,b)}| \leq \text{SNR} \sqrt{\frac{32 \log(6n/\delta)}{d}} n\alpha.$$



474 Then, for  $j \neq y_i$  and any  $t \geq 0$ , we have

$$\begin{aligned}
& \langle \mathbf{w}_{j,r}^{(t,b)} - \mathbf{w}_{j,r}^{(0,0)}, \boldsymbol{\xi}_i \rangle \\
&= j \cdot \gamma_{j,r}^{(t,b)} \|\boldsymbol{\mu}\|_2^{-2} \cdot \langle \boldsymbol{\mu}, \boldsymbol{\xi}_i \rangle + \frac{1}{P-1} \sum_{i'=1}^n \bar{\rho}_{j,r,i'}^{(t,b)} \|\boldsymbol{\xi}_{i'}\|_2^{-2} \cdot \langle \boldsymbol{\xi}_{i'}, \boldsymbol{\xi}_i \rangle \\
&\quad + \frac{1}{P-1} \sum_{i'=1}^n \underline{\rho}_{j,r,i'}^{(t,b)} \|\boldsymbol{\xi}_{i'}\|_2^{-2} \cdot \langle \boldsymbol{\xi}_{i'}, \boldsymbol{\xi}_i \rangle \\
&= j \cdot \gamma_{j,r}^{(t,b)} \|\boldsymbol{\mu}\|_2^{-2} \cdot \langle \boldsymbol{\mu}, \boldsymbol{\xi}_i \rangle + \frac{1}{P-1} \sum_{i'=1}^n \underline{\rho}_{j,r,i'}^{(t,b)} \|\boldsymbol{\xi}_{i'}\|_2^{-2} \cdot \langle \boldsymbol{\xi}_{i'}, \boldsymbol{\xi}_i \rangle \\
&= \frac{1}{P-1} \underline{\rho}_{j,r,i}^{(t,b)} + j \cdot \gamma_{j,r}^{(t,b)} \|\boldsymbol{\mu}\|_2^{-2} \cdot \langle \boldsymbol{\mu}, \boldsymbol{\xi}_i \rangle + \frac{1}{P-1} \sum_{i' \neq i} \underline{\rho}_{j,r,i'}^{(t,b)} \|\boldsymbol{\xi}_{i'}\|_2^{-2} \cdot \langle \boldsymbol{\xi}_{i'}, \boldsymbol{\xi}_i \rangle,
\end{aligned}$$

475 where the second equality is due to  $\underline{\rho}_{j,r,i}^{(t,b)} = 0$  for  $j \neq y_i$ . Next, we have

$$\begin{aligned}
& \left| j \cdot \gamma_{j,r}^{(t,b)} \|\boldsymbol{\mu}\|_2^{-2} \cdot \langle \boldsymbol{\mu}, \boldsymbol{\xi}_i \rangle + \frac{1}{P-1} \sum_{i' \neq i} \underline{\rho}_{j,r,i'}^{(t,b)} \|\boldsymbol{\xi}_{i'}\|_2^{-2} \cdot \langle \boldsymbol{\xi}_{i'}, \boldsymbol{\xi}_i \rangle \right| \\
&\leq |\gamma_{j,r}^{(t,b)}| \|\boldsymbol{\mu}\|_2^{-2} \cdot |\langle \boldsymbol{\mu}, \boldsymbol{\xi}_i \rangle| + \frac{1}{P-1} \sum_{i' \neq i} |\underline{\rho}_{j,r,i'}^{(t,b)}| \|\boldsymbol{\xi}_{i'}\|_2^{-2} \cdot |\langle \boldsymbol{\xi}_{i'}, \boldsymbol{\xi}_i \rangle| \\
&\leq |\gamma_{j,r}^{(t,b)}| \|\boldsymbol{\mu}\|_2^{-1} \sigma_p \sqrt{2 \log(6n/\delta)} + \frac{4}{P-1} \sqrt{\frac{\log(6n^2/\delta)}{d}} \sum_{i' \neq i} |\underline{\rho}_{j,r,i'}^{(t,b)}| \\
&= \frac{\text{SNR}^{-1}}{P-1} \sqrt{\frac{2 \log(6n/\delta)}{d}} |\gamma_{j,r}^{(t,b)}| + \frac{4}{P-1} \sqrt{\frac{\log(6n^2/\delta)}{d}} \sum_{i' \neq i} |\underline{\rho}_{j,r,i'}^{(t,b)}| \\
&\leq \frac{\text{SNR}}{P-1} \sqrt{\frac{8C^2 \log(6n/\delta)}{d}} n\alpha + \frac{4}{P-1} \sqrt{\frac{\log(6n^2/\delta)}{d}} n\alpha \\
&\leq \frac{5}{P-1} \sqrt{\frac{\log(6n^2/\delta)}{d}} n\alpha,
\end{aligned}$$

476 where the first inequality is by triangle inequality; the second inequality is by Lemma A.1; the  
477 equality is by  $\text{SNR} = \|\boldsymbol{\mu}\|_2 / \sigma_p \sqrt{d}$ ; the third inequality is by (26) and (27); the fourth inequality is by  
478  $\text{SNR} \leq 1/\sqrt{8C'^2}$ . Therefore, for  $j \neq y_i$ , we have

$$\left| \langle \mathbf{w}_{j,r}^{(t,b)} - \mathbf{w}_{j,r}^{(0,0)}, \boldsymbol{\xi}_i \rangle - \frac{1}{P-1} \underline{\rho}_{j,r,i}^{(t,b)} \right| \leq \frac{5}{P-1} \sqrt{\frac{\log(6n^2/\delta)}{d}} n\alpha.$$

479 Similarly, we have for  $y_i = j$  that

$$\begin{aligned}
& \langle \mathbf{w}_{j,r}^{(t,b)} - \mathbf{w}_{j,r}^{(0,0)}, \boldsymbol{\xi}_i \rangle \\
&= j \cdot \gamma_{j,r}^{(t,b)} \|\boldsymbol{\mu}\|_2^{-2} \cdot \langle \boldsymbol{\mu}, \boldsymbol{\xi}_i \rangle + \frac{1}{P-1} \sum_{i'=1}^n \bar{\rho}_{j,r,i'}^{(t,b)} \|\boldsymbol{\xi}_{i'}\|_2^{-2} \cdot \langle \boldsymbol{\xi}_{i'}, \boldsymbol{\xi}_i \rangle \\
&\quad + \frac{1}{P-1} \sum_{i'=1}^n \underline{\rho}_{j,r,i'}^{(t,b)} \|\boldsymbol{\xi}_{i'}\|_2^{-2} \cdot \langle \boldsymbol{\xi}_{i'}, \boldsymbol{\xi}_i \rangle \\
&= j \cdot \gamma_{j,r}^{(t,b)} \|\boldsymbol{\mu}\|_2^{-2} \cdot \langle \boldsymbol{\mu}, \boldsymbol{\xi}_i \rangle + \frac{1}{P-1} \sum_{i'=1}^n \bar{\rho}_{j,r,i'}^{(t,b)} \|\boldsymbol{\xi}_{i'}\|_2^{-2} \cdot \langle \boldsymbol{\xi}_{i'}, \boldsymbol{\xi}_i \rangle \\
&= \frac{1}{P-1} \bar{\rho}_{j,r,i}^{(t,b)} + j \cdot \gamma_{j,r}^{(t,b)} \|\boldsymbol{\mu}\|_2^{-2} \cdot \langle \boldsymbol{\mu}, \boldsymbol{\xi}_i \rangle + \frac{1}{P-1} \sum_{i' \neq i} \bar{\rho}_{j,r,i'}^{(t,b)} \|\boldsymbol{\xi}_{i'}\|_2^{-2} \cdot \langle \boldsymbol{\xi}_{i'}, \boldsymbol{\xi}_i \rangle,
\end{aligned}$$

480 and

$$\left| j \cdot \gamma_{j,r}^{(t,b)} \|\boldsymbol{\mu}\|_2^{-2} \cdot \langle \boldsymbol{\mu}, \boldsymbol{\xi}_i \rangle + \sum_{i' \neq i} \bar{\rho}_{j,r,i'}^{(t,b)} \|\boldsymbol{\xi}_{i'}\|_2^{-2} \cdot \langle \boldsymbol{\xi}_{i'}, \boldsymbol{\xi}_i \rangle \right|$$

$$\begin{aligned}
&\leq \frac{\text{SNR}^{-1}}{P-1} \sqrt{\frac{2 \log(6n/\delta)}{d}} |\gamma_{j,r}^{(t,b)}| + \frac{4}{P-1} \sqrt{\frac{\log(6n^2/\delta)}{d}} \sum_{i' \neq i} |\bar{\rho}_{j,r,i'}^{(t,b)}| \\
&\leq \frac{\text{SNR}}{P-1} \sqrt{\frac{8C^2 \log(6n/\delta)}{d}} n\alpha + \frac{4}{P-1} \sqrt{\frac{\log(6n^2/\delta)}{d}} n\alpha \\
&\leq \frac{5}{P-1} \sqrt{\frac{\log(6n^2/\delta)}{d}} n\alpha,
\end{aligned}$$

481 where the second inequality is by (25) and (27), and the third inequality is by  $\text{SNR} \leq 1/\sqrt{8C'^2}$ .  
482 Therefore, for  $j = y_i$ , we have

$$|\langle \mathbf{w}_{j,r}^{(t,b)} - \mathbf{w}_{j,r}^{(0,0)}, \boldsymbol{\xi}_i \rangle - \frac{1}{P-1} \bar{\rho}_{j,r,i}^{(t,b)}| \leq \frac{5}{P-1} \sqrt{\frac{\log(6n^2/\delta)}{d}} n\alpha.$$

483 □

484 **Lemma B.4.** Under Condition 3.1, suppose (25), (26) and (27) hold after  $b$ -th batch of  $t$ -th epoch.  
485 Then, for all  $j \neq y_i$ ,  $j \in \{\pm 1\}$  and  $i \in [n]$ ,  $F_j(\mathbf{W}_j^{(t,b)}, \mathbf{x}_i) \leq 0.5$ .

486 *Proof of Lemma B.4.* According to Lemma B.3, we have

$$\begin{aligned}
F_j(\mathbf{W}_j^{(t,b)}, \mathbf{x}_i) &= \frac{1}{m} \sum_{r=1}^m [\sigma(\langle \mathbf{w}_{j,r}^{(t,b)}, y_i \boldsymbol{\mu} \rangle) + (P-1) \sigma(\langle \mathbf{w}_{j,r}^{(t,b)}, \boldsymbol{\xi}_i \rangle)] \\
&\leq 2 \max\{\langle \mathbf{w}_{j,r}^{(t,b)}, y_i \boldsymbol{\mu} \rangle, (P-1) \langle \mathbf{w}_{j,r}^{(t,b)}, \boldsymbol{\xi}_i \rangle, 0\} \\
&\leq 6 \max\left\{\langle \mathbf{w}_{j,r}^{(0)}, y_i \boldsymbol{\mu} \rangle, (P-1) \langle \mathbf{w}_{j,r}^{(0)}, \boldsymbol{\xi}_i \rangle, \text{SNR} \sqrt{\frac{32 \log(6n/\delta)}{d}} n\alpha, y_i j \gamma_{j,r}^{(t,b)}, \right. \\
&\quad \left. 5 \sqrt{\frac{\log(6n^2/\delta)}{d}} n\alpha + \bar{\rho}_{j,r,i}^{(t,b)}\right\} \\
&\leq 6 \max\left\{\beta/2, \text{SNR} \sqrt{\frac{32 \log(6n/\delta)}{d}} n\alpha, -\gamma_{j,r}^{(t,b)}, 5 \sqrt{\frac{\log(6n^2/\delta)}{d}} n\alpha\right\} \\
&\leq 0.5,
\end{aligned}$$

487 where the second inequality is by (28), (29) and (30); the third inequality is due to the definition of  $\beta$   
488 and  $\bar{\rho}_{j,r,i}^{(t,b)} < 0$ ; the third inequality is by (23) and  $-\gamma_{j,r}^{(t,b)} \leq \frac{1}{12}$ .

489 □

490 **Lemma B.5.** Under Condition 3.1, suppose (25), (26) and (27) hold at  $b$ -th batch of  $t$ -th epoch.  
491 Then, it holds that

$$\begin{aligned}
(P-1) \langle \mathbf{w}_{y_i,r}^{(t,b)}, \boldsymbol{\xi}_i \rangle &\geq -0.25, \\
(P-1) \langle \mathbf{w}_{y_i,r}^{(t,b)}, \boldsymbol{\xi}_i \rangle &\leq (P-1) \sigma(\langle \mathbf{w}_{y_i,r}^{(t,b)}, \boldsymbol{\xi}_i \rangle) \leq (P-1) \langle \mathbf{w}_{y_i,r}^{(t,b)}, \boldsymbol{\xi}_i \rangle + 0.25,
\end{aligned}$$

492 for any  $i \in [n]$ .

493 *Proof of Lemma B.5.* According to (30) in Lemma B.3, we have

$$\begin{aligned}
(P-1) \langle \mathbf{w}_{y_i,r}^{(t,b)}, \boldsymbol{\xi}_i \rangle &\geq (P-1) \langle \mathbf{w}_{y_i,r}^{(0,0)}, \boldsymbol{\xi}_i \rangle + \bar{\rho}_{y_i,r,i}^{(t,b)} - 5n \sqrt{\frac{\log(6n^2/\delta)}{d}} \alpha \\
&\geq -\beta - 5n \sqrt{\frac{\log(6n^2/\delta)}{d}} \alpha \\
&\geq -0.25,
\end{aligned}$$

494 where the second inequality is due to  $\bar{\rho}_{y_i,r,i}^{(t,b)} \geq 0$ , the third inequality is due to  $\beta < 1/8$  and  
495  $5n \sqrt{\log(6n^2/\delta)/d} \cdot \alpha < 1/8$  by Condition 3.1.

496 For the second equation, the first inequality holds naturally since  $z \leq \sigma(z)$ . For the inequality, if  
 497  $\langle \mathbf{w}_{y_i, r}^{(t)}, \boldsymbol{\xi}_i \rangle \leq 0$ , we have

$$(P-1)\sigma(\langle \mathbf{w}_{y_i, r}^{(t, b)}, \boldsymbol{\xi}_i \rangle) = 0 \leq (P-1)\langle \mathbf{w}_{y_i, r}^{(t, b)}, \boldsymbol{\xi}_i \rangle + 0.25.$$

498 And if  $\langle \mathbf{w}_{y_i, r}^{(t, b)}, \boldsymbol{\xi}_i \rangle > 0$ , we have

$$(P-1)\sigma(\langle \mathbf{w}_{y_i, r}^{(t, b)}, \boldsymbol{\xi}_i \rangle) = (P-1)\langle \mathbf{w}_{y_i, r}^{(t, b)}, \boldsymbol{\xi}_i \rangle < (P-1)\langle \mathbf{w}_{y_i, r}^{(t, b)}, \boldsymbol{\xi}_i \rangle + 0.25.$$

499

□

500 **Lemma B.6** (Lemma C.6 in Kou et al. (2023)). *Let  $g(z) = \ell'(z) = -1/(1 + \exp(z))$ , then for all*  
 501  *$z_2 - c \geq z_1 \geq -1$  where  $c \geq 0$  we have that*

$$\frac{\exp(c)}{4} \leq \frac{g(z_1)}{g(z_2)} \leq \exp(c).$$

502 **Lemma B.7.** *For any iteration  $t \in [0, T^*)$  and  $b, b_1, b_2 \in \overline{[H]}$ , we have the following statements*  
 503 *hold:*

504 1.  $\left| \sum_{r=1}^m [\bar{\rho}_{y_i, r, i}^{(t, 0)} - \bar{\rho}_{y_k, r, k}^{(t, 0)}] - \sum_{r=1}^m [\bar{\rho}_{y_i, r, i}^{(t, b_1)} - \bar{\rho}_{y_k, r, k}^{(t, b_2)}] \right| \leq 0.1\kappa.$

505 2.  $\langle \mathbf{w}_{y_i, r}^{(t, b)}, \boldsymbol{\xi}_i \rangle \geq \langle \mathbf{w}_{y_i, r}^{(t, 0)}, \boldsymbol{\xi}_i \rangle - \sigma_0 \sigma_p \sqrt{d}/\sqrt{2}$

506 3. Let  $\tilde{S}_i^{(t, b)} = \{r \in [m] : \langle \mathbf{w}_{y_i, r}^{(t, b)}, \boldsymbol{\xi}_i \rangle > 0\}$ , then we have

$$S_i^{(t, 0)} \subseteq \tilde{S}_i^{(t, b)}$$

507 4. Let  $\tilde{S}_{j, r}^{(t, b)} = \{i \in [n] : y_i = j, \langle \mathbf{w}_{j, r}^{(t, b)}, \boldsymbol{\xi}_i \rangle > 0\}$ , then we have

$$S_{j, r}^{(t, 0)} \subseteq \tilde{S}_{j, r}^{(t, b)}$$

508 *Proof.* For the first statement,

$$\begin{aligned} & \left| \sum_{r=1}^m [\bar{\rho}_{y_i, r, i}^{(t, 0)} - \bar{\rho}_{y_k, r, k}^{(t, 0)}] - \sum_{r=1}^m [\bar{\rho}_{y_i, r, i}^{(t, b_1)} - \bar{\rho}_{y_k, r, k}^{(t, b_2)}] \right| \\ & \leq \frac{\eta(P-1)^2}{Bm} \max \left\{ |S_i^{(\tilde{t}-1, b_1)}| \|\ell_i'(\tilde{t}-1, b_1)\| \cdot \|\boldsymbol{\xi}_i\|_2^2, |S_k^{(\tilde{t}-1, b_2)}| \|\ell_k'(\tilde{t}-1, b_2)\| \cdot \|\boldsymbol{\xi}_k\|_2^2 \right\} \\ & \leq \frac{\eta(P-1)^2}{B} \frac{3\sigma_p^2 d}{2} \\ & \leq 0.1\kappa, \end{aligned}$$

509 where the first inequality follows from the iterative update rule of  $\bar{\rho}_{j, r, i}^{(t, b)}$ , the second inequality is due  
 510 to Lemma A.2, and the last inequality is due to Condition 3.1.

511 For the second statement, recall that the stochastic gradient update rule is

$$\begin{aligned} \langle \mathbf{w}_{y_i, r}^{(t, b)}, \boldsymbol{\xi}_i \rangle &= \langle \mathbf{w}_{y_i, r}^{(t, b-1)}, \boldsymbol{\xi}_i \rangle - \frac{\eta}{Bm} \cdot \sum_{i' \in \mathcal{I}_{t, b-1}} \ell_{i'}^{(t, b-1)} \cdot \sigma'(\langle \mathbf{w}_{y_i, r}^{(t, b-1)}, y_{i'} \boldsymbol{\mu} \rangle) \cdot \langle y_{i'} \boldsymbol{\mu}, \boldsymbol{\xi}_i \rangle y_{i'} \\ &\quad - \frac{\eta(P-1)}{Bm} \cdot \sum_{i' \in \mathcal{I}_{t, b-1}/i} \ell_{i'}^{(t, b-1)} \cdot \sigma'(\langle \mathbf{w}_{y_i, r}^{(t, b-1)}, \boldsymbol{\xi}_{i'} \rangle) \cdot \langle \boldsymbol{\xi}_{i'}, \boldsymbol{\xi}_i \rangle. \end{aligned}$$

512 Therefore,

$$\begin{aligned} \langle \mathbf{w}_{y_i, r}^{(t, b)}, \boldsymbol{\xi}_i \rangle &\geq \langle \mathbf{w}_{y_i, r}^{(t, 0)}, \boldsymbol{\xi}_i \rangle - \frac{\eta}{Bm} \cdot n \cdot \|\boldsymbol{\mu}\|_2 \sigma_p \sqrt{2 \log(6n/\delta)} - \frac{\eta(P-1)}{Bm} \cdot n \cdot 2\sigma_p^2 \sqrt{d \log(6n^2/\delta)} \\ &\geq \langle \mathbf{w}_{y_i, r}^{(t, 0)}, \boldsymbol{\xi}_i \rangle - \sigma_0 \sigma_p \sqrt{d}/\sqrt{2}, \end{aligned}$$

513 where the first inequality is due to Lemma A.1, and the second inequality is due to Condition 3.1

514 For the third statement. Let  $r^* \in S_i^{(t,0)}$ , then

$$\langle \mathbf{w}_{y_i, r^*}^{(t,b)}, \boldsymbol{\xi}_i \rangle \geq \langle \mathbf{w}_{y_i, r^*}^{(t,0)}, \boldsymbol{\xi}_i \rangle - \sigma_0 \sigma_p \sqrt{d}/\sqrt{2} > 0,$$

515 where the first inequality is due to the second statement, and the second inequality is due to the  
516 definition of  $\tilde{S}_i^{(t,0)}$ . Therefore,  $r^* \in \tilde{S}_i^{(t,b)}$  and  $S_i^{(t,b)} \subseteq \tilde{S}_i^{(t,b)}$ . The forth statement can be obtained  
517 similarly.  $\square$

518 **Lemma B.8.** Under Assumption 3.1, suppose (25), (26) and (27) hold for any iteration  $(t', b') \leq$   
519  $(t, 0)$ . Then, the following conditions also hold for  $\forall t' \leq t$  and  $\forall b', b'_1, b'_2 \in [H]$ :

- 520 1.  $\sum_{r=1}^m [\bar{\rho}_{y_i, r, i}^{(t', 0)} - \bar{\rho}_{y_k, r, k}^{(t', 0)}] \leq \kappa$  for all  $i, k \in [n]$ .
- 521 2.  $y_i \cdot f(\mathbf{W}^{(t', b'_1)}, \mathbf{x}_i) - y_k \cdot f(\mathbf{W}^{(t', b'_2)}, \mathbf{x}_k) \leq C_1$  for all  $i, k \in [n]$ ,
- 522 3.  $\ell_i^{(t', b'_1)} / \ell_k^{(t', b'_2)} \leq C_2 = \exp(C_1)$  for all  $i, k \in [n]$ .
- 523 4.  $S_i^{(0,0)} \subseteq S_i^{(t', 0)}$ , where  $S_i^{(t', 0)} := \{r \in [m] : \langle \mathbf{w}_{y_i, r}^{(t', 0)}, \boldsymbol{\xi}_i \rangle > \sigma_0 \sigma_p \sqrt{d}/\sqrt{2}\}$ , and hence  
524  $|S_i^{(t', 0)}| \geq 0.8m\Phi(-1)$  for all  $i \in [n]$ .
- 525 5.  $S_{j, r}^{(0,0)} \subseteq S_{j, r}^{(t', 0)}$ , where  $S_{j, r}^{(t', 0)} := \{i \in [n] : y_i = j, \langle \mathbf{w}_{j, r}^{(t', 0)}, \boldsymbol{\xi}_i \rangle > \sigma_0 \sigma_p \sqrt{d}/\sqrt{2}\}$ , and hence  
526  $|S_{j, r}^{(t', 0)}| \geq \Phi(-1)n/4$  for all  $j \in \{\pm 1\}, r \in [m]$ .

527 Here we take  $\kappa$  and  $C_1$  as 10 and 5 respectively.

528 *Proof of Lemma B.8.* We prove Lemma B.8 by induction. When  $t' = 0$ , the fourth and fifth conditions  
529 hold naturally by Lemma A.3 and A.4.

530 For the first condition, since we have  $\bar{\rho}_{j, r, i}^{(0,0)} = 0$  for any  $j, r, i$  according to (24), it is straightforward  
531 that  $\sum_{r=1}^m [\bar{\rho}_{y_i, r, i}^{(0,0)} - \bar{\rho}_{y_k, r, k}^{(0,0)}] = 0$  for all  $i, k \in [n]$ . So the first condition holds for  $t' = 0$ .

532 For the second condition, we have

$$\begin{aligned} & y_i \cdot f(\mathbf{W}^{(0,0)}, \mathbf{x}_i) - y_k \cdot f(\mathbf{W}^{(0,0)}, \mathbf{x}_k) \\ &= F_{y_i}(\mathbf{W}_{y_i}^{(0,0)}, \mathbf{x}_i) - F_{-y_i}(\mathbf{W}_{-y_i}^{(0,0)}, \mathbf{x}_i) + F_{-y_k}(\mathbf{W}_{-y_k}^{(0,0)}, \mathbf{x}_i) - F_{y_k}(\mathbf{W}_{y_k}^{(0,0)}, \mathbf{x}_i) \\ &\leq F_{y_i}(\mathbf{W}_{y_i}^{(0,0)}, \mathbf{x}_i) + F_{-y_k}(\mathbf{W}_{-y_k}^{(0,0)}, \mathbf{x}_i) \\ &= \frac{1}{m} \sum_{r=1}^m [\sigma(\langle \mathbf{w}_{y_i, r}^{(0,0)}, y_i \boldsymbol{\mu} \rangle) + (P-1)\sigma(\langle \mathbf{w}_{y_i, r}^{(0,0)}, \boldsymbol{\xi}_i \rangle)] \\ &\quad + \frac{1}{m} \sum_{r=1}^m [\sigma(\langle \mathbf{w}_{-y_k, r}^{(0,0)}, y_k \boldsymbol{\mu} \rangle) + (P-1)\sigma(\langle \mathbf{w}_{-y_k, r}^{(0,0)}, \boldsymbol{\xi}_i \rangle)] \\ &\leq 4\beta \leq 1/3 \leq C_1, \end{aligned}$$

533 where the first inequality is by  $F_j(\mathbf{W}_j^{(0,0)}, \mathbf{x}_i) > 0$ , the second inequality is due to (21), and the  
534 third inequality is due to (23).

535 By Lemma B.6 and the second condition, the third condition can be obtained directly as

$$\frac{\ell_i^{(0,0)}}{\ell_k^{(0,0)}} \leq \exp(y_k \cdot f(\mathbf{W}^{(0,0)}, \mathbf{x}_k) - y_i \cdot f(\mathbf{W}^{(0,0)}, \mathbf{x}_i)) \leq \exp(C_1).$$

536 Now suppose there exists  $(\tilde{t}, \tilde{b}) \leq (t, b)$  such that these five conditions hold for any  $(0, 0) \leq (t', b') <$   
537  $(\tilde{t}, \tilde{b})$ . We aim to prove that these conditions also hold for  $(t', b') = (\tilde{t}, \tilde{b})$ .

538 We first show that, for any  $0 \leq t' \leq t$  and  $0 \leq b'_1, b'_2 \leq b$ ,  $y_i \cdot f(\mathbf{W}^{(t', b'_1)}, \mathbf{x}_i) - y_k \cdot f(\mathbf{W}^{(t', b'_2)}, \mathbf{x}_k)$   
539 can be approximated by  $\frac{1}{m} \sum_{r=1}^m [\bar{\rho}_{y_i, r, i}^{(t', b'_1)} - \bar{\rho}_{y_k, r, k}^{(t', b'_2)}]$  with a small constant approximation error. We  
540 begin by writing out

$$\begin{aligned}
& y_i \cdot f(\mathbf{W}^{(t', b'_1)}, \mathbf{x}_i) - y_k \cdot f(\mathbf{W}^{(t', b'_2)}, \mathbf{x}_k) \\
&= y_i \sum_{j \in \{\pm 1\}} j \cdot F_j(\mathbf{W}_j^{(t', b'_1)}, \mathbf{x}_i) - y_k \sum_{j \in \{\pm 1\}} j \cdot F_j(\mathbf{W}_j^{(t', b'_2)}, \mathbf{x}_k) \\
&= F_{-y_k}(\mathbf{W}_{-y_k}^{(t', b'_2)}, \mathbf{x}_k) - F_{-y_i}(\mathbf{W}_{-y_i}^{(t', b'_1)}, \mathbf{x}_i) + F_{y_i}(\mathbf{W}_{y_i}^{(t', b'_1)}, \mathbf{x}_i) - F_{y_k}(\mathbf{W}_{y_k}^{(t', b'_2)}, \mathbf{x}_k) \\
&= F_{-y_k}(\mathbf{W}_{-y_k}^{(t', b'_2)}, \mathbf{x}_k) - F_{-y_i}(\mathbf{W}_{-y_i}^{(t', b'_1)}, \mathbf{x}_i) \\
&\quad + \frac{1}{m} \sum_{r=1}^m [\sigma(\langle \mathbf{w}_{y_i, r}^{(t', b'_1)}, y_i \cdot \boldsymbol{\mu} \rangle) + (P-1)\sigma(\langle \mathbf{w}_{y_i, r}^{(t', b'_1)}, \boldsymbol{\xi}_i \rangle)] \\
&\quad - \frac{1}{m} \sum_{r=1}^m [\sigma(\langle \mathbf{w}_{y_k, r}^{(t', b'_2)}, y_k \cdot \boldsymbol{\mu} \rangle) + (P-1)\sigma(\langle \mathbf{w}_{y_k, r}^{(t', b'_2)}, \boldsymbol{\xi}_k \rangle)] \\
&= \underbrace{F_{-y_k}(\mathbf{W}_{-y_k}^{(t', b'_2)}, \mathbf{x}_k) - F_{-y_i}(\mathbf{W}_{-y_i}^{(t', b'_1)}, \mathbf{x}_i)}_{\text{I}_1} \\
&\quad + \underbrace{\frac{1}{m} \sum_{r=1}^m [\sigma(\langle \mathbf{w}_{y_i, r}^{(t', b'_1)}, y_i \cdot \boldsymbol{\mu} \rangle) - \sigma(\langle \mathbf{w}_{y_k, r}^{(t', b'_2)}, y_k \cdot \boldsymbol{\mu} \rangle)]}_{\text{I}_2} \\
&\quad + \underbrace{\frac{1}{m} \sum_{r=1}^m [(P-1)\sigma(\langle \mathbf{w}_{y_i, r}^{(t', b'_1)}, \boldsymbol{\xi}_i \rangle) - (P-1)\sigma(\langle \mathbf{w}_{y_k, r}^{(t', b'_2)}, \boldsymbol{\xi}_k \rangle)]}_{\text{I}_3},
\end{aligned} \tag{31}$$

541 where all the equalities are due to the network definition. Then we bound  $\text{I}_1$ ,  $\text{I}_2$  and  $\text{I}_3$ .

542 For  $|\text{I}_1|$ , we have the following upper bound by Lemma B.4:

$$\begin{aligned}
|\text{I}_1| &\leq |F_{-y_k}(\mathbf{W}_{-y_k}^{(t', b'_2)}, \mathbf{x}_k)| + |F_{-y_i}(\mathbf{W}_{-y_i}^{(t', b'_1)}, \mathbf{x}_i)| \\
&= F_{-y_k}(\mathbf{W}_{-y_k}^{(t', b'_2)}, \mathbf{x}_k) + F_{-y_i}(\mathbf{W}_{-y_i}^{(t', b'_1)}, \mathbf{x}_i) \\
&\leq 1.
\end{aligned} \tag{32}$$

543 For  $|\text{I}_2|$ , we have the following upper bound:

$$\begin{aligned}
|\text{I}_2| &\leq \max \left\{ \frac{1}{m} \sum_{r=1}^m \sigma(\langle \mathbf{w}_{y_i, r}^{(t', b'_1)}, y_i \cdot \boldsymbol{\mu} \rangle), \frac{1}{m} \sum_{r=1}^m \sigma(\langle \mathbf{w}_{y_k, r}^{(t', b'_2)}, y_k \cdot \boldsymbol{\mu} \rangle) \right\} \\
&\leq 3 \max \left\{ |\langle \mathbf{w}_{y_i, r}^{(0,0)}, y_i \cdot \boldsymbol{\mu} \rangle|, |\langle \mathbf{w}_{y_k, r}^{(0,0)}, y_k \cdot \boldsymbol{\mu} \rangle|, \gamma_{j, r}^{(t', b'_1)}, \gamma_{j, r}^{(t', b'_2)}, \text{SNR} \sqrt{\frac{32 \log(6n/\delta)}{d}} n\alpha \right\} \\
&\leq 3 \max \left\{ \beta, C' \hat{\gamma} \alpha, \text{SNR} \sqrt{\frac{32 \log(6n/\delta)}{d}} n\alpha \right\} \\
&\leq 0.25,
\end{aligned} \tag{33}$$

544 where the second inequality is due to (28), the second inequality is due to the definition of  $\beta$  and (27),  
545 the third inequality is due to Condition 3.1 and (23).

546 For  $I_3$ , we have the following upper bound

$$\begin{aligned}
I_3 &= \frac{1}{m} \sum_{r=1}^m [(P-1)\sigma(\langle \mathbf{w}_{y_i,r}^{(t',b'_1)}, \boldsymbol{\xi}_i \rangle) - (P-1)\sigma(\langle \mathbf{w}_{y_k,r}^{(t',b'_2)}, \boldsymbol{\xi}_k \rangle)] \\
&\leq \frac{1}{m} \sum_{r=1}^m [(P-1)\langle \mathbf{w}_{y_i,r}^{(t',b'_1)}, \boldsymbol{\xi}_i \rangle - (P-1)\langle \mathbf{w}_{y_k,r}^{(t',b'_2)}, \boldsymbol{\xi}_k \rangle] + 0.25 \\
&\leq \frac{1}{m} \sum_{r=1}^m \left[ \bar{\rho}_{y_i,r,i}^{(t',b'_1)} - \bar{\rho}_{y_k,r,k}^{(t',b'_2)} + 10\sqrt{\frac{\log(6n^2/\delta)}{d}}n\alpha \right] + 0.25 \\
&\leq \frac{1}{m} \sum_{r=1}^m [\bar{\rho}_{y_i,r,i}^{(t',b'_1)} - \bar{\rho}_{y_k,r,k}^{(t',b'_2)}] + 0.5,
\end{aligned} \tag{34}$$

547 where the first inequality is due to Lemma B.5, the second inequality is due to Lemma B.3, the third  
548 inequality is due to  $5\sqrt{\log(6n^2/\delta)/dn\alpha} \leq 1/8$  according to Condition 3.1.

549 Similarly, we have the following lower bound

$$\begin{aligned}
I_3 &= \frac{1}{m} \sum_{r=1}^m [(P-1)\sigma(\langle \mathbf{w}_{y_i,r}^{(t',b'_1)}, \boldsymbol{\xi}_i \rangle) - (P-1)\sigma(\langle \mathbf{w}_{y_k,r}^{(t',b'_2)}, \boldsymbol{\xi}_k \rangle)] \\
&\geq \frac{1}{m} \sum_{r=1}^m [(P-1)\langle \mathbf{w}_{y_i,r}^{(t',b'_1)}, \boldsymbol{\xi}_i \rangle - (P-1)\langle \mathbf{w}_{y_k,r}^{(t',b'_2)}, \boldsymbol{\xi}_k \rangle] - 0.25 \\
&\geq \frac{1}{m} \sum_{r=1}^m \left[ \bar{\rho}_{y_i,r,i}^{(t',b'_1)} - \bar{\rho}_{y_k,r,k}^{(t',b'_2)} - 10\sqrt{\frac{\log(6n^2/\delta)}{d}}n\alpha \right] - 0.25 \\
&\geq \frac{1}{m} \sum_{r=1}^m [\bar{\rho}_{y_i,r,i}^{(t',b'_1)} - \bar{\rho}_{y_k,r,k}^{(t',b'_2)}] - 0.5,
\end{aligned} \tag{35}$$

550 where the first inequality is due to Lemma B.5, the second inequality is due to Lemma B.3, the third  
551 inequality is due to  $5\sqrt{\log(6n^2/\delta)/dn\alpha} \leq 1/8$  according to Condition 3.1.

552 By plugging (32)-(34) into (31), we have

$$\begin{aligned}
y_i \cdot f(\mathbf{W}^{(t',b'_1)}, \mathbf{x}_i) - y_k \cdot f(\mathbf{W}^{(t',b'_2)}, \mathbf{x}_k) &\leq |I_1| + |I_2| + I_3 \\
&\leq \frac{1}{m} \sum_{r=1}^m [\bar{\rho}_{y_i,r,i}^{(t',b'_1)} - \bar{\rho}_{y_k,r,k}^{(t',b'_2)}] + 1.75 \\
y_i \cdot f(\mathbf{W}^{(t',b'_1)}, \mathbf{x}_i) - y_k \cdot f(\mathbf{W}^{(t',b'_2)}, \mathbf{x}_k) &\geq -|I_1| - |I_2| + I_3 \\
&\geq \frac{1}{m} \sum_{r=1}^m [\bar{\rho}_{y_i,r,i}^{(t',b'_1)} - \bar{\rho}_{y_k,r,k}^{(t',b'_2)}] - 1.75,
\end{aligned}$$

553 which is equivalent to

$$\left| y_i \cdot f(\mathbf{W}^{(t',b'_1)}, \mathbf{x}_i) - y_k \cdot f(\mathbf{W}^{(t',b'_2)}, \mathbf{x}_k) - \frac{1}{m} \sum_{r=1}^m [\bar{\rho}_{y_i,r,i}^{(t',b'_1)} - \bar{\rho}_{y_k,r,k}^{(t',b'_2)}] \right| \leq 1.75. \tag{36}$$

554 Therefore, the second condition immediately follows from the first condition.

555 Then, we prove the first condition holds for  $(\tilde{t}, \tilde{b})$ . Recall that from Lemma B.1 that

$$\bar{\rho}_{j,r,i}^{(t,b+1)} = \bar{\rho}_{j,r,i}^{(t,b)} - \frac{\eta(P-1)^2}{Bm} \cdot \ell_i^{(t,b)} \cdot \sigma'(\langle \mathbf{w}_{j,r}^{(t,b)}, \boldsymbol{\xi}_i \rangle) \cdot \|\boldsymbol{\xi}_i\|_2^2 \cdot \mathbb{1}(y_i = j) \mathbb{1}(i \in \mathcal{I}_{t,b})$$

556 for all  $j \in \{\pm 1\}$ ,  $r \in [m]$ ,  $i \in [n]$ ,  $(0, 0) \leq (t, b) < [T^*, 0]$ . It follows that

$$\sum_{r=1}^m [\bar{\rho}_{y_i,r,i}^{(t,b+1)} - \bar{\rho}_{y_k,r,k}^{(t,b+1)}]$$

$$= \sum_{r=1}^m [\bar{\rho}_{y_i, r, i}^{(t, b)} - \bar{\rho}_{y_k, r, k}^{(t, b)}] - \frac{\eta(P-1)^2}{Bm} \cdot \left( |\tilde{S}_i^{(t, b)}| \ell_i'^{(t, b)} \cdot \|\xi_i\|_2^2 \mathbf{1}(i \in \mathcal{I}_{t, b}) \right. \\ \left. - |\tilde{S}_k^{(t, b)}| \ell_k'^{(t, b)} \cdot \|\xi_k\|_2^2 \mathbf{1}(k \in \mathcal{I}_{t, b}) \right),$$

for all  $i, k \in [n]$  and  $0 \leq t \leq T^*$ ,  $b < H$ .

If  $\tilde{b} \in \{1, 2, \dots, H-1\}$ , then the first statement for  $(t', b') = (\tilde{t}, \tilde{b})$  and for the last  $(t', b') < (\tilde{t}, \tilde{b})$  are the same. Otherwise, if  $\tilde{b} = 0$ , we consider two separate cases:  $\sum_{r=1}^m [\bar{\rho}_{y_i, r, i}^{(\tilde{t}-1, 0)} - \bar{\rho}_{y_k, r, k}^{(\tilde{t}-1, 0)}] \leq 0.9\kappa$  and  $\sum_{r=1}^m [\bar{\rho}_{y_i, r, i}^{(\tilde{t}-1, 0)} - \bar{\rho}_{y_k, r, k}^{(\tilde{t}-1, 0)}] > 0.9\kappa$ .

When  $\sum_{r=1}^m [\bar{\rho}_{y_i, r, i}^{(\tilde{t}-1, 0)} - \bar{\rho}_{y_k, r, k}^{(\tilde{t}-1, 0)}] \leq 0.9\kappa$ , we have

$$\begin{aligned} & \sum_{r=1}^m [\bar{\rho}_{y_i, r, i}^{(\tilde{t}, 0)} - \bar{\rho}_{y_k, r, k}^{(\tilde{t}, 0)}] \\ &= \sum_{r=1}^m [\bar{\rho}_{y_i, r, i}^{(\tilde{t}-1, 0)} - \bar{\rho}_{y_k, r, k}^{(\tilde{t}-1, 0)}] - \frac{\eta(P-1)^2}{Bm} \cdot \left( |\tilde{S}_i^{(\tilde{t}-1, b_i^{(\tilde{t}-1)})}| \ell_i'^{(\tilde{t}-1, b_i^{(\tilde{t}-1)})} \cdot \|\xi_i\|_2^2 \right. \\ & \quad \left. - |\tilde{S}_k^{(\tilde{t}-1, b_k^{(\tilde{t}-1)})}| \ell_k'^{(\tilde{t}-1, b_k^{(\tilde{t}-1)})} \cdot \|\xi_k\|_2^2 \right) \\ &\leq \sum_{r=1}^m [\bar{\rho}_{y_i, r, i}^{(\tilde{t}-1, 0)} - \bar{\rho}_{y_k, r, k}^{(\tilde{t}-1, 0)}] - \frac{\eta(P-1)^2}{Bm} \cdot |\tilde{S}_i^{(\tilde{t}-1, b_i^{(\tilde{t}-1)})}| \ell_i'^{(\tilde{t}-1, b_i^{(\tilde{t}-1)})} \cdot \|\xi_i\|_2^2 \\ &\leq \sum_{r=1}^m [\bar{\rho}_{y_i, r, i}^{(\tilde{t}-1, 0)} - \bar{\rho}_{y_k, r, k}^{(\tilde{t}-1, 0)}] + \frac{\eta(P-1)^2}{B} \cdot \|\xi_i\|_2^2 \\ &\leq 0.9\kappa + 0.1\kappa \\ &= \kappa, \end{aligned}$$

where the first inequality is due to  $\ell_i'^{(\tilde{t}-1, b_i^{(\tilde{t}-1)})} < 0$ ; the second inequality is due to  $|\tilde{S}_i^{(\tilde{t}-1, b_i^{(\tilde{t}-1)})}| \leq m$  and  $-\ell_i'^{(\tilde{t}-1, b_i^{(\tilde{t}-1)})} < 1$ ; the third inequality is due to Condition 3.1.

On the other hand, for when  $\sum_{r=1}^m [\bar{\rho}_{y_i, r, i}^{(\tilde{t}-1, 0)} - \bar{\rho}_{y_k, r, k}^{(\tilde{t}-1, 0)}] > 0.9\kappa$ , we have from the (36) that

$$\begin{aligned} & y_i \cdot f(\mathbf{W}^{(\tilde{t}-1, b_i^{(\tilde{t}-1)})}, \mathbf{x}_i) - y_k \cdot f(\mathbf{W}^{(\tilde{t}-1, b_k^{(\tilde{t}-1)})}, \mathbf{x}_k) \\ &\geq \frac{1}{m} \sum_{r=1}^m [\bar{\rho}_{y_i, r, i}^{(\tilde{t}-1, b_i^{(\tilde{t}-1)})} - \bar{\rho}_{y_k, r, k}^{(\tilde{t}-1, b_k^{(\tilde{t}-1)})}] - 1.75 \\ &\geq \frac{1}{m} \sum_{r=1}^m [\bar{\rho}_{y_i, r, i}^{(\tilde{t}-1, 0)} - \bar{\rho}_{y_k, r, k}^{(\tilde{t}-1, 0)}] - 0.1\kappa - 1.75 \\ &\geq 0.9\kappa - 0.1\kappa - 0.54\kappa \\ &= 0.26\kappa, \end{aligned} \tag{37}$$

where the second inequality is due to  $\kappa = 10$ . Thus, according to Lemma B.6, we have

$$\frac{\ell_i'^{(\tilde{t}-1, b_i^{(\tilde{t}-1)})}}{\ell_k'^{(\tilde{t}-1, b_k^{(\tilde{t}-1)})}} \leq \exp(y_k \cdot f(\mathbf{W}^{(\tilde{t}-1, b_k^{(\tilde{t}-1)})}, \mathbf{x}_k) - y_i \cdot f(\mathbf{W}^{(\tilde{t}-1, b_i^{(\tilde{t}-1)})}, \mathbf{x}_i)) \leq \exp(-0.26\kappa).$$

Since  $S_i^{(\tilde{t}-1, 0)} \subseteq \tilde{S}_i^{(\tilde{t}-1, b_i^{(\tilde{t}-1)})}$ , we have  $|\tilde{S}_k^{(\tilde{t}-1, b_k^{(\tilde{t}-1)})}| \geq 0.8\Phi(-1)m$  according to the fourth condition. Also we have that  $|S_i^{(\tilde{t}-1, b_i^{(\tilde{t}-1)})}| \leq m$ . It follows that

$$\frac{|S_i^{(\tilde{t}-1, b_i^{(\tilde{t}-1)})}| \ell_i'^{(\tilde{t}-1, b_i^{(\tilde{t}-1)})}}{|S_k^{(\tilde{t}-1, b_k^{(\tilde{t}-1)})}| \ell_k'^{(\tilde{t}-1, b_k^{(\tilde{t}-1)})}} \leq \frac{\exp(-0.26\kappa)}{0.8\Phi(-1)} < 0.8.$$

568 According to Lemma A.1, under event  $\mathcal{E}_{\text{prelim}}$ , we have

$$\|\xi_i\|_2^2 - d \cdot \sigma_p^2 = O(\sigma_p^2 \cdot \sqrt{d \log(6n/\delta)}), \forall i \in [n].$$

569 Note that  $d = \Omega(\log(6n/\delta))$  from Condition 3.1, it follows that

$$|S_i^{(\tilde{t}, b_i^{(\tilde{t}-1)})}(-\ell_i^{(\tilde{t}, b_i^{(\tilde{t}-1)})}) \cdot \|\xi_i\|_2^2| < |S_k^{(\tilde{t}, b_k^{(\tilde{t}-1)})}(-\ell_k^{(\tilde{t}, b_k^{(\tilde{t}-1)})}) \cdot \|\xi_k\|_2^2|.$$

570 Then we have

$$\sum_{r=1}^m [\bar{\rho}_{y_i, r, i}^{(\tilde{t}, 0)} - \bar{\rho}_{y_k, r, k}^{(\tilde{t}, 0)}] \leq \sum_{r=1}^m [\bar{\rho}_{y_i, r, i}^{(\tilde{t}-1, 0)} - \bar{\rho}_{y_k, r, k}^{(\tilde{t}-1, 0)}] \leq \kappa,$$

571 which completes the proof of the first hypothesis at iteration  $(t', b') = (\tilde{t}, \tilde{b})$ . Next, by applying the  
 572 approximation in (36), we are ready to verify the second hypothesis at iteration  $(\tilde{t}, \tilde{b})$ . In fact, for any  
 573  $(t', b'_1), (t', b'_2) \leq (\tilde{t}, \tilde{b})$ , we have

$$\begin{aligned} y_i \cdot f(\mathbf{W}^{(t', b'_1)}, \mathbf{x}_i) - y_k \cdot f(\mathbf{W}^{(t', b'_2)}, \mathbf{x}_k) &\leq \frac{1}{m} \sum_{r=1}^m [\bar{\rho}_{y_i, r, i}^{(t', b'_1)} - \bar{\rho}_{y_k, r, k}^{(t', b'_2)}] + 1.75 \\ &\leq \frac{1}{m} \sum_{r=1}^m [\bar{\rho}_{y_i, r, i}^{(t', 0)} - \bar{\rho}_{y_k, r, k}^{(t', 0)}] + 0.1\kappa + 1.75 \\ &\leq C_1, \end{aligned}$$

574 where the first inequality is by (36); the last inequality is by induction hypothesis and taking  $\kappa$  as 10  
 575 and  $C_1$  as 5.

576 And the third hypothesis directly follows by noting that, for any  $(t', b'_1), (t', b'_2) \leq (\tilde{t}, \tilde{b})$ ,

$$\frac{\ell_i^{(t', b'_1)}}{\ell_k^{(t', b'_2)}} \leq \exp(y_k \cdot f(\mathbf{W}^{(t', b'_1)}, \mathbf{x}_k) - y_i \cdot f(\mathbf{W}^{(t', b'_2)}, \mathbf{x}_i)) \leq \exp(C_1) = C_2.$$

577 For the fourth hypothesis, If  $\tilde{b} \in \{1, 2, \dots, H-1\}$ , then the first statement for  $(t', b') = (\tilde{t}, \tilde{b})$  and  
 578 for the last  $(t', b') < (\tilde{t}, \tilde{b})$  are the same. Otherwise, if  $\tilde{b} = 0$ , according to the gradient descent rule,  
 579 we have

$$\begin{aligned} \langle \mathbf{w}_{y_i, r}^{(\tilde{t}, 0)}, \xi_i \rangle &= \langle \mathbf{w}_{y_i, r}^{(\tilde{t}-1, 0)}, \xi_i \rangle - \frac{\eta}{Bm} \cdot \sum_{b'=0}^{H-1} \sum_{i' \in \mathcal{I}_{\tilde{t}-1, b'}} \ell_{i'}^{(\tilde{t}-1, \tilde{b})} \cdot \sigma'(\langle \mathbf{w}_{y_i, r}^{(\tilde{t}-1, b')}, y_{i'} \mu \rangle) \cdot \langle y_{i'} \mu, \xi_i \rangle y_{i'} \\ &\quad - \frac{\eta(P-1)}{Bm} \cdot \sum_{b'=0}^{H-1} \sum_{i' \in \mathcal{I}_{\tilde{t}-1, b'}} \ell_{i'}^{(\tilde{t}-1, b')} \cdot \sigma'(\langle \mathbf{w}_{y_i, r}^{(\tilde{t}-1, \tilde{b})}, \xi_{i'} \rangle) \cdot \langle \xi_{i'}, \xi_i \rangle \\ &= \langle \mathbf{w}_{y_i, r}^{(\tilde{t}-1, 0)}, \xi_i \rangle - \frac{\eta}{Bm} \cdot \sum_{b'=0}^{H-1} \sum_{i' \in \mathcal{I}_{\tilde{t}-1, b'}} \ell_{i'}^{(\tilde{t}-1, b')} \cdot \sigma'(\langle \mathbf{w}_{y_i, r}^{(\tilde{t}-1, b')}, \hat{y}_{i'} \mu \rangle) \cdot \langle y_{i'} \mu, \xi_i \rangle y_{i'} \\ &\quad - \frac{\eta(P-1)}{Bm} \cdot \ell_i^{(\tilde{t}-1, b_i^{(\tilde{t}-1)})} \cdot \sigma'(\langle \mathbf{w}_{y_i, r}^{(\tilde{t}-1, \tilde{b})}, \xi_i \rangle) \cdot \|\xi_i\|_2^2 \\ &\quad - \frac{\eta(P-1)}{Bm} \cdot \sum_{b'=0}^{H-1} \sum_{i' \in \mathcal{I}_{\tilde{t}-1, b'}} \ell_{i'}^{(\tilde{t}, b')} \cdot \sigma'(\langle \mathbf{w}_{y_i, r}^{(\tilde{t}, b')}, \xi_{i'} \rangle) \cdot \langle \xi_{i'}, \xi_i \rangle \mathbb{1}(i' \neq i) \\ &= \langle \mathbf{w}_{y_i, r}^{(\tilde{t}, 0)}, \xi_i \rangle - \underbrace{\frac{\eta(P-1)}{Bm} \cdot \ell_i^{(\tilde{t}-1, b_i^{(\tilde{t}-1)})} \cdot \|\xi_i\|_2^2}_{\text{I}_4} \\ &\quad - \underbrace{\frac{\eta(P-1)}{Bm} \cdot \sum_{b'=0}^{H-1} \sum_{i' \in \mathcal{I}_{\tilde{t}-1, b'}} \ell_{i'}^{(\tilde{t}-1, b')} \cdot \sigma'(\langle \mathbf{w}_{y_i, r}^{(\tilde{t}-1, b')}, \xi_{i'} \rangle) \cdot \langle \xi_{i'}, \xi_i \rangle \mathbb{1}(i' \neq i)}_{\text{I}_5} \end{aligned}$$



$$-\frac{\eta}{Bm} \cdot \underbrace{\sum_{\tilde{b}=0}^{H-1} \sum_{i' \in \mathcal{I}_{\tilde{t}-1, b'}} \ell_{i'}^{(\tilde{t}-1, b')} \cdot \sigma'(\langle \mathbf{w}_{y_{i, r}}^{(\tilde{t}-1, b')}, y_{i'} \boldsymbol{\mu} \rangle) \cdot \langle y_{i'} \boldsymbol{\mu}, \boldsymbol{\xi}_i \rangle y_{i'}}_{I_6},$$

580 for any  $r \in S_i^{(\tilde{t}-1, 0)}$ , where the last equality is by  $\langle \mathbf{w}_{y_{i, r}}^{(\tilde{t}-1, b_i^{(\tilde{t}-1)})}, \boldsymbol{\xi}_i \rangle > 0$ . Then we respectively  
 581 estimate  $I_4, I_5, I_6$ . For  $I_4$ , according to Lemma A.1, we have

$$-I_4 \geq |\ell_i^{(\tilde{t}-1, b_i^{(\tilde{t}-1)})}| \cdot \sigma_p^2 d/2.$$

582 For  $I_5$ , we have following upper bound

$$\begin{aligned} |I_5| &\leq \sum_{b'=0}^{H-1} \sum_{i' \in \mathcal{I}_{\tilde{t}-1, b'}} |\ell_{i'}^{(\tilde{t}-1, b')}| \cdot \sigma'(\langle \mathbf{w}_{y_{i, r}}^{(\tilde{t}-1, b')}, \boldsymbol{\xi}_{i'} \rangle) \cdot |\langle \boldsymbol{\xi}_{i'}, \boldsymbol{\xi}_i \rangle| \mathbb{1}(i' \neq i) \\ &\leq \sum_{b'=0}^{H-1} \sum_{i' \in \mathcal{I}_{\tilde{t}-1, b'}} |\ell_{i'}^{(\tilde{t}-1, b')}| \cdot |\langle \boldsymbol{\xi}_{i'}, \boldsymbol{\xi}_i \rangle| \mathbb{1}(i' \neq i) \\ &\leq \sum_{b'=0}^{H-1} \sum_{i' \in \mathcal{I}_{\tilde{t}-1, b'}} |\ell_{i'}^{(\tilde{t}-1, b')}| \cdot 2\sigma_p^2 \cdot \sqrt{d \log(6n^2/\delta)} \\ &\leq nC_2 |\ell_i^{(\tilde{t}-1, b_i^{(\tilde{t}-1)})}| \cdot 2\sigma_p^2 \cdot \sqrt{d \log(6n^2/\delta)}, \end{aligned}$$

583 where the first inequality is due to triangle inequality, the second inequality is due to  $\sigma'(z) \in \{0, 1\}$ ,  
 584 the third inequality is due to Lemma A.1, the forth inequality is due to the third hypothesis at epoch  
 585  $\tilde{t} - 1$ .

586 For  $I_6$ , we have following upper bound

$$\begin{aligned} |I_6| &\leq \sum_{b'=0}^{H-1} \sum_{i' \in \mathcal{I}_{\tilde{t}-1, b'}} |\ell_{i'}^{(\tilde{t}-1, b')}| \cdot \sigma'(\langle \mathbf{w}_{y_{i, r}}^{(\tilde{t}-1, b')}, y_{i'} \boldsymbol{\mu} \rangle) \cdot |\langle y_{i'} \boldsymbol{\mu}, \boldsymbol{\xi}_i \rangle| \\ &\leq \sum_{b'=0}^{H-1} \sum_{i' \in \mathcal{I}_{\tilde{t}-1, b'}} |\ell_{i'}^{(\tilde{t}-1, b')}| |\langle y_{i'} \boldsymbol{\mu}, \boldsymbol{\xi}_i \rangle| \\ &\leq nC_2 |\ell_i^{(\tilde{t}-1, b_i^{(\tilde{t}-1)})}| \cdot \|\boldsymbol{\mu}\|_2 \sigma_p \sqrt{2 \log(6n/\delta)}, \end{aligned}$$

587 where the first inequality is by triangle inequality; the second inequality is due to  $\sigma'(z) \in \{0, 1\}$ ; the  
 588 third inequality is by Lemma A.1; the last inequality is due to the third hypothesis at epoch  $\tilde{t} - 1$ .

589 Since  $d \geq \max\{32C_2^2 n^2 \cdot \log(6n^2/\delta), 4C_2 n \|\boldsymbol{\mu}\| \sigma_p^{-1} \sqrt{2 \log(6n/\delta)}\}$ , we have  $-(P-1)I_4 \geq$   
 590  $\max\{(P-1)|I_5|/2, |I_6|/2\}$  and hence  $-(P-1)I_4 \geq (P-1)|I_5| + |I_6|$ . It follows that

$$\langle \mathbf{w}_{y_{i, r}}^{(\tilde{t}, 0)}, \boldsymbol{\xi}_i \rangle \geq \langle \mathbf{w}_{y_{i, r}}^{(\tilde{t}-1, 0)}, \boldsymbol{\xi}_i \rangle > \sigma_0 \sigma_p \sqrt{d}/\sqrt{2},$$

591 for any  $r \in S_i^{(\tilde{t}-1, 0)}$ . Therefore,  $S_i^{(0, 0)} \subseteq S_i^{(\tilde{t}-1, 0)} \subseteq S_i^{(\tilde{t}, 0)}$ . And it directly follows by Lemma A.3  
 592 that  $|S_i^{(\tilde{t}, 0)}| \geq 0.8m\Phi(-1)$ ,  $\forall i \in [n]$ .

593 For the fifth hypothesis, similar to the proof of the fourth hypothesis, we also have

$$\begin{aligned} \langle \mathbf{w}_{y_{i, r}}^{(\tilde{t}, 0)}, \boldsymbol{\xi}_i \rangle &= \langle \mathbf{w}_{y_{i, r}}^{(\tilde{t}-1, 0)}, \boldsymbol{\xi}_i \rangle - \underbrace{\frac{\eta(P-1)}{Bm} \cdot \ell_i^{(\tilde{t}-1, b_i^{(\tilde{t}-1)})} \cdot \|\boldsymbol{\xi}_i\|_2^2}_{I_4} \\ &\quad - \underbrace{\frac{\eta(P-1)}{Bm} \cdot \sum_{b'=0}^{H-1} \sum_{i' \in \mathcal{I}_{\tilde{t}, b'}} \ell_{i'}^{(\tilde{t}-1, b')} \cdot \sigma'(\langle \mathbf{w}_{y_{i, r}}^{(\tilde{t}-1, b')}, \boldsymbol{\xi}_{i'} \rangle) \cdot \langle \boldsymbol{\xi}_{i'}, \boldsymbol{\xi}_i \rangle \mathbb{1}(i' \neq i)}_{I_5} \end{aligned}$$

$$- \frac{\eta}{Bm} \cdot \underbrace{\sum_{b'=0}^{H-1} \sum_{i' \in \mathcal{I}_{\tilde{t}-1, b'}} \ell_{i'}^{(\tilde{t}-1, b')} \cdot \sigma'(\langle \mathbf{w}_{y_i, r}^{(\tilde{t}-1, b')}, y_{i'} \boldsymbol{\mu} \rangle) \cdot \langle y_{i'} \boldsymbol{\mu}, \boldsymbol{\xi}_i \rangle y_{i'}}_{I_6},$$

for any  $i \in S_{j, r}^{(\tilde{t}-1, 0)}$ , where the equality holds due to  $\langle \mathbf{w}_{j, r}^{(\tilde{t}-1, b_i^{(\tilde{t}-1)})}, \boldsymbol{\xi}_i \rangle > 0$  and  $y_i = j$ . By applying the same technique used in the proof of the fourth hypothesis, it follows that

$$\langle \mathbf{w}_{j, r}^{(\tilde{t}, 0)}, \boldsymbol{\xi}_i \rangle \geq \langle \mathbf{w}_{j, r}^{(\tilde{t}-1, 0)}, \boldsymbol{\xi}_i \rangle > 0,$$

for any  $i \in S_{j, r}^{(\tilde{t}-1, 0)}$ . Thus, we have  $S_{j, r}^{(0, 0)} \subseteq S_{j, r}^{(\tilde{t}-1, 0)} \subseteq S_{j, r}^{(\tilde{t}, 0)}$ . And it directly follows by Lemma A.4 that  $|S_{j, r}^{(\tilde{t}, 0)}| \geq n\Phi(-1)/4$ .

□

*Proof of Proposition B.2.* Our proof is based on induction. The results are obvious at iteration  $(0, 0)$  as all the coefficients are zero. Suppose that the results in Proposition B.2 hold for all iterations  $(0, 0) \leq (t, b) < (\tilde{t}, \tilde{b})$ . We aim to prove that they also hold for iteration  $(\tilde{t}, \tilde{b})$ .

Firstly, We prove that (26) exists at iteration  $(\tilde{t}, \tilde{b})$ , i.e.,  $\rho_{j, r, i}^{(\tilde{t}, \tilde{b})} \geq -\beta - 10\sqrt{\log(6n^2/\delta)/d} \cdot n\alpha$  for any  $r \in [m]$ ,  $j \in \{\pm 1\}$  and  $i \in [n]$ . Notice that  $\rho_{j, r, i}^{(\tilde{t}, \tilde{b})} = 0$  for  $j = y_i$ , therefore we only need to consider the case that  $j \neq y_i$ . We also only need to consider the case of  $\tilde{b} = b_i^{(\tilde{t})} + 1$  since  $\rho_{j, r, i}^{(\tilde{t}, \tilde{b})}$  doesn't change in other cases according to (19).

When  $\rho_{j, r, t}^{(\tilde{t}, b_i^{(\tilde{t})})} < -0.5\beta - 5\sqrt{\log(6n^2/\delta)/d} \cdot n\alpha$ , by (30) in Lemma B.3 we have that

$$(P-1)\langle \mathbf{w}_{j, r}^{(\tilde{t}, b_i^{(\tilde{t})})}, \boldsymbol{\xi}_i \rangle \leq \rho_{j, r, i}^{(\tilde{t}, b_i^{(\tilde{t})})} + (P-1)\langle \mathbf{w}_{j, r}^{(0, 0)}, \boldsymbol{\xi}_i \rangle + 5\sqrt{\frac{\log(6n^2/\delta)}{d}} n\alpha < 0$$

and thus

$$\begin{aligned} \rho_{j, r, i}^{(\tilde{t}, \tilde{b})} &= \rho_{j, r, i}^{(\tilde{t}, b_i^{(\tilde{t})})} + \frac{\eta(P-1)^2}{Bm} \cdot \ell_i^{(\tilde{t}, b_i^{(\tilde{t})})} \cdot \sigma'(\langle \mathbf{w}_{j, r}^{(\tilde{t}, b_i^{(\tilde{t})})}, \boldsymbol{\xi}_i \rangle) \cdot \|\boldsymbol{\xi}_i\|_2^2 \\ &= \rho_{j, r, i}^{(\tilde{t}, b_i^{(\tilde{t})})} \geq -\beta - 10\sqrt{\frac{\log(6n^2/\delta)}{d}} n\alpha, \end{aligned}$$

where the last inequality is by induction hypothesis.

When  $\rho_{j, r, t}^{(\tilde{t}, b_i^{(\tilde{t})})} \geq -0.5\beta - 5\sqrt{\log(6n^2/\delta)/d} \cdot n\alpha$ , we have

$$\begin{aligned} \rho_{j, r, i}^{(\tilde{t}, \tilde{b})} &= \rho_{j, r, i}^{(t, b_i^{(\tilde{t})})} + \frac{\eta(P-1)^2}{Bm} \cdot \ell_i^{(t, b_i^{(\tilde{t})})} \cdot \sigma'(\langle \mathbf{w}_{j, r}^{(t, b_i^{(\tilde{t})})}, \boldsymbol{\xi}_i \rangle) \cdot \|\boldsymbol{\xi}_i\|_2^2 \\ &\geq -0.5\beta - 5\sqrt{\frac{\log(6n^2/\delta)}{d}} n\alpha - \frac{\eta(P-1)^2 \cdot 3\sigma_p^2 d}{2Bm} \\ &\geq -0.5\beta - 10\sqrt{\frac{\log(6n^2/\delta)}{d}} n\alpha \\ &\geq -\beta - 10\sqrt{\frac{\log(6n^2/\delta)}{d}} n\alpha, \end{aligned}$$

where the first inequality is by  $\ell_i^{(t, b_i^{(\tilde{t})})} \in (-1, 0)$  and  $\|\boldsymbol{\xi}_i\|_2^2 \leq (3/2)\sigma_p^2 d$  by Lemma A.1; the second inequality is due to  $5\sqrt{\log(6n^2/\delta)/d} \cdot n\alpha \geq 3\eta\sigma_p^2 d/(2Bm)$  by Condition 3.1.

Next we prove (25) holds for  $(\tilde{t}, \tilde{b})$ . We only need to consider the case of  $j = y_i$ . Consider

$$\begin{aligned} |\ell_i^{(\tilde{t}, \tilde{b})}| &= \frac{1}{1 + \exp\{y_i \cdot [F_{+1}(\mathbf{W}_{+1}^{(\tilde{t}, \tilde{b})}, \mathbf{x}_i) - F_{-1}(\mathbf{W}_{-1}^{(\tilde{t}, \tilde{b})}, \mathbf{x}_i)]\}} \\ &\leq \exp(-y_i \cdot [F_{+1}(\mathbf{W}_{+1}^{(\tilde{t}, \tilde{b})}, \mathbf{x}_i) - F_{-1}(\mathbf{W}_{-1}^{(\tilde{t}, \tilde{b})}, \mathbf{x}_i)]) \\ &\leq \exp(-F_{y_i}(\mathbf{W}_{y_i}^{(\tilde{t}, \tilde{b})}, \mathbf{x}_i) + 0.5), \end{aligned} \tag{38}$$

613 where the last inequality is by  $F_j(\mathbf{W}_j^{(\tilde{t}, \tilde{b})}, \mathbf{x}_i) \leq 0.5$  for  $j \neq y_i$  according to Lemma B.4. Now recall  
 614 the iterative update rule of  $\bar{\rho}_{j,r,i}^{(t,b)}$ :

$$\bar{\rho}_{j,r,i}^{(t,b+1)} = \bar{\rho}_{j,r,i}^{(t,b)} - \frac{\eta(P-1)^2}{Bm} \cdot \ell_i^{(t,b)} \cdot \sigma'(\langle \mathbf{w}_{j,r}^{(t,b)}, \boldsymbol{\xi}_i \rangle) \cdot \|\boldsymbol{\xi}_i\|_2^2 \cdot \mathbb{1}(i \in \mathcal{I}_{t,b}).$$

615 Let  $(t_{j,r,i}, b_{j,r,i})$  be the last time before  $(\tilde{t}, \tilde{b})$  that  $\bar{\rho}_{j,r,i}^{(t_{j,r,i}, b_{j,r,i})} \leq 0.5\alpha$ . Then by iterating the update  
 616 rule from  $(t_{j,r,i}, b_{j,r,i})$  to  $(\tilde{t}, \tilde{b})$ , we get

$$\begin{aligned} & \bar{\rho}_{j,r,i}^{(\tilde{t}, \tilde{b})} \\ &= \bar{\rho}_{j,r,i}^{(t_{j,r,i}, b_{j,r,i})} - \underbrace{\frac{\eta(P-1)^2}{Bm} \cdot \ell_i^{(t_{j,r,i}, b_{j,r,i})} \cdot \mathbb{1}(\langle \mathbf{w}_{j,r}^{(t_{j,r,i}, b_{j,r,i})}, \boldsymbol{\xi}_i \rangle \geq 0) \cdot \mathbb{1}(i \in \mathcal{I}_{t,b}) \|\boldsymbol{\xi}_i\|_2^2}_{\text{I}_7} \\ & \quad - \underbrace{\sum_{(t_{j,r,i}, b_{j,r,i}) < (t,b) < (\tilde{t}, \tilde{b})} \frac{\eta(P-1)^2}{Bm} \cdot \ell_i^{(t,b)} \cdot \mathbb{1}(\langle \mathbf{w}_{j,r}^{(t,b)}, \boldsymbol{\xi}_i \rangle \geq 0) \cdot \mathbb{1}(i \in \mathcal{I}_{t,b}) \|\boldsymbol{\xi}_i\|_2^2}_{\text{I}_8}. \end{aligned} \quad (39)$$

617 We first bound  $\text{I}_7$  as follows:

$$|\text{I}_7| \leq (\eta(P-1)^2/Bm) \cdot \|\boldsymbol{\xi}_i\|_2^2 \leq (\eta(P-1)^2/Bm) \cdot 3\sigma_p^2 d/2 \leq 1 \leq 0.25\alpha,$$

618 where the first inequality is by  $\ell_i^{(t_{j,r,i}, b_{j,r,i})} \in (-1, 0)$ ; the second inequality is by Lemma A.1; the  
 619 third inequality is by Condition 3.1; the last inequality is by our choice of  $\alpha = 4 \log(T^*)$  and  $T^* \geq e$ .

620 Second, we bound  $\text{I}_8$ . For  $(t_{j,r,i}, b_{j,r,i}) < (t,b) < (\tilde{t}, \tilde{b})$  and  $y_i = j$ , we can lower bound the inner  
 621 product  $\langle \mathbf{w}_{j,r}^{(t,b)}, \boldsymbol{\xi}_i \rangle$  as follows

$$\begin{aligned} \langle \mathbf{w}_{j,r}^{(t,b)}, \boldsymbol{\xi}_i \rangle &\geq \langle \mathbf{w}_{j,r}^{(0,0)}, \boldsymbol{\xi}_i \rangle + \frac{1}{P-1} \bar{\rho}_{j,r,i}^{(t,b)} - \frac{5}{P-1} \sqrt{\frac{\log(6n^2/\delta)}{d}} n\alpha \\ &\geq -\frac{0.5}{P-1} \beta + \frac{0.5}{P-1} \alpha - \frac{5}{P-1} \sqrt{\frac{\log(6n^2/\delta)}{d}} n\alpha \\ &\geq \frac{0.25}{P-1} \alpha, \end{aligned} \quad (40)$$

622 where the first inequality is by (29) in Lemma B.3; the second inequality is by  $\bar{\rho}_{j,r,i}^{(t,b)} > 0.5\alpha$   
 623 and  $\langle \mathbf{w}_{j,r}^{(0,0)}, \boldsymbol{\xi}_i \rangle \geq -0.5\beta/(P-1)$  due to the definition of  $t_{j,r,i}$  and  $\beta$ ; the last inequality is by  
 624  $\beta \leq 1/8 \leq 0.1\alpha$  and  $5\sqrt{\log(6n^2/\delta)/d} \cdot n\alpha \leq 0.2\alpha$  by Condition 3.1.

625 Thus, plugging the lower bounds of  $\langle \mathbf{w}_{j,r}^{(t,b)}, \boldsymbol{\xi}_i \rangle$  into  $\text{I}_8$  gives

$$\begin{aligned} |\text{I}_8| &\leq \sum_{(t_{j,r,i}, b_{j,r,i}) < (t,b) < (\tilde{t}, \tilde{b})} \frac{\eta(P-1)^2}{Bm} \cdot \exp\left(-\frac{1}{m} \sum_{r=1}^m (P-1) \sigma(\langle \mathbf{w}_{j,r}^{(t,b)}, \boldsymbol{\xi}_i \rangle) + 0.5\right) \\ & \quad \cdot \mathbb{1}(\langle \mathbf{w}_{j,r}^{(t,b)}, \boldsymbol{\xi}_i \rangle \geq 0) \cdot \|\boldsymbol{\xi}_i\|_2^2 \\ &\leq \frac{2\eta T^* n (P-1)^2}{Bm} \cdot \exp(-0.25\alpha) \exp(0.5) \cdot \frac{3\sigma_p^2 d}{2} \\ &\leq \frac{2\eta T^* n (P-1)^2}{Bm} \cdot \exp(-\log(T^*)) \exp(0.5) \cdot \frac{3\sigma_p^2 d}{2} \\ &= \frac{2\eta n (P-1)^2}{Bm} \cdot \frac{3\sigma_p^2 d}{2} \exp(0.5) \leq 1 \leq 0.25\alpha, \end{aligned}$$

626 where the first inequality is by (38); the second inequality is by (40); the third inequality is by  
 627  $\alpha = 4 \log(T^*)$ ; the fourth inequality is by Condition 3.1; the last inequality is by  $\log(T^*) \geq 1$  and  
 628  $\alpha = 4 \log(T^*)$ . Plugging the bound of  $\text{I}_7, \text{I}_8$  into (39) completes the proof for  $\bar{\rho}$ .

629 For the upper bound of (27), we prove a augmented hypothesis that there exists a  $i^* \in [n]$  with  
 630  $y_{i^*} = j$  such that for  $1 \leq t \leq T^*$  we have that  $\gamma_{j,r}^{(t,0)} / \bar{\rho}_{j,r,i^*} \leq C' \hat{\gamma}$ . Recall the iterative update rule  
 631 of  $\gamma_{j,r}^{(t,b)}$  and  $\bar{\rho}_{j,r,i}^{(t,b)}$ , we have

$$\begin{aligned}\bar{\rho}_{j,r,i}^{(t,b+1)} &= \bar{\rho}_{j,r,i}^{(t,b)} - \frac{\eta(P-1)^2}{Bm} \cdot \ell_i^{(t,b)} \cdot \sigma'(\langle \mathbf{w}_{j,r}^{(t,b)}, \boldsymbol{\xi}_i \rangle) \cdot \|\boldsymbol{\xi}_i\|_2^2 \cdot \mathbb{1}(y_i = j) \mathbb{1}(i \in \mathcal{I}_{t,b}) \\ \gamma_{j,r}^{(t,b+1)} &= \gamma_{j,r}^{(t,b)} - \frac{\eta}{Bm} \cdot \left[ \sum_{i \in \mathcal{I}_{t,b} \cap S_+} \ell_i^{(t,b)} \sigma'(\langle \mathbf{w}_{j,r}^{(t,b)}, y_i \cdot \boldsymbol{\mu} \rangle) \right. \\ &\quad \left. - \sum_{i \in \mathcal{I}_{t,b} \cap S_-} \ell_i^{(t,b)} \sigma'(\langle \mathbf{w}_{j,r}^{(t,b)}, y_i \cdot \boldsymbol{\mu} \rangle) \right] \cdot \|\boldsymbol{\mu}\|_2^2\end{aligned}$$

632 According to the fifth statement of Lemma B.8, for any  $i^* \in S_{j,r}^{(0,0)}$  it holds that  $j = y_{i^*}$  and  
 633  $\langle \mathbf{w}_{j,r}^{(t,b)}, \boldsymbol{\xi}_{i^*} \rangle \geq 0$  for any  $(t, b) \leq (\tilde{t}, \tilde{b})$ . Thus, we have

$$\bar{\rho}_{j,r,i^*}^{(\tilde{t},0)} = \bar{\rho}_{j,r,i^*}^{(\tilde{t}-1,0)} - \frac{\eta(P-1)^2}{Bm} \cdot \ell_{i^*}^{(\tilde{t}-1,b_{i^*}^{(\tilde{t}-1)})} \cdot \|\boldsymbol{\xi}_{i^*}\|_2^2 \geq \bar{\rho}_{j,r,i^*}^{(\tilde{t}-1,0)} - \frac{\eta(P-1)^2}{Bm} \cdot \ell_{i^*}^{(\tilde{t}-1,b_{i^*}^{(\tilde{t}-1)})} \cdot \sigma_p^2 d/2.$$

634 For the update rule of  $\gamma_{j,r}^{(t,b)}$ , according to Lemma B.8, we have

$$\begin{aligned}\sum_{b < H} \left| \sum_{i \in \mathcal{I}_{t,b} \cap S_+} \ell_i^{(t,b)} \sigma'(\langle \mathbf{w}_{j,r}^{(t,b)}, y_i \cdot \boldsymbol{\mu} \rangle) - \sum_{i \in \mathcal{I}_{t,b} \cap S_-} \ell_i^{(t,b)} \sigma'(\langle \mathbf{w}_{j,r}^{(t,b)}, y_i \cdot \boldsymbol{\mu} \rangle) \right| \\ \leq C_2 n \left| \ell_{i^*}^{(\tilde{T}-1,b_{i^*}^{(\tilde{T}-1)})} \right|.\end{aligned}$$

635 Then, we have

$$\begin{aligned}\frac{\gamma_{j,r}^{(\tilde{t},0)}}{\bar{\rho}_{j,r,i^*}^{(\tilde{t},0)}} &\leq \max \left\{ \frac{\gamma_{j,r}^{(\tilde{t}-1,0)}}{\bar{\rho}_{j,r,i^*}^{(\tilde{t}-1,0)}}, \frac{C_2 n \ell_{i^*}^{(\tilde{t}-1,b_{i^*}^{(\tilde{t}-1)})} \|\boldsymbol{\mu}\|_2^2}{(P-1)^2 \cdot \ell_{i^*}^{(\tilde{t}-1,b_{i^*}^{(\tilde{t}-1)})} \cdot \sigma_p^2 d/2} \right\} \\ &= \max \left\{ \frac{\gamma_{j,r}^{(\tilde{t}-1,0)}}{\bar{\rho}_{j,r,i^*}^{(\tilde{t}-1,0)}}, \frac{2C_2 n \|\boldsymbol{\mu}\|_2^2}{(P-1)^2 \sigma_p^2 d} \right\} \\ &\leq \frac{2C_2 n \|\boldsymbol{\mu}\|_2^2}{(P-1)^2 \sigma_p^2 d},\end{aligned} \tag{41}$$

636 where the last inequality is by  $\gamma_{j,r}^{(\tilde{t}-1,0)} / \bar{\rho}_{j,r,i^*}^{(\tilde{t}-1,0)} \leq 2C_2 \hat{\gamma} = 2C_2 n \|\boldsymbol{\mu}\|_2^2 / (P-1)^2 \sigma_p^2 d$ . Therefore,

$$\frac{\gamma_{j,r}^{(\tilde{t},0)}}{\bar{\rho}_{j,r,i^*}^{(\tilde{t},0)}} \leq 2C_2 \hat{\gamma}.$$

637 For iterations other than the starting of an epoch, we have the following upper bound:

$$\frac{\gamma_{j,r}^{(\tilde{t},b)}}{\bar{\rho}_{j,r,i^*}^{(\tilde{t},b)}} \leq \frac{2\gamma_{j,r}^{(\tilde{t},0)}}{\bar{\rho}_{j,r,i^*}^{(\tilde{t},0)}} \leq 4C_2 \hat{\gamma}$$

638 Thus, by taking  $C' = 4C_2$ , we have  $\gamma_{j,r}^{(\tilde{t},b)} / \bar{\rho}_{j,r,i^*}^{(\tilde{t},b)} \leq C' \hat{\gamma}$ .

639 On the other hand, when  $(t, b) < (\frac{\log(2T^*/\delta)}{2c_3^2}, 0)$ , we have

$$\gamma_{j,r}^{(t,b)} \geq -\frac{\log(2T^*/\delta)}{2c_3^2} \cdot \frac{\eta}{Bm} \cdot n \cdot \|\boldsymbol{\mu}\|_2^2 \geq -\frac{1}{12},$$

640 where the first inequality is due to update rule of  $\gamma_{j,r}^{t,b}$ , and the second inequality is due to Condition 3.1.

641 When  $(t, b) \geq (\frac{\log(2T^*/\delta)}{2c_3^2}, 0)$ , According to Lemma A.6, we have

$$\begin{aligned} \gamma_{j,r}^{(t,b)} &\geq \sum_{(t',b') < (t,b)} \frac{\eta}{Bm} [\min_{i,b'} \ell_i^{(t',b')} \min\{|\mathcal{I}_{t',b'} \cap S_+ \cap S_{-1}|, |\mathcal{I}_{t',b'} \cap S_+ \cap S_1|\} \\ &\quad - \max_{i,b'} \ell_i^{(t',b')} |\mathcal{I}_{t',b'} \cap S_-|] \cdot \|\mu\|_2^2 \\ &\geq \frac{\eta}{Bm} \left( \sum_{t'=0}^{t-1} (c_3 c_4 H \frac{B}{4} \min_{i,b'} \ell_i^{(t',b')} - nq \max_{i,b'} \ell_i^{(t',b')}) - nq \max_{i,b'} \ell_i^{(t,b')} \right) \|\mu\|_2^2 \\ &\geq 0, \end{aligned}$$

642 where the first inequality is due to the update rule of  $\gamma_{j,r}^{(t,b)}$ , the second inequality is due to Lemma A.6,  
643 and the third inequality is due to Condition 3.1.  $\square$

## 644 B.2 Decoupling with a Two-stage Analysis

### 645 B.2.1 First Stage

646 **Lemma B.9.** *There exist*

$$T_1 = C_3 \eta^{-1} Bm (P-1)^{-2} \sigma_p^{-2} d^{-1}, T_2 = C_4 \eta^{-1} Bm (P-1)^{-2} \sigma_p^{-2} d^{-1}$$

647 where  $C_3 = \Theta(1)$  is a large constant and  $C_4 = \Theta(1)$  is a small constant, such that

- 648 •  $\bar{\rho}_{j,r^*,i}^{(T_1,0)} \geq 2$  for any  $r^* \in S_i^{(0,0)} = \{r \in [m] : \langle \mathbf{w}_{y_i,r}^{(0)}, \xi_i \rangle > 0\}$ ,  $j \in \{\pm 1\}$  and  $i \in [n]$  with  $y_i = j$ .
- 649 •  $\max_{j,r} \gamma_{j,r}^{(t,b)} = O(\hat{\gamma})$  for all  $(t, b) \leq (T_1, 0)$ .
- 650 •  $\max_{j,r,i} |\rho_{j,r,i}^{(t,b)}| = \max\{\beta, O(n\sqrt{\log(n/\delta)} \log(T^*)/\sqrt{d})\}$  for all  $(t, b) \leq (T_1, 0)$ .
- 651 •  $\min_{j,r} \gamma_{j,r}^{(t,0)} = \Omega(\hat{\gamma})$  for all  $t \geq T_2$ .
- 652 •  $\max_{j,r} \bar{\rho}_{j,r,i}^{(T_1,0)} = O(1)$  for all  $i \in [n]$ .

653 *Proof of Lemma B.9.* By Proposition B.2, we have that  $\rho_{j,r,i}^{(t,b)} \geq -\beta - 10n\sqrt{\frac{\log(6n^2/\delta)}{d}}\alpha$  for all  
654  $j \in \{\pm 1\}$ ,  $r \in [m]$ ,  $i \in [n]$  and  $(0, 0) \leq (t, b) \leq (T^*, 0)$ . According to Lemma A.2, for  $\beta$  we have

$$\begin{aligned} \beta &= 2 \max_{i,j,r} \{|\langle \mathbf{w}_{j,r}^{(0,0)}, \mu \rangle|, (P-1)|\langle \mathbf{w}_{j,r}^{(0,0)}, \xi_i \rangle|\} \\ &\leq 2 \max\{\sqrt{2\log(12m/\delta)} \cdot \sigma_0 \|\mu\|_2, 2\sqrt{\log(12mn/\delta)} \cdot \sigma_0 (P-1) \sigma_p \sqrt{d}\} \\ &= O(\sqrt{\log(mn/\delta)} \cdot \sigma_0 (P-1) \sigma_p \sqrt{d}) \end{aligned}$$

655 where the last equality is by the first condition of Condition 3.1. Since  $\rho_{j,r,i}^{(t,b)} \leq 0$ , we have that

$$\begin{aligned} \max_{j,r,i} |\rho_{j,r,i}^{(t,b)}| &= \max_{j,r,i} -\rho_{j,r,i}^{(t,b)} \\ &\leq \beta + 10\sqrt{\frac{\log(6n^2/\delta)}{d}} n\alpha \\ &= \max\left\{\beta, O(\sqrt{\log(n/\delta)} \log(T^*) \cdot n/\sqrt{d})\right\}. \end{aligned}$$

656 Next, for the growth of  $\gamma_{j,r}^{(t)}$ , we have following upper bound

$$\begin{aligned} \gamma_{j,r}^{(t,b+1)} &= \gamma_{j,r}^{(t,b)} - \frac{\eta}{Bm} \cdot \sum_{i \in \mathcal{I}_{t,b}} \ell_i^{(t,b)} \sigma'(\langle \mathbf{w}_{j,r}^{(t,b)}, y_i \cdot \mu \rangle) \cdot \|\mu\|_2^2 \\ &\leq \gamma_{j,r}^{(t,b)} + \frac{\eta}{m} \cdot \|\mu\|_2^2, \end{aligned}$$

where the inequality is by  $|\ell'| \leq 1$ . Note that  $\gamma_{j,r}^{(0,0)} = 0$  and recursively use the inequality  $tB + b$  times we have

$$\gamma_{j,r}^{(t,b)} \leq \frac{\eta(tH + b)}{m} \cdot \|\boldsymbol{\mu}\|_2^2. \quad (42)$$

Since  $n \cdot \text{SNR}^2 = n\|\boldsymbol{\mu}\|_2^2 / ((P-1)^2 \sigma_p^2 d) = \hat{\gamma}$ , we have

$$T_1 = C_3 \eta^{-1} B m (P-1)^{-2} \sigma_p^{-2} d^{-1} = C_3 \eta^{-1} m \|\boldsymbol{\mu}\|_2^{-2} \hat{\gamma} B / n.$$

And it follows that

$$\gamma_{j,r}^{(t)} \leq \frac{\eta(tH + b)}{m} \cdot \|\boldsymbol{\mu}\|_2^2 \leq \frac{\eta n T_1}{m B} \cdot \|\boldsymbol{\mu}\|_2^2 \leq C_3 \hat{\gamma},$$

for all  $(0, 0) \leq (t, b) \leq (T_1, 0)$ .

For  $\bar{\rho}_{j,r,i}^{(t)}$ , recall from (18) that

$$\bar{\rho}_{y_i,r,i}^{(t+1,0)} = \bar{\rho}_{y_i,r,i}^{(t,0)} - \frac{\eta(P-1)^2}{Bm} \cdot \ell_i'^{(t,b_i^{(t)})} \cdot \sigma'(\langle \mathbf{w}_{y_i,r}^{(t,b_i^{(t)})}, \boldsymbol{\xi}_i \rangle) \cdot \|\boldsymbol{\xi}_i\|_2^2.$$

According to Lemma B.8, for any  $r^* \in S_i^{(0,0)} = \{r \in [m] : \langle \mathbf{w}_{y_i,r}^{(0)}, \boldsymbol{\xi}_i \rangle > \sigma_0 \sigma_p \sqrt{d}/\sqrt{2}\}$ , we have  $\langle \mathbf{w}_{y_i,r^*}^{(t,b)}, \boldsymbol{\xi}_i \rangle > 0$  for all  $(0, 0) \leq (t, b) \leq (T^*, 0)$  and hence

$$\bar{\rho}_{j,r^*,i}^{(t+1,0)} = \bar{\rho}_{j,r^*,i}^{(t,0)} - \frac{\eta(P-1)^2}{Bm} \cdot \ell_i'^{(t,b_i^{(t)})} \|\boldsymbol{\xi}_i\|_2^2$$

For each  $i$ , we denote by  $T_1^{(i)}$  the last time in the period  $[0, T_1]$  satisfying that  $\bar{\rho}_{y_i,r^*,i}^{(t,0)} \leq 2$ . Then for  $(0, 0) \leq (t, b) < (T_1^{(i)}, 0)$ ,  $\max_{j,r} \{|\bar{\rho}_{j,r,i}^{(t,b)}|, |\underline{\rho}_{j,r,i}^{(t,b)}|\} = O(1)$  and  $\max_{j,r} \gamma_{j,r}^{(t,b)} = O(1)$ . Therefore, we know that  $F_{-1}(\mathbf{W}^{(t,b)}, \mathbf{x}_i), F_{+1}(\mathbf{W}^{(t,b)}, \mathbf{x}_i) = O(1)$ . Thus there exists a positive constant  $C$  such that  $-\ell_i'^{(t,b)} \geq C \geq C_2$  for  $0 \leq t \leq T_1^{(i)}$ .

Then we have

$$\bar{\rho}_{y_i,r^*,i}^{(t,0)} \geq \frac{C \eta (P-1)^2 \sigma_p^2 dt}{2Bm}.$$

Therefore,  $\bar{\rho}_{y_i,r^*,i}^{(t,0)}$  will reach 2 within

$$T_1 = C_3 \eta^{-1} B m (P-1)^2 \sigma_p^{-2} d^{-1}$$

iterations for any  $r^* \in S_i^{(0,0)}$ , where  $C_3$  can be taken as  $4/C$ .

Next, we will discuss the lower bound of the growth of  $\gamma_{j,r}^{(t,b)}$ . For  $\bar{\rho}_{j,r,i}^{(t,b)}$ , we have

$$\begin{aligned} \bar{\rho}_{j,r,i}^{(t,b+1)} &= \bar{\rho}_{j,r,i}^{(t,b)} - \frac{\eta(P-1)^2}{Bm} \cdot \ell_i'^{(t,b)} \cdot \sigma'(\langle \mathbf{w}_{j,r}^{(t,b)}, \boldsymbol{\xi}_i \rangle) \cdot \|\boldsymbol{\xi}_i\|_2^2 \cdot \mathbf{1}(y_i = j) \mathbf{1}(i \in \mathcal{I}_{t,b}) \\ &\leq \bar{\rho}_{j,r,i}^{(t,b)} + \frac{3\eta(P-1)^2 \sigma_p^2 d}{2Bm} \end{aligned}$$

According to (42) and  $\bar{\rho}_{j,r,i}^{(0,0)} = 0$ , it follows that

$$\bar{\rho}_{j,r,i}^{(t,b)} \leq \frac{3\eta(P-1)^2 \sigma_p^2 d (tH + b)}{2Bm}, \gamma_{j,r}^{(t,b)} \leq \frac{\eta(tH + b)}{m} \cdot \|\boldsymbol{\mu}\|_2^2. \quad (43)$$

Therefore,  $\max_{j,r,i} \bar{\rho}_{j,r,i}^{(t,b)}$  will be smaller than 1 and  $\gamma_{j,r}^{(t,b)}$  smaller than  $\Theta(n\|\boldsymbol{\mu}\|_2^2 / (P-1)^2 \sigma_p^2 d) = \Theta(n \cdot \text{SNR}^2) = \Theta(\hat{\gamma}) = O(1)$  within

$$T_2 = C_4 \eta^{-1} B m (P-1)^{-2} \sigma_p^{-2} d^{-1}$$

iterations, where  $C_4$  can be taken as  $2/3$ . Therefore, we know that  $F_{-1}(\mathbf{W}^{(t,b)}, \mathbf{x}_i), F_{+1}(\mathbf{W}^{(t,b)}, \mathbf{x}_i) = O(1)$  in  $(0, 0) \leq (t, b) \leq (T_2, 0)$ . Thus, there exists a positive constant  $C$  such that  $-\ell_i'^{(t,b)} \geq C$  for  $0 \leq t \leq T_2$ .

679 Recall that we denote  $\{i \in [n] | y_i = y\}$  as  $S_y$ , and we have the update rule

$$\begin{aligned} \gamma_{j,r}^{(t,b+1)} &= \gamma_{j,r}^{(t,b)} - \frac{\eta}{Bm} \cdot \left[ \sum_{i \in \mathcal{I}_{t,b} \cap S_+} \ell_i^{(t,b)} \sigma'(\langle \mathbf{w}_{j,r}^{(t,b)}, \hat{y}_i \cdot \boldsymbol{\mu} \rangle) \right. \\ &\quad \left. - \sum_{i \in \mathcal{I}_{t,b} \cap S_-} \ell_i^{(t,b)} \sigma'(\langle \mathbf{w}_{j,r}^{(t,b)}, \hat{y}_i \cdot \boldsymbol{\mu} \rangle) \right] \cdot \|\boldsymbol{\mu}\|_2^2. \end{aligned}$$

680 For the growth of  $\gamma_{j,r}^{(t,b)}$ , if  $\langle \mathbf{w}_{j,r}^{(t,b)}, \boldsymbol{\mu} \rangle \geq 0$ , we have

$$\begin{aligned} \gamma_{j,r}^{(t,b+1)} &= \gamma_{j,r}^{(t,b)} - \frac{\eta}{Bm} \cdot \left[ \sum_{i \in \mathcal{I}_{t,b} \cap S_+ \cap S_1} \ell_i^{(t)} - \sum_{i \in \mathcal{I}_{t,b} \cap S_- \cap S_1} \ell_i^{(t)} \right] \|\boldsymbol{\mu}\|_2^2 \\ &\geq \gamma_{j,r}^{(t,b)} + \frac{\eta}{Bm} \cdot [C|\mathcal{I}_{t,b} \cap S_+ \cap S_1| - |\mathcal{I}_{t,b} \cap S_- \cap S_1|] \cdot \|\boldsymbol{\mu}\|_2^2. \end{aligned} \quad (44)$$

681 Similarly, if  $\langle \mathbf{w}_{j,r}^{(t,b)}, \boldsymbol{\mu} \rangle < 0$ ,

$$\gamma_{j,r}^{(t,b+1)} \geq \gamma_{j,r}^{(t,b)} + \frac{\eta}{Bm} \cdot [C|\mathcal{I}_{t,b} \cap S_+ \cap S_{-1}| - |\mathcal{I}_{t,b} \cap S_- \cap S_{-1}|] \cdot \|\boldsymbol{\mu}\|_2^2. \quad (45)$$

682 Therefore, for  $t \in [T_2, T_1]$ , we have

$$\begin{aligned} \gamma_{j,r}^{(t,0)} &\geq \sum_{(t',b') < (t,0)} \frac{\eta}{Bm} [C \min\{|\mathcal{I}_{t',b'} \cap S_+ \cap S_{-1}|, |\mathcal{I}_{t',b'} \cap S_+ \cap S_1|\} - |\mathcal{I}_{t,b} \cap S_-|] \cdot \|\boldsymbol{\mu}\|_2^2 \\ &\geq \frac{\eta}{Bm} (c_3 t c_4 H C \frac{B}{4} - T_1 n q) \|\boldsymbol{\mu}\|_2^2 \\ &= \frac{\eta}{Bm} (c_3 c_4 t C \frac{n}{4} - T_1 n q) \|\boldsymbol{\mu}\|_2^2 \\ &\geq \frac{\eta c_3 c_4 C t n \|\boldsymbol{\mu}\|_2^2}{8 B m} \\ &\geq \frac{c_3 c_4 C C_4 n \|\boldsymbol{\mu}\|_2^2}{(P-1)^2 \sigma_p^2 d} = \Theta(n \cdot \text{SNR}^2) = \Theta(\hat{\gamma}), \end{aligned} \quad (46)$$

683 where the second inequality is due to Lemma A.6, the third inequality is due to  $q < \frac{C_4 C c_3 c_4}{8 C_3}$  in  
684 Condition 3.1.

685 And it follows directly from (43) that

$$\bar{\rho}_{j,r,i}^{(T_1,0)} \leq \frac{3\eta(P-1)^2 \sigma_p^2 d T_1 H}{2 B m} = \frac{3 C_3}{2}, \bar{\rho}_{j,r,i}^{(T_1,0)} = O(1),$$

686 which completes the proof.  $\square$

## 687 B.2.2 Second Stage

688 By the signal-noise decomposition, at the end of the first stage, we have

$$\mathbf{w}_{j,r}^{(t,b)} = \mathbf{w}_{j,r}^{(0,0)} + j \gamma_{j,r}^{(t,b)} \|\boldsymbol{\mu}\|_2^{-2} \boldsymbol{\mu} + \frac{1}{P-1} \sum_{i=1}^n \bar{\rho}_{j,r,i}^{(t,b)} \|\boldsymbol{\xi}_i\|_2^{-2} \boldsymbol{\xi}_i + \frac{1}{P-1} \sum_{i=1}^n \rho_{j,r,i}^{(t,b)} \|\boldsymbol{\xi}_i\|_2^{-2} \boldsymbol{\xi}_i.$$

689 for  $j \in [\pm 1]$  and  $r \in [m]$ . By the results we get in the first stage, we know that at the beginning of  
690 this stage, we have the following property holds:

- 691 •  $\bar{\rho}_{j,r^*,i}^{(T_1,0)} \geq 2$  for any  $r^* \in S_i^{(0,0)} = \{r \in [m] : \langle \mathbf{w}_{y_i, r}^{(0,0)}, \boldsymbol{\xi}_i \rangle > \sigma_0 \sigma_p \sqrt{d}/\sqrt{2}\}$ ,  $j \in \{\pm 1\}$  and  $i \in [n]$   
692 with  $y_i = j$ .
- 693 •  $\max_{j,r,i} |\rho_{j,r,i}^{(T_1,0)}| = \max\{\beta, O(n \sqrt{\log(n/\delta)} \log(T^*)/\sqrt{d})\}$ .
- 694 •  $\gamma_{j,r}^{(T_1,0)} = \Theta(\hat{\gamma})$  for any  $j \in \{\pm 1\}$ ,  $r \in [m]$ .

695 where  $\hat{\gamma} = n \cdot \text{SNR}^2$ . Now we choose  $\mathbf{W}^*$  as follows

$$\mathbf{w}_{j,r}^* = \mathbf{w}_{j,r}^{(0,0)} + \frac{20 \log(2/\epsilon)}{P-1} \left[ \sum_{i=1}^n \mathbf{1}(j = y_i) \cdot \frac{\boldsymbol{\xi}_i}{\|\boldsymbol{\xi}_i\|_2^2} \right].$$

696 **Lemma B.10.** *Under the same conditions as Theorem 3.2, we have that  $\|\mathbf{W}^{(T_1,0)} - \mathbf{W}^*\|_F \leq$*   
 697  $\tilde{O}(m^{1/2}n^{1/2}(P-1)^{-1}\sigma_p^{-1}d^{-1/2}(1 + \max\{\beta, n\sqrt{\log(n/\delta)}\log(T^*)/\sqrt{d}\}))$ .

*Proof.*

$$\begin{aligned} & \|\mathbf{W}^{(T_1,0)} - \mathbf{W}^*\|_F \\ & \leq \|\mathbf{W}^{(T_1,0)} - \mathbf{W}^{(0,0)}\|_F + \|\mathbf{W}^* - \mathbf{W}^{(0,0)}\|_F \\ & \leq O(\sqrt{m}) \max_{j,r} \gamma_{j,r}^{(T_1,0)} \|\boldsymbol{\mu}\|_2^{-1} + \frac{1}{P-1} O(\sqrt{m}) \max_{j,r} \left\| \sum_{i=1}^n \bar{\rho}_{j,r,i}^{(T_1,0)} \cdot \frac{\boldsymbol{\xi}_i}{\|\boldsymbol{\xi}_i\|_2^2} + \sum_{i=1}^n \rho_{j,r,i}^{(T_1,0)} \cdot \frac{\boldsymbol{\xi}_i}{\|\boldsymbol{\xi}_i\|_2^2} \right\|_2 \\ & \quad + O(m^{1/2}n^{1/2} \log(1/\epsilon)(P-1)^{-1}\sigma_p^{-1}d^{-1/2}) \\ & = O(m^{1/2}\hat{\gamma}\|\boldsymbol{\mu}\|_2^{-1}) + \tilde{O}(m^{1/2}n^{1/2}(P-1)^{-1}\sigma_p^{-1}d^{-1/2}(1 + \max\{\beta, n\sqrt{\log(n/\delta)}\log(T^*)/\sqrt{d}\})) \\ & \quad + O(m^{1/2}n^{1/2} \log(1/\epsilon)(P-1)^{-1}\sigma_p^{-1}d^{-1/2}) \\ & = O(m^{1/2}n \cdot \text{SNR} \cdot (P-1)^{-1}\sigma_p^{-1}d^{-1/2}(1 + \max\{\beta, n\sqrt{\log(n/\delta)}\log(T^*)/\sqrt{d}\})) \\ & \quad + \tilde{O}(m^{1/2}n^{1/2} \log(1/\epsilon)(P-1)^{-1}\sigma_p^{-1}d^{-1/2}) \\ & = \tilde{O}(m^{1/2}n^{1/2}(P-1)^{-1}\sigma_p^{-1}d^{-1/2}(1 + \max\{\beta, n\sqrt{\log(n/\delta)}\log(T^*)/\sqrt{d}\})), \end{aligned}$$

698 where the first inequality is by triangle inequality, the second inequality and the first equality are by  
 699 our decomposition of  $\mathbf{W}^{(T_1,0)}$ ,  $\mathbf{W}^*$  and Lemma A.1; the second equality is by  $n \cdot \text{SNR}^2 = \Theta(\hat{\gamma})$   
 700 and  $\text{SNR} = \|\boldsymbol{\mu}\|/(P-1)\sigma_p d^{1/2}$ ; the third equality is by  $n^{1/2} \cdot \text{SNR} = O(1)$ .  $\square$

701 **Lemma B.11.** *Under the same conditions as Theorem 3.2, we have that*

$$y_i \langle \nabla f(\mathbf{W}^{(t,b)}, \mathbf{x}_i), \mathbf{W}^* \rangle \geq \log(2/\epsilon)$$

702 for all  $(T_1, 0) \leq (t, b) \leq (T^*, 0)$ .

703 *Proof of Lemma B.11.* Recall that  $f(\mathbf{W}^{(t,b)}) = (1/m) \sum_{j,r} j \cdot [\sigma(\langle \mathbf{w}_{j,r}^{(t,b)}, \hat{y}_i \boldsymbol{\mu} \rangle) + (P -$   
 704  $1)\sigma(\langle \mathbf{w}_{j,r}^{(t,b)}, \boldsymbol{\xi}_i \rangle)]$ , thus we have

$$\begin{aligned} & y_i \langle \nabla f(\mathbf{W}^{(t,b)}, \mathbf{x}_i), \mathbf{W}^* \rangle \\ & = \frac{1}{m} \sum_{j,r} \sigma'(\langle \mathbf{w}_{j,r}^{(t,b)}, \hat{y}_i \boldsymbol{\mu} \rangle) \langle y_i \hat{y}_i \boldsymbol{\mu}, j \mathbf{w}_{j,r}^* \rangle + \frac{P-1}{m} \sum_{j,r} \sigma'(\langle \mathbf{w}_{j,r}^{(t,b)}, \boldsymbol{\xi}_i \rangle) \langle y_i \boldsymbol{\xi}_i, j \mathbf{w}_{j,r}^* \rangle \\ & = \frac{1}{m} \sum_{j,r} \sum_{i'=1}^n \sigma'(\langle \mathbf{w}_{j,r}^{(t,b)}, \boldsymbol{\xi}_{i'} \rangle) 20 \log(2/\epsilon) \mathbf{1}(j = y_{i'}) \cdot \frac{\langle \boldsymbol{\xi}_{i'}, \boldsymbol{\xi}_i \rangle}{\|\boldsymbol{\xi}_{i'}\|_2^2} \\ & \quad + \frac{1}{m} \sum_{j,r} \sum_{i'=1}^n \sigma'(\langle \mathbf{w}_{j,r}^{(t,b)}, \hat{y}_i \boldsymbol{\mu} \rangle) 20 \log(2/\epsilon) \mathbf{1}(j = y_{i'}) \cdot \frac{\langle \hat{y}_i \boldsymbol{\mu}, \boldsymbol{\xi}_{i'} \rangle}{\|\boldsymbol{\xi}_{i'}\|_2^2} \\ & \quad + \frac{1}{m} \sum_{j,r} \sigma'(\langle \mathbf{w}_{j,r}^{(t,b)}, \hat{y}_i \boldsymbol{\mu} \rangle) \langle y_i \hat{y}_i \boldsymbol{\mu}, j \mathbf{w}_{j,r}^{(0,0)} \rangle + \frac{P-1}{m} \sum_{j,r} \sigma'(\langle \mathbf{w}_{j,r}^{(t,b)}, \boldsymbol{\xi}_i \rangle) \langle y_i \boldsymbol{\xi}_i, j \mathbf{w}_{j,r}^{(0,0)} \rangle \\ & \geq \frac{1}{m} \sum_{j=y_i, r} \sigma'(\langle \mathbf{w}_{j,r}^{(t,b)}, \boldsymbol{\xi}_i \rangle) 20 \log(2/\epsilon) - \frac{1}{m} \sum_{j,r} \sum_{i' \neq i} \sigma'(\langle \mathbf{w}_{j,r}^{(t,b)}, \boldsymbol{\xi}_{i'} \rangle) 20 \log(2/\epsilon) \cdot \frac{|\langle \boldsymbol{\xi}_{i'}, \boldsymbol{\xi}_i \rangle|}{\|\boldsymbol{\xi}_{i'}\|_2^2} \\ & \quad - \frac{1}{m} \sum_{j,r} \sum_{i'=1}^n \sigma'(\langle \mathbf{w}_{j,r}^{(t,b)}, \hat{y}_i \boldsymbol{\mu} \rangle) 20 \log(2/\epsilon) \cdot \frac{|\langle \hat{y}_i \boldsymbol{\mu}, \boldsymbol{\xi}_{i'} \rangle|}{\|\boldsymbol{\xi}_{i'}\|_2^2} - \frac{1}{m} \sum_{j,r} \sigma'(\langle \mathbf{w}_{j,r}^{(t,b)}, \hat{y}_i \boldsymbol{\mu} \rangle) \beta \end{aligned}$$



$$\begin{aligned}
&\geq \underbrace{\frac{1}{m} \sum_{j=y_i, r} \sigma'(\langle \mathbf{w}_{j,r}^{(t,b)}, \boldsymbol{\xi}_i \rangle) 20 \log(2/\epsilon)}_{I_9} - \underbrace{\frac{1}{m} \sum_{j,r} \sigma'(\langle \mathbf{w}_{j,r}^{(t,b)}, \boldsymbol{\xi}_i \rangle) 20 \log(2/\epsilon) O(n\sqrt{\log(n/\delta)}/\sqrt{d})}_{I_{10}} \\
&\quad - \underbrace{\frac{1}{m} \sum_{j,r} \sigma'(\langle \mathbf{w}_{j,r}^{(t,b)}, \hat{y}_i \boldsymbol{\mu} \rangle) O(n\sqrt{\log(n/\delta)} \cdot \text{SNR} \cdot d^{-1/2})}_{I_{11}} - \underbrace{\frac{1}{m} \sum_{j,r} \sigma'(\langle \mathbf{w}_{j,r}^{(t,b)}, y_i \boldsymbol{\mu} \rangle) \beta}_{I_{12}},
\end{aligned} \tag{47}$$

where the first inequality is by Lemma A.2 and the last inequality is by Lemma A.1. Then, we will bound each term in (47) respectively.

For  $I_{10}, I_{11}, I_{12}, I_{14}$ , we have that

$$\begin{aligned}
|I_{10}| &\leq O(n\sqrt{\log(n/\delta)}/\sqrt{d}), \quad |I_{11}| \leq O(n\sqrt{\log(n/\delta)} \cdot \text{SNR} \cdot d^{-1/2}), \\
|I_{12}| &\leq O(\beta),
\end{aligned} \tag{48}$$

For  $j = y_i$  and  $r \in S_i^{(0)}$ , according to Lemma B.3, we have

$$\begin{aligned}
(P-1)\langle \mathbf{w}_{j,r}^{(t,b)}, \boldsymbol{\xi}_i \rangle &\geq (P-1)\langle \mathbf{w}_{j,r}^{(0,0)}, \boldsymbol{\xi}_i \rangle + \bar{\rho}_{j,r,i}^{(t,b)} - 5n\sqrt{\frac{\log(4n^2/\delta)}{d}}\alpha \\
&\geq 2 - \beta - 5n\sqrt{\frac{\log(4n^2/\delta)}{d}}\alpha \\
&\geq 1.5 - \beta > 0
\end{aligned}$$

where the first inequality is by Lemma B.3; the second inequality is by  $5n\sqrt{\frac{\log(4n^2/\delta)}{d}} \leq 0.5$ ; and the last inequality is by  $\beta < 1.5$ . Therefore, for  $I_9$ , according to the fourth statement of Proposition B.8, we have

$$I_9 \geq \frac{1}{m} |\tilde{S}_i^{(t,b)}| 20 \log(2/\epsilon) \geq 2 \log(2/\epsilon). \tag{49}$$

By plugging (48) and (49) into (47) and according to triangle inequality we have

$$y_i \langle \nabla f(\mathbf{W}^{(t,b)}, \mathbf{x}_i), \mathbf{W}^* \rangle \geq I_9 - |I_{10}| - |I_{11}| - |I_{12}| - |I_{14}| \geq \log(2/\epsilon),$$

which completes the proof.  $\square$

**Lemma B.12.** Under Assumption 3.1, for  $(0, 0) \leq (t, b) \leq (T^*, 0)$ , the following result holds.

$$\|\nabla L_{\mathcal{I}_{t,b}}(\mathbf{W}^{(t,b)})\|_F^2 \leq O(\max\{\|\boldsymbol{\mu}\|_2^2, (P-1)^2 \sigma_p^2 d\}) L_{\mathcal{I}_{t,b}}(\mathbf{W}^{(t,b)}).$$

*Proof.* We first prove that

$$\|\nabla f(\mathbf{W}^{(t,b)}, \mathbf{x}_i)\|_F = O(\max\{\|\boldsymbol{\mu}\|_2, (P-1)\sigma_p\sqrt{d}\}). \tag{50}$$

Without loss of generality, we suppose that  $\hat{y}_i = 1$ . Then we have that

$$\begin{aligned}
\|\nabla f(\mathbf{W}^{(t,b)}, \mathbf{x}_i)\|_F &\leq \frac{1}{m} \sum_{j,r} \left\| \left[ \sigma'(\langle \mathbf{w}_{j,r}^{(t,b)}, \boldsymbol{\mu} \rangle) \boldsymbol{\mu} + (P-1) \sigma'(\langle \mathbf{w}_{j,r}^{(t,b)}, \boldsymbol{\xi}_i \rangle) \boldsymbol{\xi}_i \right] \right\|_2 \\
&\leq \frac{1}{m} \sum_{j,r} \sigma'(\langle \mathbf{w}_{j,r}^{(t,b)}, \boldsymbol{\mu} \rangle) \|\boldsymbol{\mu}\|_2 + \frac{P-1}{m} \sum_{j,r} \sigma'(\langle \mathbf{w}_{j,r}^{(t,b)}, \boldsymbol{\xi}_i \rangle) \|\boldsymbol{\xi}_i\|_2 \\
&\leq 4 \max\{\|\boldsymbol{\mu}\|_2, 2(P-1)\sigma_p\sqrt{d}\},
\end{aligned}$$

where the first and second inequalities are by triangle inequality, the third inequality is by Lemma A.1.

Then we upper bound the gradient norm  $\|\nabla L_S(\mathbf{W}^{(t,b)})\|_F$  as:

$$\|\nabla L_{\mathcal{I}_{t,b}}(\mathbf{W}^{(t,b)})\|_F^2 \leq \left[ \frac{1}{B} \sum_{i \in \mathcal{I}_{t,b}} \ell'(y_i f(\mathbf{W}^{(t,b)}, \mathbf{x}_i)) \|\nabla f(\mathbf{W}^{(t,b)}, \mathbf{x}_i)\|_F \right]^2$$

$$\begin{aligned}
&\leq \left[ \frac{1}{B} \sum_{i \in \mathcal{I}_{t,b}} O(\max\{\|\boldsymbol{\mu}\|_2, (P-1)\sigma_p\sqrt{d}\}) (-\ell'(y_i f(\mathbf{W}^{(t,b)}, \mathbf{x}_i))) \right]^2 \\
&\leq O(\max\{\|\boldsymbol{\mu}\|_2^2, (P-1)^2\sigma_p^2 d\}) \cdot \frac{1}{B} \sum_{i \in \mathcal{I}_{t,b}} -\ell'(y_i f(\mathbf{W}^{(t,b)}, \mathbf{x}_i)) \\
&\leq O(\max\{\|\boldsymbol{\mu}\|_2^2, (P-1)\sigma_p^2 d\}) L_{\mathcal{I}_{t,b}}(\mathbf{W}^{(t,b)}),
\end{aligned}$$

719 where the first inequality is by triangle inequality, the second inequality is by (50), the third inequality  
720 is by Cauchy-Schwartz inequality and the last inequality is due to the property of the cross entropy  
721 loss  $-\ell' \leq \ell$ .  $\square$

722 **Lemma B.13.** *Under the same conditions as Theorem 3.2, we have that*

$$\|\mathbf{W}^{(t,b)} - \mathbf{W}^*\|_F^2 - \|\mathbf{W}^{(t+1,b)} - \mathbf{W}^*\|_F^2 \geq \eta L_{\mathcal{I}_{t,b}}(\mathbf{W}^{(t,b)}) - \eta\epsilon$$

723 for all  $(T_1, 0) \leq (t, b) \leq (T^*, 0)$ .

724 *Proof of Lemma B.13.* We have

$$\begin{aligned}
&\|\mathbf{W}^{(t,b)} - \mathbf{W}^*\|_F^2 - \|\mathbf{W}^{(t+1,b)} - \mathbf{W}^*\|_F^2 \\
&= 2\eta \langle \nabla L_{\mathcal{I}_{t,b}}(\mathbf{W}^{(t,b)}), \mathbf{W}^{(t,b)} - \mathbf{W}^* \rangle - \eta^2 \|\nabla L_S(\mathbf{W}^{(t,b)})\|_F^2 \\
&= \frac{2\eta}{B} \sum_{i \in \mathcal{I}_{t,b}} \ell'_i(t,b) [y_i f(\mathbf{W}^{(t,b)}, \mathbf{x}_i) - \langle \nabla f(\mathbf{W}^{(t,b)}, \mathbf{x}_i), \mathbf{W}^* \rangle] - \eta^2 \|\nabla L_{\mathcal{I}_{t,b}}(\mathbf{W}^{(t,b)})\|_F^2 \\
&\geq \frac{2\eta}{B} \sum_{i \in \mathcal{I}_{t,b}} \ell'_i(t,b) [y_i f(\mathbf{W}^{(t,b)}, \mathbf{x}_i) - \log(2/\epsilon)] - \eta^2 \|\nabla L_S(\mathbf{W}^{(t,b)})\|_F^2 \\
&\geq \frac{2\eta}{B} \sum_{i \in \mathcal{I}_{t,b}} [\ell(y_i f(\mathbf{W}^{(t,b)}, \mathbf{x}_i)) - \epsilon/2] - \eta^2 \|\nabla L_{\mathcal{I}_{t,b}}(\mathbf{W}^{(t,b)})\|_F^2 \\
&\geq \eta L_{\mathcal{I}_{t,b}}(\mathbf{W}^{(t,b)}) - \eta\epsilon,
\end{aligned}$$

725 where the first inequality is by Lemma B.11; the second inequality is due to the convexity of the  
726 cross-entropy function; the last inequality is due to Lemma B.12.  $\square$

**Lemma B.14.**

$$\left| L_{\mathcal{I}^{(t,b)}}(\mathbf{W}^{(t,b)}) - L_{\mathcal{I}^{(t,b)}}(\mathbf{W}^{(t,0)}) \right| \leq \epsilon$$

*Proof.*

$$\begin{aligned}
&\left| L_{\mathcal{I}^{(t,b)}}(\mathbf{W}^{(t,b)}) - L_{\mathcal{I}^{(t,b)}}(\mathbf{W}^{(t,0)}) \right| \\
&\leq \frac{1}{B} \sum_{i \in \mathcal{I}_{t,b}} \left| \ell(y_i f(\mathbf{W}^{(t,b)}, \mathbf{x}_i)) - \ell(y_i f(\mathbf{W}^{(t,0)}, \mathbf{x}_i)) \right| \\
&\leq \frac{1}{B} \sum_{i \in \mathcal{I}_{t,b}} \left| y_i f(\mathbf{W}^{(t,b)}, \mathbf{x}_i) - y_i f(\mathbf{W}^{(t,0)}, \mathbf{x}_i) \right| \\
&\leq \frac{1}{B} \sum_{i \in \mathcal{I}_{t,b}} \frac{1}{m} \sum_{j,r} \left( \left| \langle \mathbf{w}_{j,r}^{(t,b)} - \mathbf{w}_{j,r}^{(t,0)}, \boldsymbol{\mu} \rangle \right| + (P-1) \left| \langle \mathbf{w}_{j,r}^{(t,b)} - \mathbf{w}_{j,r}^{(t,0)}, \boldsymbol{\xi}_i \rangle \right| \right) \\
&\leq \frac{H\eta(P-1)}{Bm} \|\boldsymbol{\mu}\|_2 \sigma_p \sqrt{2 \log(6n/\delta)} + \frac{H\eta(P-1)^2}{Bm} 2\sigma_p^2 \sqrt{d \log(6n^2/\delta)} \\
&\leq \epsilon,
\end{aligned}$$

727 where the first inequality is due to triangle inequality, the second inequality is due to  $|\ell'_i| \leq 1$ , the third  
728 inequality is due to triangle inequality and the definition of neural networks, the forth inequality is due  
729 to parameter update rule (15) and Lemma A.1, and the fifth inequality is due to Condition 3.1.  $\square$

730 **Lemma B.15.** *Under the same conditions as Theorem 3.2, for all  $T_1 \leq t \leq T^*$ , we have*  
 731  $\max_{j,r,i} |\rho_{j,r,i}^{(t,b)}| = \max \{O(\sqrt{\log(mn/\delta)} \cdot \sigma_0 \sigma_p \sqrt{d}), O(n\sqrt{\log(n/\delta)} \log(T^*)/\sqrt{d})\}$ . Besides,

$$\frac{1}{(s - T_1)H} \sum_{(T_1,0) \leq (t,b) < (s,0)} L_{\mathcal{I}_{t,b}}(\mathbf{W}^{(t,b)}) \leq \frac{\|\mathbf{W}^{(T_1,0)} - \mathbf{W}^*\|_F^2}{\eta(s - T_1)H} + \epsilon$$

732 for all  $T_1 \leq t \leq T^*$ . Therefore, we can find an iterate with training loss smaller than  $2\epsilon$  within  
 733  $T = T_1 + \left\lceil \|\mathbf{W}^{(T_1)} - \mathbf{W}^*\|_F^2 / (\eta\epsilon) \right\rceil = T_1 + \tilde{O}(\eta^{-1}\epsilon^{-1}mnd^{-1}\sigma_p^{-2})$  iterations.

734 *Proof of Lemma B.15.* Note that  $\max_{j,r,i} |\rho_{j,r,i}^{(t,b)}| = \max \{O(\sqrt{\log(mn/\delta)} \cdot \sigma_0(P -$   
 735  $1)\sigma_p\sqrt{d}), O(n\sqrt{\log(n/\delta)} \log(T^*)/\sqrt{d})\}$  can be proved in the same way as Lemma B.9.

736 For any  $T_1 \leq s \leq T^*$ , by taking a summation of the inequality in Lemma B.13 and dividing  
 737  $(s - T_1)H$  on both sides, we obtain that

$$\frac{1}{(s - T_1)H} \sum_{(T_1,0) \leq (t,b) < (s,0)} L_{\mathcal{I}_{t,b}}(\mathbf{W}^{(t,b)}) \leq \frac{\|\mathbf{W}^{(T_1,0)} - \mathbf{W}^*\|_F^2}{\eta(s - T_1)H} + \epsilon.$$

738 According to the definition of  $T$ , we have

$$\frac{1}{(T - T_1)H} \sum_{(T_1,0) \leq (t,b) < (T,0)} L_{\mathcal{I}_{t,b}}(\mathbf{W}^{(t,b)}) \leq 2\epsilon.$$

739 Then there exists an epoch  $T_1 \leq t \leq T^*$  such that

$$\frac{1}{H} \sum_{b=0}^{H-1} L_{\mathcal{I}_{t,b}}(\mathbf{W}^{(t,b)}) \leq 2\epsilon.$$

740 Thus, according to Lemma B.14, we have

$$L_S(\mathbf{W}^{(t,0)}) \leq 3\epsilon$$

741

□

742 **Lemma B.16.** *Under the same conditions as Theorem 3.2, we have*

$$\sum_{i=1}^n \bar{\rho}_{j,r,i}^{(t,b)} / \gamma_{j',r'}^{(t,b)} = \Theta(\text{SNR}^{-2}) \quad (51)$$

743 for all  $j, j' \in \{\pm 1\}$ ,  $r, r' \in [m]$  and  $(T_2, 0) \leq (t, b) \leq (T^*, 0)$ .

744 *Proof.* Now suppose that there exists  $(0, 0) < (\tilde{T}, 0) \leq (T^*, 0)$  such that  $\sum_{i=1}^n \bar{\rho}_{j,r,i}^{(t,0)} / \gamma_{j',r'}^{(t,b)} =$   
 745  $\Theta(\text{SNR}^{-2})$  for all  $(0, 0) < (t, 0) < (\tilde{T}, 0)$ . Then for  $\bar{\rho}_{j,r,i}^{(t,b)}$ , according to Lemma B.1, we have

$$\begin{aligned} \gamma_{j,r}^{(t+1,0)} &= \gamma_{j,r}^{(t,b)} - \frac{\eta}{Bm} \cdot \sum_{b < H} \left[ \sum_{i \in S_+ \cap \mathcal{I}_{t,b}} \ell'_i{}^{(t,b_i^{(t)})} \sigma'(\langle \mathbf{w}_{j,r}^{(t,b_i^{(t)})}, \hat{\mathbf{y}}_i \cdot \boldsymbol{\mu} \rangle) \right. \\ &\quad \left. - \sum_{i \in S_- \cap \mathcal{I}_{t,b}} \ell'_i{}^{(t,b_i^{(t)})} \sigma'(\langle \mathbf{w}_{j,r}^{(t,b_i^{(t)})}, \hat{\mathbf{y}}_i \cdot \boldsymbol{\mu} \rangle) \right] \cdot \|\boldsymbol{\mu}\|_2^2, \\ \bar{\rho}_{j,r,i}^{(t+1,0)} &= \bar{\rho}_{j,r,i}^{(t,0)} - \frac{\eta(P-1)^2}{Bm} \cdot \ell'_i{}^{(t,b_i^{(t)})} \cdot \sigma'(\langle \mathbf{w}_{j,r}^{(t,b_i^{(t)})}, \boldsymbol{\xi}_i \rangle) \cdot \|\boldsymbol{\xi}_i\|_2^2 \cdot \mathbf{1}(y_i = j), \end{aligned}$$

746 It follows that

$$\begin{aligned}
& \sum_{i=1}^n \bar{\rho}_{j,r,i}^{(\tilde{T},0)} \\
&= \sum_{i:y_i=j} \bar{\rho}_{j,r,i}^{(\tilde{T},0)} \\
&= \sum_{i:y_i=j} \bar{\rho}_{j,r,i}^{(\tilde{T}-1,0)} - \frac{\eta(P-1)^2}{Bm} \cdot \sum_{i:y_i=j} \ell'_i(\tilde{T}-1, b_i^{(\tilde{T}-1)}) \cdot \sigma'(\langle \mathbf{w}_{j,r}^{(\tilde{T}-1, b_i^{(\tilde{T}-1)})}, \boldsymbol{\xi}_i \rangle) \|\boldsymbol{\xi}_i\|_2^2 \\
&= \sum_{i=1}^n \bar{\rho}_{j,r,i}^{(\tilde{T}-1,0)} - \frac{\eta(P-1)^2}{Bm} \cdot \sum_{i \in \tilde{S}_{j,r}^{(\tilde{T}-1, \tilde{b}_i^{(\tilde{T}-1)})}} \ell'_i(\tilde{T}-1, b_i^{(\tilde{T}-1)}) \|\boldsymbol{\xi}_i\|_2^2 \\
&\geq \sum_{i=1}^n \bar{\rho}_{j,r,i}^{(\tilde{T}-1)} + \frac{\eta(P-1)^2 \sigma_p^2 d H\Phi(-1)}{8m} \cdot \min_{i \in \tilde{S}_{j,r}^{(\tilde{T}, \tilde{b}-1)} \cap \mathcal{I}_{\tilde{T}, \tilde{b}-1}} |\ell'_i(\tilde{T}-1, b_i^{(\tilde{T}-1)})|,
\end{aligned} \tag{52}$$

747 where the last equality is by the definition of  $S_{j,r}^{(\tilde{T}-1)}$  as  $\{i \in [n] : y_i = j, \langle \mathbf{w}_{j,r}^{(\tilde{T}-1)}, \boldsymbol{\xi}_i \rangle > 0\}$ ; the last  
748 inequality is by Lemma A.1 and the fifth statement of Lemma B.8.

749 And

$$\begin{aligned}
\gamma_{j',r'}^{(\tilde{T},0)} &\leq \gamma_{j',r'}^{(\tilde{T}-1,0)} - \frac{\eta}{Bm} \cdot \sum_{i \in S_+} \ell'_i(\tilde{T}-1, b_i^{(\tilde{T}-1)}) \sigma'(\langle \mathbf{w}_{j',r'}^{(\tilde{T}-1, b_i^{(\tilde{T}-1)})}, \hat{\mathbf{y}}_i \cdot \boldsymbol{\mu} \rangle) \cdot \|\boldsymbol{\mu}\|_2^2 \\
&\leq \gamma_{j',r'}^{(\tilde{T}-1,0)} + \frac{H\eta \|\boldsymbol{\mu}\|_2^2}{m} \cdot \max_{i \in S_+} |\ell'_i(\tilde{T}-1)|.
\end{aligned} \tag{53}$$

750 According to the third statement of Lemma B.8, we have  $\max_{i \in S_+} |\ell'_i(\tilde{T}-1, b_i^{(\tilde{T}-1)})| \leq$   
751  $C_2 \min_{i \in S_{j,r}^{(\tilde{T}-1, \tilde{b}_i^{(\tilde{T}-1)})}} |\ell'_i(\tilde{T}-1)|$ . Then by combining (52) and (53), we have

$$\frac{\sum_{i=1}^n \bar{\rho}_{j,r,i}^{(\tilde{T},0)}}{\gamma_{j',r'}^{(\tilde{T},0)}} \geq \min \left\{ \frac{\sum_{i=1}^n \bar{\rho}_{j,r,i}^{(\tilde{T}-1,0)}}{\gamma_{j',r'}^{(\tilde{T}-1,0)}}, \frac{(P-1)^2 \sigma_p^2 d}{16C_2 \|\boldsymbol{\mu}\|_2^2} \right\} = \Theta(\text{SNR}^{-2}). \tag{54}$$

752 On the other hand, we will now show  $\frac{\sum_{i=1}^n \bar{\rho}_{j,r,i}^{(t,0)}}{\gamma_{j',r'}^{(t,0)}} \leq \Theta(\text{SNR}^{-2})$  for  $t \geq T_2$  by induction. By Lemma  
753 A.1 and (52), we have

$$\begin{aligned}
\sum_{i=1}^n \bar{\rho}_{j,r,i}^{(T_2,0)} &\leq \sum_{i=1}^n \bar{\rho}_{j,r,i}^{(T_2-1,0)} + \frac{3\eta(P-1)^2 \sigma_p^2 d n}{2Bm} \\
&\leq \frac{3\eta(P-1)^2 \sigma_p^2 d n T_2}{2Bm}
\end{aligned}$$

754 And, by Equation 46, we know that at  $t = T_2$ , we have

$$\gamma_{j',r'}^{(T_2,0)} \geq \frac{\eta c_3 c_4 C T_2 n \|\boldsymbol{\mu}\|_2^2}{8Bm}$$

755 Thus,

$$\frac{\sum_{i=1}^n \bar{\rho}_{j,r,i}^{(T_2,0)}}{\gamma_{j',r'}^{(T_2,0)}} \leq \Theta(\text{SNR}^{-2})$$

756 Suppose  $\frac{\sum_{i=1}^n \bar{\rho}_{j,r,i}^{(T,0)}}{\gamma_{j',r'}^{(T,0)}} \leq \Theta(\text{SNR}^{-2})$ . According to the decomposition, we have:

$$\langle \mathbf{w}_{j,r}^{(T,b)}, \hat{\mathbf{y}}_i \boldsymbol{\mu} \rangle = \langle \mathbf{w}_{j,r}^{(0,0)}, \hat{\mathbf{y}}_i \boldsymbol{\mu} \rangle + j \cdot \gamma_{j,r}^{(T,b)} \cdot \hat{\mathbf{y}}_i$$

$$+ \frac{1}{P-1} \sum_{i=1}^n \bar{\rho}_{j,r,i}^{(T,b)} \cdot \|\xi_i\|_2^{-2} \langle \xi_i, \hat{y}_i \mu \rangle + \frac{1}{P-1} \sum_{i=1}^n \rho_{j,r,i}^{(T,b)} \cdot \|\xi_i\|_2^{-2} \langle \xi_i, \hat{y}_i \mu \rangle \quad (55)$$

757 And we have that

$$\begin{aligned} & |\langle \mathbf{w}_{j,r}^{(0,0)}, \hat{y}_i \mu \rangle + \frac{1}{P-1} \sum_{i=1}^n \bar{\rho}_{j,r,i}^{(T,b)} \cdot \|\xi_i\|_2^{-2} \langle \xi_i, \hat{y}_i \mu \rangle + \frac{1}{P-1} \sum_{i=1}^n \rho_{j,r,i}^{(T,b)} \cdot \|\xi_i\|_2^{-2} \langle \xi_i, \hat{y}_i \mu \rangle| \\ & \leq \beta/2 + \left| \sum_{i=1}^n \bar{\rho}_{j,r,i}^{(T,b)} \right| \frac{4\|\mu\|_2 \sqrt{2 \log(6n/\delta)}}{\sigma_p d(P-1)} \\ & \leq \beta/2 + \frac{\Theta(\text{SNR}^{-1}) \gamma_{j,r}^{(T,b)}}{\sqrt{d}} \\ & \leq \gamma_{j,r}^{(T,0)}, \end{aligned}$$

758 where the first inequality is due to triangle inequality and Lemma A.1, the second inequality is due  
759 to induction hypothesis, and the last inequality is due to Condition 3.1.

760 Thus, the sign of  $\langle \mathbf{w}_{j,r}^{(T,b)}, \hat{y}_i \mu \rangle$  is persistent through out the epoch. Then, without loss of generality,  
761 we suppose  $\langle \mathbf{w}_{j,r}^{(T,b)}, \mu \rangle > 0$ . Thus, the update rule of  $\gamma$  is:

$$\begin{aligned} & \gamma_{j,r}^{(t,b+1)} \\ & = \gamma_{j,r}^{(t,b)} - \frac{\eta}{Bm} \cdot \left[ \sum_{i \in \mathcal{I}_{T,b} \cap S_+ \cap S_1} \ell_i'^{(T,b)} - \sum_{i \in \mathcal{I}_{T,b} \cap S_- \cap S_1} \ell_i'^{(T,b)} \right] \|\mu\|_2^2 \\ & \geq \gamma_{j,r}^{(T,b)} + \frac{\eta}{Bm} \cdot \left[ \min_{i \in \mathcal{I}_{T,b}} \ell_i^{(T,b)} |\mathcal{I}_{T,b} \cap S_+ \cap S_1| - \max_{i \in \mathcal{I}_{T,b}} |\mathcal{I}_{T,b} \cap S_- \cap S_{-1}| \right] \cdot \|\mu\|_2^2. \end{aligned} \quad (56)$$

762 Therefore,

$$\gamma_{j,r}^{(T+1,0)} \geq \gamma_{j,r}^{(T,b)} + \frac{\eta}{Bm} \cdot \left[ \min \ell_i^{(T,b_i^{(T)})} |S_+ \cap S_1| - \max \ell_i^{(T,b_i^{(T)})} |S_- \cap S_{-1}| \right] \cdot \|\mu\|_2^2. \quad (57)$$

763 And, by (52), we have

$$\sum_{i=1}^n \bar{\rho}_{j,r,i}^{(T+1,0)} \leq \sum_{i=1}^n \bar{\rho}_{j,r,i}^{(T,0)} + \frac{\eta(P-1)^2 \sigma_p^2 d H \Phi(-1)}{8m} \cdot \max |\ell_i'^{(T,b_i^{(T)})}| \quad (58)$$

764 Thus, combining (57) and (58), we have

$$\begin{aligned} & \frac{\sum_{i=1}^n \bar{\rho}_{j,r,i}^{(T+1,0)}}{\gamma_{j,r}^{(T+1,0)}} \\ & \leq \max \left\{ \frac{\sum_{i=1}^n \bar{\rho}_{j,r,i}^{(T,0)}}{\gamma_{j,r}^{(T,0)}}, \frac{(P-1)^2 \sigma_p^2 d n \Phi(-1) \cdot \max |\ell_i'^{(T,b_i^{(T)})}|}{8 \left[ \min \ell_i^{(T,b_i^{(T)})} |S_+ \cap S_1| - \max \ell_i^{(T,b_i^{(T)})} |S_- \cap S_{-1}| \right] \cdot \|\mu\|_2^2} \right\} \\ & \leq \Theta(\text{SNR}^{-2}) \end{aligned} \quad (59)$$

765 where the last inequality is due to induction hypothesis, third statement of Lemma B.8, and  
766 Lemma A.5. Thus, by induction, we have for all  $T_1 \leq t \leq T^*$  that

$$\frac{\sum_{i=1}^n \bar{\rho}_{j,r,i}^{(t,0)}}{\gamma_{j',r'}^{(t,0)}} \leq \Theta(\text{SNR}^{-2})$$

767 And for  $(T_1, 0) \leq (t, b) \leq (T^*, 0)$ , we can bound the ratio as follows:

$$\frac{\sum_{i=1}^n \bar{\rho}_{j,r,i}^{(t,b)}}{\gamma_{j',r'}^{(t,b)}} \leq \frac{4 \sum_{i=1}^n \bar{\rho}_{j,r,i}^{(t,0)}}{\gamma_{j',r'}^{(t,0)}} \leq \Theta(\text{SNR}^{-2}),$$

768 where the first inequality is due to the update rule of  $\bar{\rho}_{j,r,i}^{(t,b)}$  and  $\bar{\rho}_{j,r,i}^{(t,b)}$ . Thus, we have completed the  
769 proof.  $\square$

### 770 B.3 Test Error

771 In this section, we present and prove the exact upper bound and lower bound of test error in  
 772 Theorem 3.2. Since we have resolved the challenges brought by stochastic mini-batch parameter  
 773 update, the remaining proof for test error is similar to the counterpart in Kou et al. (2023).

#### 774 B.3.1 Test Error Upper Bound

775 First, we prove the upper bound of test error in Theorem 3.2 when the training loss converges to  $\epsilon$ .

776 **Theorem B.17** (Second part of Theorem 3.2). *Under the same conditions as Theorem 3.2, then*  
 777 *there exists a large constant  $C_1$  such that when  $n\|\boldsymbol{\mu}\|_2^2 \geq C_1(P-1)^4\sigma_p^4d$ , for time  $t$  defined in*  
 778 *Lemma B.15, we have the test error*

$$\mathbb{P}_{(\mathbf{x}, y) \sim \mathcal{D}}(y \neq \text{sign}(f(\mathbf{W}^{(t,0)}, \mathbf{x}))) \leq p + \exp\left(-n\|\boldsymbol{\mu}\|_2^4 / (C_2(P-1)^4\sigma_p^4d)\right),$$

779 where  $C_2 = O(1)$ .

780 *Proof.* The proof is similar to the proof of Theorem E.1 in Kou et al. (2023). The only difference is  
 781 substituting  $\boldsymbol{\xi}$  in their proof with  $(P-1)\boldsymbol{\xi}$ .  $\square$

#### 782 B.3.2 Test Error Lower Bound

783 In this part, we prove the lower bound of the test error in Theorem 3.2. We give two key Lemmas.

784 **Lemma B.18.** *For  $(T_1, 0) \leq (t, b) < (T^*, 0)$ , denote  $g(\boldsymbol{\xi}) = \sum_{j,r} j(P-1)\sigma(\langle \mathbf{w}_{j,r}^{(t,b)}, \boldsymbol{\xi} \rangle)$ . There*  
 785 *exists a fixed vector  $\mathbf{v}$  with  $\|\mathbf{v}\|_2 \leq 0.06\sigma_p$  such that*

$$\sum_{j' \in \{\pm 1\}} [g(j'\boldsymbol{\xi} + \mathbf{v}) - g(j'\boldsymbol{\xi})] \geq 4C_6 \max_{j \in \{\pm 1\}} \left\{ \sum_r \gamma_{j,r}^{(t,b)} \right\}, \quad (60)$$

786 for all  $\boldsymbol{\xi} \in \mathbb{R}^d$ .

787 *Proof of Lemma B.18.* The proof is similar to the proof of Lemma 5.8 in Kou et al. (2023). The only  
 788 difference is substituting  $\boldsymbol{\xi}$  in their proof with  $(P-1)\boldsymbol{\xi}$ .  $\square$

789 **Lemma B.19** (Proposition 2.1 in Devroye et al. (2018)). *The TV distance between  $\mathcal{N}(0, \sigma_p^2 \mathbf{I}_d)$  and*  
 790  *$\mathcal{N}(\mathbf{v}, \sigma_p^2 \mathbf{I}_d)$  is smaller than  $\|\mathbf{v}\|_2 / 2\sigma_p$ .*

791 Then, we can prove the lower bound of the test error.

792 **Theorem B.20** (Third part of Theorem 3.2). *Suppose that  $n\|\boldsymbol{\mu}\|_2^4 \leq C_3d(P-1)^4\sigma_p^4$ , then we have*  
 793 *that  $L_{\mathcal{D}}^{0-1}(\mathbf{W}^{(t,0)}) \geq p + 0.1$ , where  $C_3$  is an sufficiently large absolute constant.*

794 *Proof.* The proof is similar to the proof of Theorem 4.3 in Kou et al. (2023). The only difference is  
 795 substituting  $\boldsymbol{\xi}$  in their proof with  $(P-1)\boldsymbol{\xi}$ .  $\square$

### 796 C SAM algorithm

797 The following lemma shows the update rule of the neural network

798 **Lemma C.1.** *We denote  $\ell_i'^{(t,b)} = \ell'[y_i \cdot f(\mathbf{W}^{(t,b)}, \mathbf{x}_i)]$ , then the adversarial point of  $\mathbf{W}^{(t,b)}$  is*  
 799  *$\mathbf{W}^{(t,b)} + \hat{\boldsymbol{\epsilon}}^{(t,b)}$ , where*

$$\hat{\boldsymbol{\epsilon}}_{j,r}^{(t,b)} = \frac{\tau \sum_{i \in \mathcal{I}_{t,b}} \sum_{p \in [P]} \ell_i'^{(t,b)} j \cdot y_i \sigma'(\langle \mathbf{w}_{j,r}^{(t,b)}, \mathbf{x}_{i,p} \rangle) \mathbf{x}_{i,p}}{m \|\nabla_{\mathbf{W}} L_{\mathcal{I}_{t,b}}(\mathbf{W}^{(t,b)})\|_F}.$$

800 Then the training update rule of the parameter is

$$\mathbf{w}_{j,r}^{(t+1,b)} = \mathbf{w}_{j,r}^{(t,b)} - \frac{\eta}{Bm} \sum_{i \in \mathcal{I}_{t,b}} \sum_{p \in [P]} \ell_i'^{(t,b)} \sigma'(\langle \mathbf{w}_{j,r}^{(t,b)} + \hat{\boldsymbol{\epsilon}}_{j,r}^{(t,b)}, \mathbf{x}_{i,p} \rangle) j \cdot \mathbf{x}_{i,p}$$

$$\begin{aligned}
&= \mathbf{w}_{j,r}^{(t,b)} - \frac{\eta}{Bm} \sum_{i \in \mathcal{I}_{t,b}} \sum_{p \in [P]} \ell_i'^{(t,b)} \sigma'(\langle \mathbf{w}_{j,r}^{(t,b)}, \mathbf{x}_{i,p} \rangle + \langle \hat{\epsilon}_{t,j,r}, \mathbf{x}_{i,p} \rangle) j \cdot \mathbf{x}_{i,p} \\
&= \mathbf{w}_{j,r}^{(t,b)} - \frac{\eta}{Bm} \sum_{i \in \mathcal{I}_{t,b}} \ell_i'^{(t,b)} \sigma'(\langle \mathbf{w}_{j,r}^{(t,b)}, y_i \boldsymbol{\mu} \rangle + \langle \hat{\epsilon}_{t,j,r}, y_i \boldsymbol{\mu} \rangle) j \boldsymbol{\mu} \\
&\quad - \underbrace{\frac{\eta(P-1)}{Bm} \sum_{i \in \mathcal{I}_{t,b}} \ell_i'^{(t,b)} \sigma'(\langle \mathbf{w}_{j,r}^{(t,b)}, \boldsymbol{\xi}_i \rangle + \langle \hat{\epsilon}_{t,j,r}, \boldsymbol{\xi}_i \rangle) j y_i \boldsymbol{\xi}_i}_{\text{NoiseTerm}}
\end{aligned}$$

801 We will show that the noise term will be small if we train with SAM algorithm. We consider the first  
802 stage where  $t \leq T_1$  where  $T_1 = mn/(12B\eta\|\boldsymbol{\mu}\|_2^2)$ . Then the following property holds.

803 **Proposition C.2.** *Under Assumption 3.1, for  $0 \leq t \leq T_1$ , we have that*

$$\gamma_{j,r}^{(0,0)}, \bar{\rho}_{j,r,i}^{(0,0)}, \underline{\rho}_{j,r,i}^{(0,0)} = 0 \quad (61)$$

$$0 \leq \gamma_{j,r}^{(t,b)} \leq 1/12, \quad (62)$$

$$0 \leq \bar{\rho}_{j,r,i}^{(t,b)} \leq 1/12, \quad (63)$$

$$0 \geq \underline{\rho}_{j,r,i}^{(t,b)} \geq -\beta - 10\sqrt{\frac{\log(6n^2/\delta)}{d}}n, \quad (64)$$

804 Besides,  $\gamma_{j,r}^{(T_1,0)} = \Omega(1)$ .

805 **Lemma C.3.** *Under Assumption 3.1, suppose (25), (26) and (27) hold at iteration  $t$ . Then, for all*  
806  $r \in [m], j \in \{\pm 1\}$  and  $i \in [n]$ ,

$$|\langle \mathbf{w}_{j,r}^{(t,b)} - \mathbf{w}_{j,r}^{(0,0)}, \boldsymbol{\mu} \rangle - j \cdot \gamma_{j,r}^{(t,b)}| \leq \text{SNR} \sqrt{\frac{32 \log(6n/\delta)}{d}} n \alpha, \quad (65)$$

$$|\langle \mathbf{w}_{j,r}^{(t,b)} - \mathbf{w}_{j,r}^{(0,0)}, \boldsymbol{\xi}_i \rangle - \frac{1}{P-1} \underline{\rho}_{j,r,i}^{(t,b)}| \leq \frac{5}{P-1} \sqrt{\frac{\log(6n^2/\delta)}{d}} n \alpha, j \neq y_i, \quad (66)$$

$$|\langle \mathbf{w}_{j,r}^{(t,b)} - \mathbf{w}_{j,r}^{(0,0)}, \boldsymbol{\xi}_i \rangle - \frac{1}{P-1} \bar{\rho}_{j,r,i}^{(t,b)}| \leq \frac{5}{P-1} \sqrt{\frac{\log(6n^2/\delta)}{d}} n \alpha, j = y_i. \quad (67)$$

807 *Proof of Lemma C.3.* Notice that  $1/12 < \alpha$ , if the condition (62), (63), (64) holds, (25), (26) and  
808 (27) also holds. Therefore, by Lemma B.3, we know that Lemma C.3 also hold.  $\square$

809 **Lemma C.4.** *Under Assumption 3.1, suppose (62), (63), (64) hold at iteration  $t, b$ . Then, for all*  
810  $j \in \{\pm 1\}$  and  $i \in [n]$ ,  $F_j(\mathbf{W}_j^{(t,b)}, \mathbf{x}_i) \leq 0.5$ . Therefore  $-0.3 \geq \ell_i' \geq -0.7$ .

811 *Proof.* Notice that  $1/12 < \alpha$ , if the condition (62), (63), (64) holds, (25), (26) and (27) also holds.  
812 Therefore, by Lemma B.4, we know that for all  $j \neq y_i$  and  $i \in [n]$ ,  $F_j(\mathbf{W}_j^{(t,b)}, \mathbf{x}_i) \leq 0.5$ . Next we  
813 will show that for  $j = y_i$ ,  $F_j(\mathbf{W}_j^{(t,b)}, \mathbf{x}_i) \leq 0.5$  also holds.

814 According to Lemma C.3, we have

$$\begin{aligned}
F_j(\mathbf{W}_j^{(t,b)}, \mathbf{x}_i) &= \frac{1}{m} \sum_{r=1}^m [\sigma(\langle \mathbf{w}_{j,r}^{(t,b)}, y_i \boldsymbol{\mu} \rangle) + (P-1)\sigma(\langle \mathbf{w}_{j,r}^{(t,b)}, \boldsymbol{\xi}_i \rangle)] \\
&\leq 2 \max\{|\langle \mathbf{w}_{j,r}^{(t,b)}, y_i \boldsymbol{\mu} \rangle|, (P-1)|\langle \mathbf{w}_{j,r}^{(t,b)}, \boldsymbol{\xi}_i \rangle|\} \\
&\leq 6 \max\left\{|\langle \mathbf{w}_{j,r}^{(0)}, \hat{y}_i \boldsymbol{\mu} \rangle|, (P-1)|\langle \mathbf{w}_{j,r}^{(0)}, \boldsymbol{\xi}_i \rangle|, \text{SNR} \sqrt{\frac{32 \log(6n/\delta)}{d}} n \alpha, \right. \\
&\quad \left. 5\sqrt{\frac{\log(6n^2/\delta)}{d}} n \alpha, |\gamma_{j,r}^{(t,b)}|, |\underline{\rho}_{j,r,i}^{(t,b)}| \right\} \\
&\leq 6 \max\left\{\beta, \text{SNR} \sqrt{\frac{32 \log(6n/\delta)}{d}} n \alpha, 5\sqrt{\frac{\log(6n^2/\delta)}{d}} n \alpha, |\gamma_{j,r}^{(t,b)}|, |\bar{\rho}_{j,r,i}^{(t,b)}| \right\}
\end{aligned}$$

$$\leq 0.5,$$

815 where the second inequality is by (65), (66) and (67); the third inequality is due to the definition of  $\beta$ ;  
816 the last inequality is by (23), (62), (63).

817 Since  $F_j(\mathbf{W}_j^{(t,b)}, \mathbf{x}_i) \in [0, 0.5]$  we know that

$$-0.3 \geq -\frac{1}{1 + \exp(0.5)} \geq \ell'_i \geq -\frac{1}{1 + \exp(-0.5)} \geq -0.7.$$

818

□

819 Based on the previous foundation lemmas, we can provide the key lemma of SAM which is different  
820 from the dynamic of SGD.

821 **Lemma C.5.** *Under Assumption 3.1, suppose (62), (63) and (64) hold at iteration  $t, b$ . We have that*  
822 *if  $\langle \mathbf{w}_{j,r}^{(t,b)}, \boldsymbol{\xi}_k \rangle \geq 0$ ,  $k \in \mathcal{I}_{t,b}$  and  $j = y_k$ , then  $\langle \mathbf{w}_{j,r}^{(t,b)} + \hat{\boldsymbol{\epsilon}}_{j,r}^{(t,b)}, \boldsymbol{\xi}_k \rangle < 0$ .*

823 *Proof.* We first prove that there for  $t \leq T_1$ , there exists a constant  $C_2$  such that

$$\|\nabla_{\mathbf{W}} L_{\mathcal{I}_{t,b}}(\mathbf{W}^{(t,b)})\|_F \leq C_2 P \sigma_p \sqrt{d/B}.$$

824 Recall that

$$L_{\mathcal{I}_{t,b}}(\mathbf{W}^{(t,b)}) = \frac{1}{B} \sum_{i \in \mathcal{I}_{t,b}} \ell(y_i f(\mathbf{W}^{(t,b)}, x_i)),$$

825 we have

$$\begin{aligned} \nabla_{\mathbf{w}_{j,r}} L_{\mathcal{I}_{t,b}}(\mathbf{W}^{(t,b)}) &= \frac{1}{B} \sum_{i \in \mathcal{I}_{t,b}} \nabla_{\mathbf{w}_{j,r}} \ell(y_i f(\mathbf{W}^{(t,b)}, \mathbf{x}_i)) \\ &= \frac{1}{B} \sum_{i \in \mathcal{I}_{t,b}} y_i \ell'(\langle \mathbf{w}_{j,r}^{(t,b)}, \mathbf{x}_i \rangle) \nabla_{\mathbf{w}_{j,r}} f(\mathbf{W}^{(t,b)}, \mathbf{x}_i) \\ &= \frac{1}{Bm} \sum_{i \in \mathcal{I}_{t,b}} y_i \ell'_i(\langle \mathbf{w}_{j,r}^{(t,b)}, \boldsymbol{\mu} \rangle) [\sigma'(\langle \mathbf{w}_{j,r}^{(t,b)}, \boldsymbol{\mu} \rangle) \cdot \boldsymbol{\mu} + \sigma'(\langle \mathbf{w}_{j,r}^{(t,b)}, \boldsymbol{\xi}_i \rangle) \cdot (P-1)\boldsymbol{\xi}_i]. \end{aligned}$$

826 We have

$$\begin{aligned} &\|\nabla_{\mathbf{w}_{j,r}} L_{\mathcal{I}_{t,b}}(\mathbf{W}^{(t,b)})\|_2 \\ &\leq \frac{1}{Bm} \left\| \sum_{i \in \mathcal{I}_{t,b}} |\ell'_i(\langle \mathbf{w}_{j,r}^{(t,b)}, \boldsymbol{\mu} \rangle)| \cdot \sigma'(\langle \mathbf{w}_{j,r}^{(t,b)}, \boldsymbol{\mu} \rangle) \cdot \boldsymbol{\mu} + \frac{1}{Bm} \left\| \sum_{i \in \mathcal{I}_{t,b}} |\ell'_i(\langle \mathbf{w}_{j,r}^{(t,b)}, \boldsymbol{\xi}_i \rangle)| \cdot \sigma'(\langle \mathbf{w}_{j,r}^{(t,b)}, \boldsymbol{\xi}_i \rangle) \cdot (P-1)\boldsymbol{\xi}_i \right\|_2 \right\|_2 \\ &\leq 0.7m^{-1} \|\boldsymbol{\mu}\|_2 + 1.4(P-1)m^{-1} \sigma_p \sqrt{d/B} \\ &\leq 2Pm^{-1} \sigma_p \sqrt{d/B} \end{aligned}$$

827 and

$$\|\nabla_{\mathbf{W}} L_{\mathcal{I}_{t,b}}(\mathbf{W}^{(t,b)})\|_F^2 = \sum_{j,r} \|\nabla_{\mathbf{w}_{j,r}} L_{\mathcal{I}_{t,b}}(\mathbf{W}^{(t,b)})\|_2^2 \leq 2m(2Pm^{-1} \sigma_p \sqrt{d/B})^2,$$

828 leading to

$$\|\nabla_{\mathbf{W}} L_{\mathcal{I}_{t,b}}(\mathbf{W}^{(t,b)})\|_F \leq 2\sqrt{2}P\sigma_p \sqrt{d/Bm}.$$

829 From Lemma C.1, we have

$$\begin{aligned} \langle \hat{\boldsymbol{\epsilon}}_{j,r}^{(t,b)}, \boldsymbol{\xi}_k \rangle &= \frac{\tau}{mB} \|\nabla_{\mathbf{W}} L_{\mathcal{I}_{t,b}}(\mathbf{W}^{(t,b)})\|_F^{-1} \sum_{i \in \mathcal{I}_{t,b}} \sum_{p \in [P]} \ell'_i(\langle \mathbf{w}_{j,r}^{(t,b)}, \mathbf{x}_{i,p} \rangle) y_i \sigma'(\langle \mathbf{w}_{j,r}^{(t,b)}, \mathbf{x}_{i,p} \rangle) \langle \mathbf{x}_{i,p}, \boldsymbol{\xi}_k \rangle \\ &= \frac{\tau}{mB} \|\nabla_{\mathbf{W}} L_{\mathcal{I}_{t,b}}(\mathbf{W}^{(t,b)})\|_F^{-1} \cdot \left( \sum_{i \in \mathcal{I}_{t,b}, i \neq k} \ell'_i(\langle \mathbf{w}_{j,r}^{(t,b)}, \mathbf{x}_i \rangle) y_i \cdot (P-1) \sigma'(\langle \mathbf{w}_{j,r}^{(t,b)}, \boldsymbol{\xi}_i \rangle) \langle \boldsymbol{\xi}_i, \boldsymbol{\xi}_k \rangle \right. \\ &\quad \left. + \ell'_k(\langle \mathbf{w}_{j,r}^{(t,b)}, \mathbf{x}_k \rangle) y_k \cdot (P-1) \sigma'(\langle \mathbf{w}_{j,r}^{(t,b)}, \boldsymbol{\xi}_k \rangle) \langle \boldsymbol{\xi}_k, \boldsymbol{\xi}_k \rangle \right) \end{aligned}$$



$$\begin{aligned}
& + \sum_{i \in \mathcal{I}_{t,b}} \ell'_i(t,b) j \cdot \sigma'(\langle \mathbf{w}_{j,r}^{(t,b)}, y_i \boldsymbol{\mu} \rangle \langle \boldsymbol{\mu}, \boldsymbol{\xi}_k \rangle) \\
& \leq \frac{\tau}{mC_2P\sigma_p\sqrt{Bd}} \left[ 0.8B(P-1)\sigma_P^2 \sqrt{d \log(6n^2/\delta)} + 0.4B\sigma_P \|\boldsymbol{\mu}\|_2 \sqrt{2 \log(6n^2/\delta)} \right. \\
& \quad \left. - 0.15(P-1)\sigma_P^2 d \right] \\
& < -C \frac{\tau\sigma_p\sqrt{d}}{m\sqrt{B}} \\
& = -\frac{1}{4(P-1)}, \tag{68}
\end{aligned}$$

830 where we the last equality is by choosing  $\tau = \frac{m\sqrt{B}}{C_3P\sigma_p\sqrt{d}}$ . Now we give an upper bound of  $\langle \mathbf{w}_{j,r}^{(t)}, \boldsymbol{\xi}_k \rangle$ ,  
831 by (67) we have that

$$\langle \mathbf{w}_{j,r}^{(t)}, \boldsymbol{\xi}_k \rangle \leq 3 \max \left\{ |\langle \mathbf{w}_{j,r}^{(0)}, \boldsymbol{\xi}_i \rangle|, 5\sqrt{\frac{\log(6n^2/\delta)}{d}} n\alpha, |\bar{\rho}_{j,r,i}^{(t,b)}| \right\} \leq 1/(4(P-1)). \tag{69}$$

832 Combining (68) and (69) completes the proof.  $\square$

833 **Lemma C.6.** *Under Assumption 3.1, suppose (62), (63), (64) hold at iteration  $t, b$ . Then (63) also*  
834 *holds for  $t, b+1$*

835 *Proof.* Now consider the SAM algorithm. Recall that

$$\bar{\rho}_{j,r,i}^{(t,b+1)} = \bar{\rho}_{j,r,i}^{(t,b)} - \frac{\eta(P-1)^2}{Bm} \cdot \ell'_i(t,b) \cdot \sigma'(\langle \mathbf{w}_{j,r}^{(t)} + \hat{\boldsymbol{\epsilon}}_{j,r}^{(t)}, \boldsymbol{\xi}_i \rangle) \cdot \|\boldsymbol{\xi}_i\|_2^2 \cdot \mathbb{1}(y_i = j) \mathbb{1}(i \in \mathcal{I}_{t,b}).$$

836 **Case1:**  $i \notin \mathcal{I}_{t,b}$ . In this case, clearly we have that  $\bar{\rho}_{j,r,i}^{(t,b+1)} = \bar{\rho}_{j,r,i}^{(t,b)} \leq 1/12$ .

837 **Case2:**  $i \in \mathcal{I}_{t,b}$  and  $\langle \mathbf{w}_{j,r}^{(t,b)}, \boldsymbol{\xi}_i \rangle \geq 0$ , then by Lemma C.5, we have that  $\langle \mathbf{w}_{j,r}^{(t)} + \hat{\boldsymbol{\epsilon}}_{j,r}^{(t)}, \boldsymbol{\xi}_k \rangle < 0$ ,  
838 therefore we have that  $\bar{\rho}_{j,r,i}^{(t,b+1)} = \bar{\rho}_{j,r,i}^{(t,b)} \leq 1/12$ .

839 **Case3:**  $i \in \mathcal{I}_{t,b}$  and  $\langle \mathbf{w}_{j,r}^{(t,b)}, \boldsymbol{\xi}_i \rangle \leq 0$  then by (67) and triangle inequality, we can conclude that  $\bar{\rho}_{j,r,i}^{(t,b)}$   
840 can not reach a constant order,

$$\bar{\rho}_{j,r,i}^{(t,b)} \leq (P-1) |\langle \mathbf{w}_{j,r}^{(t,b)} - \mathbf{w}_{j,r}^{(0,0)}, \boldsymbol{\xi}_i \rangle| + 5\sqrt{\frac{\log(6n^2/\delta)}{d}} n\alpha.$$

841 Then we can give an upper bound for  $\bar{\rho}_{j,r,i}^{(t+1,b)}$  since we only take one small step further,

$$\bar{\rho}_{j,r,i}^{(t,b+1)} \leq (P-1) |\langle \mathbf{w}_{j,r}^{(t,b)} - \mathbf{w}_{j,r}^{(0,0)}, \boldsymbol{\xi}_i \rangle| + 5\sqrt{\frac{\log(6n^2/\delta)}{d}} n\alpha + \frac{\eta(P-1)^2}{Bm} \cdot 2d\sigma_p^2 \leq 1/12.$$

842  $\square$

843 *Proof of Proposition C.2.* We will use induction to give the proof. The results are obvious hold at  
844  $t = 0$  as all the coefficients are zero. Suppose that there exists  $\tilde{T} \leq T_1$  such that the results in  
845 Proposition C.2 hold for all time  $(0, 0) \leq (t, b) \leq (\tilde{T} - 1, \tilde{b} - 1)$ . We aim to prove that (62), (63),  
846 (64) also hold for iteration  $(\tilde{T} - 1, \tilde{b})$ .

847 First, we prove that (62) holds for iteration  $(\tilde{T} - 1, \tilde{b})$ . Notice that

$$\gamma_{j,r}^{(t,b+1)} = \gamma_{j,r}^{(t,b)} - \frac{\eta}{Bm} \cdot \sum_{i \in \mathcal{I}_{t,b}} \ell'_i(t,b) \sigma'(\langle \mathbf{w}_{j,r}^{(t,b)}, y_i \cdot \boldsymbol{\mu} \rangle) \cdot \|\boldsymbol{\mu}\|_2^2 \leq \gamma_{j,r}^{(t,b)} + \frac{\eta}{m} \|\boldsymbol{\mu}\|_2^2$$

848 where the last inequality is by the fact that  $|\ell'_i(t,b+1)| \leq 1$  and  $\sigma' \leq 1$ . Notice that  $\tilde{T} - 1 \leq T_1$ , we  
849 can conclude that,

$$\gamma_{j,r}^{(\tilde{T}, \tilde{b})} \leq T_1 \cdot (n/B) \cdot \frac{\eta}{m} \|\boldsymbol{\mu}\|_2^2 \leq 1/12.$$

850 Second, by Lemma C.6, we know that (63) holds for  $(\tilde{T} - 1, \tilde{b})$ .

851 Last, we need to prove that (64) holds  $(\tilde{T} - 1, \tilde{b})$ . The prove is similar to previous proof without  
852 SAM.

853 When  $\underline{\rho}_{j,r,k}^{(\tilde{T}-1,\tilde{b}-1)} < -0.5(P-1)\beta - 6\sqrt{\frac{\log(6n^2/\delta)}{d}}n\alpha$ , by (29), we have

$$\langle \mathbf{w}_{j,r}^{(\tilde{T}-1,\tilde{b}-1)}, \boldsymbol{\xi}_k \rangle < \langle \mathbf{w}_{j,r}^{(0,0)}, \boldsymbol{\xi}_k \rangle + \frac{1}{P-1} \underline{\rho}_{j,r,k}^{(\tilde{T}-1,\tilde{b}-1)} + \frac{5}{P-1} \sqrt{\frac{\log(6n^2/\delta)}{d}} n\alpha \leq -\frac{1}{P-1} \sqrt{\frac{\log(6n^2/\delta)}{d}} n\alpha,$$

854 and we have

$$\begin{aligned} \langle \hat{\boldsymbol{\epsilon}}_{j,r}^{(\tilde{T}-1,\tilde{b}-1)}, \boldsymbol{\xi}_i \rangle &= \frac{\tau}{mB} \|\nabla \mathbf{w} L_{\mathcal{I}_{\tilde{T}-1,\tilde{b}-1}}(\mathbf{W}^{(\tilde{T}-1,\tilde{b}-1)})\|_F^{-1} \sum_{i \in \mathcal{I}_{\tilde{T}-1,\tilde{b}-1}} \sum_{p \in [P]} \ell'_i(\tilde{T}-1,\tilde{b}-1) j \cdot y_i \\ &\quad \sigma'(\langle \mathbf{w}_{j,r}^{(\tilde{T}-1,\tilde{b}-1)}, \mathbf{x}_{i,p} \rangle) \langle \mathbf{x}_{i,p}, \boldsymbol{\xi}_k \rangle \\ &= \frac{\tau}{mB} \|\nabla \mathbf{w} L_{\mathcal{I}_{\tilde{T}-1,\tilde{b}-1}}(\mathbf{W}^{(\tilde{T}-1,\tilde{b}-1)})\|_F^{-1} \cdot \left( \sum_{i \in \mathcal{I}_{\tilde{T}-1,\tilde{b}-1}, i \neq k} \ell'_i(\tilde{T}-1,\tilde{b}-1) j \cdot y_i \right. \\ &\quad (P-1) \sigma'(\langle \mathbf{w}_{j,r}^{(\tilde{T}-1,\tilde{b}-1)}, \boldsymbol{\xi}_i \rangle) \langle \boldsymbol{\xi}_i, \boldsymbol{\xi}_k \rangle + \ell'_k(\tilde{T}-1,\tilde{b}-1) j y_k \cdot (P-1) \sigma'(\langle \mathbf{w}_{j,r}^{(\tilde{T}-1,\tilde{b}-1)}, \boldsymbol{\xi}_k \rangle) \langle \boldsymbol{\xi}_k, \boldsymbol{\xi}_k \rangle \\ &\quad \left. + \sum_{i \in \mathcal{I}_{\tilde{T}-1,\tilde{b}-1}} \ell'_i(\tilde{T}-1,\tilde{b}-1) j \cdot \sigma'(\langle \mathbf{w}_{j,r}^{(\tilde{T}-1,\tilde{b}-1)}, y_i \boldsymbol{\mu} \rangle) \langle \boldsymbol{\mu}, \boldsymbol{\xi}_k \rangle \right) \\ &\leq \frac{\tau}{mC_2 P \sigma_p \sqrt{Bd}} \left[ 0.8B(P-1)\sigma_P^2 \sqrt{d \log(6n^2/\delta)} + 0.4B\sigma_P \|\boldsymbol{\mu}\|_2 \sqrt{2 \log(6n^2/\delta)} \right] \\ &\leq C_4 \frac{\tau \sqrt{B} \sigma_p \sqrt{\log(6n^2/\delta)}}{m} \\ &= C_4 \frac{B \sqrt{\log(6n^2/\delta)}}{C_3 P \sqrt{d}} \\ &\leq \frac{1}{P} \sqrt{\frac{\log(6n^2/\delta)}{d}} n\alpha, \end{aligned}$$

855 and thus  $\langle \mathbf{w}_{j,r}^{(\tilde{T}-1,\tilde{b}-1)} + \hat{\boldsymbol{\epsilon}}_{j,r}^{(\tilde{T}-1,\tilde{b}-1)}, \boldsymbol{\xi}_i \rangle < 0$  which leads to

$$\begin{aligned} \underline{\rho}_{j,r,i}^{(\tilde{T}-1,\tilde{b})} &= \underline{\rho}_{j,r,i}^{(\tilde{T}-1,\tilde{b}-1)} + \frac{\eta(P-1)^2}{Bm} \cdot \ell'_i(\tilde{T}-1,\tilde{b}-1) \cdot \sigma'(\langle \mathbf{w}_{j,r}^{(\tilde{T}-1,\tilde{b}-1)}, \boldsymbol{\xi}_i \rangle) \cdot \|\boldsymbol{\xi}_i\|_2^2 \cdot \mathbf{1}(y_i = -j) \mathbf{1}(i \in \mathcal{I}_{\tilde{T}-1,\tilde{b}-1}) \\ &= \underline{\rho}_{j,r,i}^{(\tilde{T}-1,\tilde{b}-1)}. \end{aligned}$$

856 Therefore, we have

$$\underline{\rho}_{j,r,i}^{(\tilde{T}-1,\tilde{b})} = \underline{\rho}_{j,r,i}^{(\tilde{T}-1,\tilde{b}-1)} \geq -(P-1)\beta - 5P \sqrt{\frac{\log(6n^2/\delta)}{d}} n\alpha.$$

857 When  $\underline{\rho}_{j,r,i}^{(\tilde{T}-1,\tilde{b}-1)} \geq -0.5(P-1)\beta - 5\sqrt{\frac{\log(6n^2/\delta)}{d}} n\alpha$ , we have that

$$\begin{aligned} \underline{\rho}_{j,r,i}^{(\tilde{T}-1,\tilde{b})} &\geq \underline{\rho}_{j,r,i}^{(\tilde{T}-1,\tilde{b}-1)} + \frac{\eta(P-1)^2}{Bm} \cdot \ell'_i(\tilde{T}-1,\tilde{b}-1) \cdot \|\boldsymbol{\xi}_i\|_2^2 \\ &\geq \underline{\rho}_{j,r,i}^{(\tilde{T}-1,\tilde{b}-1)} - \frac{0.4\eta(P-1)^2}{Bm} \cdot 2d\sigma_p^2 \\ &\geq -(P-1)\beta - 5P \sqrt{\frac{\log(6n^2/\delta)}{d}} n\alpha. \end{aligned}$$

858 Therefore, the induction is completed and thus Proposition C.2 holds.

859 Next, we will prove that  $\gamma_{j,r}^{(t)}$  can achieve  $\Omega(1)$  after  $T_1 = mB/(12n\eta\|\boldsymbol{\mu}\|_2^2)$  iterations. By  
860 Lemma A.6, we know that there exists  $c_3 \cdot T_1$  epochs such that at least  $c_4 \cdot H$  batches in these

861 epochs, satisfy

$$|S_+ \cap S_y \cap \mathcal{I}_{t,b}| \in \left[ \frac{B}{4}, \frac{3B}{4} \right]$$

862 for both  $y = +1$  and  $y = -1$ . For SAM, we have the following update rule for  $\gamma_{j,r}^{(t,b)}$ :

$$\begin{aligned} \gamma_{j,r}^{(t,b+1)} &= \gamma_{j,r}^{(t,b)} - \frac{\eta}{Bm} \sum_{i \in \mathcal{I}_{t,b} \cap S_+} \ell_i^{(t,b)} \sigma'(\langle \mathbf{w}_{j,r}^{(t,b)} + \hat{\mathbf{e}}_{j,r}^{(t,b)}, y_i \cdot \boldsymbol{\mu} \rangle) \cdot \|\boldsymbol{\mu}\|_2^2 \\ &\quad + \frac{\eta}{Bm} \sum_{i \in \mathcal{I}_{t,b} \cap S_-} \ell_i^{(t,b)} \sigma'(\langle \mathbf{w}_{j,r}^{(t,b)} + \hat{\mathbf{e}}_{j,r}^{(t,b)}, y_i \cdot \boldsymbol{\mu} \rangle) \cdot \|\boldsymbol{\mu}\|_2^2. \end{aligned}$$

863 If  $\langle \mathbf{w}_{j,r}^{(t,b)} + \hat{\mathbf{e}}_{j,r}^{(t,b)}, \boldsymbol{\mu} \rangle \geq 0$ , we have

$$\begin{aligned} \gamma_{j,r}^{(t,b+1)} &= \gamma_{j,r}^{(t,b)} - \frac{\eta}{Bm} \cdot \left[ \sum_{i \in \mathcal{I}_{t,b} \cap S_+ \cap S_1} \ell_i^{(t)} - \sum_{i \in \mathcal{I}_{t,b} \cap S_+ \cap S_{-1}} \ell_i^{(t)} \right] \|\boldsymbol{\mu}\|_2^2 \\ &\geq \gamma_{j,r}^{(t,b)} + \frac{\eta}{Bm} \cdot (0.3|\mathcal{I}_{t,b} \cap S_+ \cap S_1| - 0.7|\mathcal{I}_{t,b} \cap S_+ \cap S_{-1}|) \cdot \|\boldsymbol{\mu}\|_2^2. \end{aligned}$$

864 If  $\langle \mathbf{w}_{j,r}^{(t,b)} + \hat{\mathbf{e}}_{j,r}^{(t,b)}, \boldsymbol{\mu} \rangle < 0$ , we have

$$\begin{aligned} \gamma_{j,r}^{(t,b+1)} &= \gamma_{j,r}^{(t,b)} + \frac{\eta}{Bm} \cdot \left[ \sum_{i \in \mathcal{I}_{t,b} \cap S_+ \cap S_{-1}} \ell_i^{(t)} - \sum_{i \in \mathcal{I}_{t,b} \cap S_+ \cap S_1} \ell_i^{(t)} \right] \|\boldsymbol{\mu}\|_2^2 \\ &\geq \gamma_{j,r}^{(t,b)} + \frac{\eta}{Bm} \cdot (0.3|\mathcal{I}_{t,b} \cap S_+ \cap S_{-1}| - 0.7|\mathcal{I}_{t,b} \cap S_+ \cap S_1|) \cdot \|\boldsymbol{\mu}\|_2^2. \end{aligned}$$

865 Therefore, we have

$$\begin{aligned} \gamma_{j,r}^{(T_1,0)} &\geq \frac{\eta}{Bm} (0.3 \cdot c_3 T_1 \cdot c_4 H \cdot 0.25B - 0.7 T_1 n q) \|\boldsymbol{\mu}\|_2^2 \\ &= \frac{\eta}{Bm} (0.075 c_3 c_4 T_1 n - 0.7 T_1 n q) \|\boldsymbol{\mu}\|_2^2 \\ &\geq \frac{\eta}{16 B m} c_3 c_4 T_1 n \|\boldsymbol{\mu}\|_2^2 \\ &= \frac{c_3 c_4}{192} = \Omega(1). \end{aligned}$$

866

□

867 **Lemma C.7.** Suppose Condition 3.1 holds. Then we have that  $\|\mathbf{w}_{j,r}^{(T_1,0)}\|_2 = \Theta(\sigma_0 \sqrt{d})$  and

$$\begin{aligned} \langle \mathbf{w}_{j,r}^{(T_1,0)}, j\boldsymbol{\mu} \rangle &= \Omega(1), \\ \langle \mathbf{w}_{-j,r}^{(T_1,0)}, j\boldsymbol{\mu} \rangle &= -\Omega(1), \\ \hat{\beta} &:= 2 \max_{i,j,r} \{ |\langle \mathbf{w}_{j,r}^{(T_1,0)}, \boldsymbol{\mu} \rangle|, (P-1) |\langle \mathbf{w}_{j,r}^{(T_1,0)}, \boldsymbol{\xi}_i \rangle| \} = O(1). \end{aligned}$$

868 Besides, for  $S_i^{(t,b)}$  and  $S_{j,r}^{(t,b)}$  defined in Lemma A.3 and A.4, we have that

$$\begin{aligned} |S_i^{(T_1,0)}| &= \Omega(m), \forall i \in [n] \\ |S_{j,r}^{(T_1)}| &= \Omega(n), \forall j \in \{\pm 1\}, r \in [m]. \end{aligned}$$

869 *Proof of Theorem 4.1.* Recall that

$$\mathbf{w}_{j,r}^{(t,b)} = \mathbf{w}_{j,r}^{(0,0)} + j \cdot \gamma_{j,r}^{(t,b)} \cdot \|\boldsymbol{\mu}\|_2^{-2} \cdot \boldsymbol{\mu} + \frac{1}{P-1} \sum_{i=1}^n \rho_{j,r,i}^{(t,b)} \cdot \|\boldsymbol{\xi}_i\|_2^{-2} \cdot \boldsymbol{\xi}_i,$$

870 by triangle inequality we have

$$\left| \|\mathbf{w}_{j,r}^{(T_1,0)}\|_2 - \|\mathbf{w}_{j,r}^{(0,0)}\|_2 \right| \leq |\gamma_{j,r}^{(t,b)}| \cdot \|\boldsymbol{\mu}\|_2^{-1} + \frac{1}{P-1} \left\| \sum_{i=1}^n |\rho_{j,r,i}^{(t,b)}| \cdot \|\boldsymbol{\xi}_i\|_2^{-2} \cdot \boldsymbol{\xi}_i \right\|_2$$

$$\begin{aligned} &\leq \frac{1}{12} \|\boldsymbol{\mu}\|_2^{-1} + \frac{\sqrt{n}}{12(P-1)} (\sigma_p^2 d/2)^{-1/2} \\ &\leq \frac{1}{6} \|\boldsymbol{\mu}\|_2^{-1}. \end{aligned}$$

871 By the condition on  $\sigma_0$  and Lemma A.2, we have

$$\|\mathbf{w}_{j,r}^{(T_1,0)}\|_2 = \Theta(\|\mathbf{w}_{j,r}^{(0,0)}\|_2) = \Theta(\sigma_0 \sqrt{d}).$$

872 By taking the inner product with  $\boldsymbol{\mu}$  and  $\boldsymbol{\xi}_i$ , we can get

$$\langle \mathbf{w}_{j,r}^{(t,b)}, \boldsymbol{\mu} \rangle = \langle \mathbf{w}_{j,r}^{(0,0)}, \boldsymbol{\mu} \rangle + j \cdot \gamma_{j,r}^{(t,b)} + \frac{1}{P-1} \sum_{i=1}^n \rho_{j,r,i}^{(t,b)} \cdot \|\boldsymbol{\xi}_i\|_2^{-2} \cdot \langle \boldsymbol{\xi}_i, \boldsymbol{\mu} \rangle,$$

873 and

$$\begin{aligned} \langle \mathbf{w}_{j,r}^{(t,b)}, \boldsymbol{\xi}_i \rangle &= \langle \mathbf{w}_{j,r}^{(0,0)}, \boldsymbol{\xi}_i \rangle + j \cdot \gamma_{j,r}^{(t,b)} \cdot \|\boldsymbol{\mu}\|_2^{-2} \cdot \langle \boldsymbol{\mu}, \boldsymbol{\xi}_i \rangle + \frac{1}{P-1} \sum_{i'=1}^n \rho_{j,r,i'}^{(t,b)} \cdot \|\boldsymbol{\xi}_{i'}\|_2^{-2} \cdot \langle \boldsymbol{\xi}_{i'}, \boldsymbol{\xi}_i \rangle \\ &= \langle \mathbf{w}_{j,r}^{(0,0)}, \boldsymbol{\xi}_i \rangle + j \cdot \gamma_{j,r}^{(t,b)} \cdot \|\boldsymbol{\mu}\|_2^{-2} \cdot \langle \boldsymbol{\mu}, \boldsymbol{\xi}_i \rangle + \frac{1}{P-1} \rho_{j,r,i}^{(t,b)} + \frac{1}{P-1} \sum_{i' \neq i} \rho_{j,r,i'}^{(t,b)} \cdot \|\boldsymbol{\xi}_{i'}\|_2^{-2} \cdot \langle \boldsymbol{\xi}_{i'}, \boldsymbol{\xi}_i \rangle. \end{aligned}$$

874 Then, we have

$$\begin{aligned} \langle \mathbf{w}_{j,r}^{(T_1,0)}, j\boldsymbol{\mu} \rangle &= \langle \mathbf{w}_{j,r}^{(0,0)}, j\boldsymbol{\mu} \rangle + \gamma_{j,r}^{(T_1,0)} + \frac{1}{P-1} \sum_{i=1}^n \rho_{j,r,i}^{(T_1,0)} \cdot \|\boldsymbol{\xi}_i\|_2^{-2} \cdot \langle \boldsymbol{\xi}_i, j\boldsymbol{\mu} \rangle \\ &\geq \gamma_{j,r}^{(T_1,0)} - |\langle \mathbf{w}_{j,r}^{(0,0)}, \boldsymbol{\mu} \rangle| - \frac{1}{P-1} \sum_{i=1}^n |\rho_{j,r,i}^{(T_1,0)}| \cdot \|\boldsymbol{\xi}_i\|_2^{-2} \cdot |\langle \boldsymbol{\xi}_i, \boldsymbol{\mu} \rangle| \\ &\geq \gamma_{j,r}^{(T_1,0)} - \sqrt{2 \log(12m/\delta)} \cdot \sigma_0 \|\boldsymbol{\mu}\|_2 - \frac{n}{12(P-1)} (\sigma_0^2 d/2)^{-1} \|\boldsymbol{\mu}\|_2 \sigma_p \cdot \sqrt{2 \log(6n/\delta)} \\ &\geq \frac{1}{2} \gamma_{j,r}^{(T_1,0)}, \end{aligned}$$

875 and

$$\begin{aligned} \langle \mathbf{w}_{-j,r}^{(T_1,0)}, j\boldsymbol{\mu} \rangle &= \langle \mathbf{w}_{-j,r}^{(0,0)}, j\boldsymbol{\mu} \rangle - \gamma_{-j,r}^{(T_1,0)} - \frac{1}{P-1} \sum_{i=1}^n \rho_{-j,r,i}^{(T_1,0)} \cdot \|\boldsymbol{\xi}_i\|_2^{-2} \cdot \langle \boldsymbol{\xi}_i, j\boldsymbol{\mu} \rangle \\ &\leq -\gamma_{-j,r}^{(T_1,0)} + |\langle \mathbf{w}_{-j,r}^{(0,0)}, \boldsymbol{\mu} \rangle| + \frac{1}{P-1} \sum_{i=1}^n |\rho_{-j,r,i}^{(T_1,0)}| \cdot \|\boldsymbol{\xi}_i\|_2^{-2} \cdot |\langle \boldsymbol{\xi}_i, \boldsymbol{\mu} \rangle| \\ &\leq -\gamma_{-j,r}^{(T_1,0)} + \sqrt{2 \log(12m/\delta)} \cdot \sigma_0 \|\boldsymbol{\mu}\|_2 + \frac{n}{12(P-1)} (\sigma_0^2 d/2)^{-1} \|\boldsymbol{\mu}\|_2 \sigma_p \cdot \sqrt{2 \log(6n/\delta)} \\ &\leq -\frac{1}{2} \gamma_{j,r}^{(T_1,0)}, \end{aligned}$$

876 where the last inequality is by the condition on  $\sigma_0$  and  $\gamma_{j,r}^{(T_1,0)} = \Omega(1)$ . Thus, it follows that

$$\langle \mathbf{w}_{j,r}^{(T_1,0)}, j\boldsymbol{\mu} \rangle = \Omega(1), \quad \langle \mathbf{w}_{-j,r}^{(T_1,0)}, j\boldsymbol{\mu} \rangle = -\Omega(1).$$

877 By triangle inequality, we have

$$\begin{aligned} |\langle \mathbf{w}_{j,r}^{(T_1,0)}, \boldsymbol{\mu} \rangle| &\leq |\langle \mathbf{w}_{j,r}^{(0,0)}, \boldsymbol{\mu} \rangle| + |\gamma_{j,r}^{(T_1,0)}| + \frac{1}{P-1} \sum_{i=1}^n |\rho_{j,r,i}^{(t,b)}| \cdot \|\boldsymbol{\xi}_i\|_2^{-2} \cdot |\langle \boldsymbol{\xi}_i, \boldsymbol{\mu} \rangle| \\ &\leq \frac{1}{2} \beta + \frac{1}{12} + \frac{n}{P-1} \cdot \frac{1}{12} (\sigma_p^2 d/2)^{-1} \cdot \|\boldsymbol{\mu}\|_2 \sigma_p \cdot \sqrt{2 \log(6n/\delta)} \\ &= \frac{1}{2} \beta + \frac{1}{12} + \frac{n}{6(P-1)} \|\boldsymbol{\mu}\|_2 \sqrt{2 \log(6n/\delta)} / (\sigma_p d) \\ &\leq \frac{1}{6}, \end{aligned}$$

878 and

$$\begin{aligned}
|\langle \mathbf{w}_{j,r}^{(T_1,0)}, \boldsymbol{\xi}_i \rangle| &\leq |\langle \mathbf{w}_{j,r}^{(0,0)}, \boldsymbol{\xi}_i \rangle| + |\gamma_{j,r}^{(T_1,0)}| \cdot \|\boldsymbol{\mu}\|_2^{-2} \cdot |\langle \boldsymbol{\mu}, \boldsymbol{\xi}_i \rangle| + \frac{1}{P-1} |\rho_{j,r,i}^{(T_1,0)}| \\
&\quad + \frac{1}{P-1} \sum_{i \neq i'} |\rho_{j,r,i'}^{(T_1,0)}| \cdot \|\boldsymbol{\xi}_{i'}\|_2^{-2} \cdot |\langle \boldsymbol{\xi}_{i'}, \boldsymbol{\xi}_i \rangle| \\
&\leq \frac{1}{2} \beta + \frac{1}{12} \|\boldsymbol{\mu}\|_2^{-1} \sigma_p \cdot \sqrt{2 \log(6n/\delta)} + \frac{1}{12(P-1)} \\
&\quad + \frac{n}{12(P-1)} (\sigma_p^2 d/2)^{-1} 2\sigma_p^2 \cdot \sqrt{d \log(6n^2/\delta)} \\
&\leq \frac{1}{2} \beta + \frac{1}{12(P-1)} + \frac{1}{6} \|\boldsymbol{\mu}\|_2^{-1} \sigma_p \cdot \sqrt{\log(6n/\delta)} \\
&\leq \frac{1}{6}.
\end{aligned}$$

879 This leads to

$$\widehat{\beta} := 2 \max_{i,j,r} \{ |\langle \mathbf{w}_{j,r}^{(T_1,0)}, \boldsymbol{\mu} \rangle|, (P-1) |\langle \mathbf{w}_{j,r}^{(T_1,0)}, \boldsymbol{\xi}_i \rangle| \} = O(1).$$

880 And we also have for  $t \leq T_1$  and  $j = y_i$  that

$$\begin{aligned}
&\langle \mathbf{w}_{j,r}^{(t,b)}, \boldsymbol{\xi}_i \rangle - \langle \mathbf{w}_{j,r}^{(0,0)}, \boldsymbol{\xi}_i \rangle \\
&\geq \frac{1}{P-1} \rho_{j,r,i}^{(t,b)} - \gamma_{j,r}^{(t,b)} \cdot \|\boldsymbol{\mu}\|_2^{-2} \cdot |\langle \boldsymbol{\mu}, \boldsymbol{\xi}_i \rangle| - \frac{1}{P-1} \sum_{i \neq i'} |\rho_{j,r,i'}^{(t,b)}| \cdot \|\boldsymbol{\xi}_{i'}\|_2^{-2} \cdot |\langle \boldsymbol{\xi}_{i'}, \boldsymbol{\xi}_i \rangle| \\
&\geq -\gamma_{j,r}^{(t,b)} \cdot \|\boldsymbol{\mu}\|_2^{-2} \cdot |\langle \boldsymbol{\mu}, \boldsymbol{\xi}_i \rangle| - \frac{1}{P-1} \sum_{i \neq i'} |\rho_{j,r,i'}^{(t,b)}| \cdot \|\boldsymbol{\xi}_{i'}\|_2^{-2} \cdot |\langle \boldsymbol{\xi}_{i'}, \boldsymbol{\xi}_i \rangle| \\
&\geq -\frac{1}{12} \|\boldsymbol{\mu}\|_2^{-2} \cdot |\langle \boldsymbol{\mu}, \boldsymbol{\xi}_i \rangle| - \frac{n}{12(P-1)} \|\boldsymbol{\xi}_{i'}\|_2^{-2} \cdot |\langle \boldsymbol{\xi}_{i'}, \boldsymbol{\xi}_i \rangle| \\
&\geq -\frac{1}{12} \|\boldsymbol{\mu}\|_2^{-1} \sigma_p \cdot \sqrt{2 \log(6n/\delta)} - \frac{n}{12(P-1)} (\sigma_p^2 d/2)^{-1} 2\sigma_p^2 \cdot \sqrt{d \log(6n^2/\delta)} \\
&= -\frac{1}{12} \|\boldsymbol{\mu}\|_2^{-1} \sigma_p \cdot \sqrt{2 \log(6n/\delta)} - \frac{n}{3(P-1)} \sqrt{\log(6n^2/\delta)/d} \\
&\geq -\frac{1}{6} \|\boldsymbol{\mu}\|_2^{-1} \sigma_p \cdot \sqrt{\log(6n/\delta)}.
\end{aligned}$$

881 Now let  $\bar{S}_i^{(0,0)}$  denote  $\{r : \langle \mathbf{w}_{y_i,r}^{(0,0)}, \boldsymbol{\xi}_i \rangle > \sigma_0 \sigma_p \sqrt{d}\}$  and let  $\bar{S}_{j,r}^{(0,0)}$  denote  $\{i \in [n] : y_i =$   
882  $j, \langle \mathbf{w}_{y_i,r}^{(t,b)}, \boldsymbol{\xi}_i \rangle > \sigma_0 \sigma_p \sqrt{d}\}$ . By the condition on  $\sigma_0$ , we have for  $t \leq T_1$  that

$$\langle \mathbf{w}_{j,r}^{(t,b)}, \boldsymbol{\xi}_i \rangle \geq \frac{1}{\sqrt{2}} \langle \mathbf{w}_{j,r}^{(0,0)}, \boldsymbol{\xi}_i \rangle,$$

883 for any  $r \in \bar{S}_i^{(0,0)}$  or  $i \in \bar{S}_{j,r}^{(0,0)}$ . Therefore, we have  $\bar{S}_i^{(0,0)} \subseteq S_i^{(T_1,0)}$  and  $\bar{S}_{j,r}^{(0,0)} \subseteq S_{j,r}^{(T_1,0)}$  and hence

$$\begin{aligned}
0.8\Phi(-\sqrt{2})m &\leq |\bar{S}_i^{(0,0)}| \leq |S_i^{(T_1,0)}| = \Omega(m), \\
0.25\Phi(-\sqrt{2})n &\leq |\bar{S}_{j,r}^{(0,0)}| \leq |S_{j,r}^{(T_1,0)}| = \Omega(n),
\end{aligned}$$

884 where  $\Phi(\cdot)$  is the CDF of the standard normal distribution.  $\square$

885 Now we can give proof of Theorem 4.

886 *Proof of Theorem 4.* After the training process of SAM after  $T_1$ , we get  $\mathbf{W}^{(T_1,0)}$ . To differentiate  
887 the SAM process and SGD process. We use  $\widehat{\mathbf{W}}$  to denote the trajectory obtained by SAM in the  
888 proof, i.e.,  $\widehat{\mathbf{W}}^{(T_1,0)}$ . By Proposition C.2, we have that

$$\widetilde{\mathbf{w}}_{j,r}^{(T_1,0)} = \widetilde{\mathbf{w}}_{j,r}^{(0,0)} + j \cdot \widetilde{\gamma}_{j,r}^{(T_1,0)} \cdot \frac{\boldsymbol{\mu}}{\|\boldsymbol{\mu}\|_2^2} + \frac{1}{P-1} \sum_{i=1}^n \widetilde{\rho}_{j,r,i}^{(T_1,0)} \cdot \frac{\boldsymbol{\xi}_i}{\|\boldsymbol{\xi}_i\|_2^2} + \frac{1}{P-1} \sum_{i=1}^n \widetilde{\rho}_{j,r,i}^{(T_1,0)} \cdot \frac{\boldsymbol{\xi}_i}{\|\boldsymbol{\xi}_i\|_2^2} \quad (70)$$

where  $\gamma_{j,r}^{(T_1,0)} = \Theta(1)$ ,  $\tilde{\rho}_{j,r,i}^{(T_1,0)} \in [0, 1/12]$ ,  $\tilde{\rho}_{j,r,i}^{(T_1,0)} \in [-\beta - 10\sqrt{\log(6n^2/\delta)/dn}, 0]$ . Then the SGD start at  $\mathbf{W}^{(0,0)} := \tilde{\mathbf{W}}^{(T_1,0)}$ . Notice that by Lemma C.7, we know that the initial weights of SGD (i.e., the end weight of SAM)  $\mathbf{W}^{(0,0)}$  still satisfies the conditions for Subsection B.1 and B.2. Therefore, following the same analysis in Subsection B.1 and B.2, we have that there exist  $t = \tilde{O}(\eta^{-1}\epsilon^{-1}mnd^{-1}P^{-2}\sigma_p^{-2})$  such that  $L_S(\mathbf{W}^{(t,0)}) \leq \epsilon$ . Besides,

$$\mathbf{w}_{j,r}^{(t,0)} = \mathbf{w}_{j,r}^{(0,0)} + j \cdot \gamma_{j,r}^{(t,0)} \cdot \frac{\boldsymbol{\mu}}{\|\boldsymbol{\mu}\|_2^2} + \frac{1}{P-1} \sum_{i=1}^n \bar{\rho}_{j,r,i}^{(t,0)} \cdot \frac{\boldsymbol{\xi}_i}{\|\boldsymbol{\xi}_i\|_2^2} + \frac{1}{P-1} \sum_{i=1}^n \rho_{j,r,i}^{(t,0)} \cdot \frac{\boldsymbol{\xi}_i}{\|\boldsymbol{\xi}_i\|_2^2} \quad (71)$$

for  $j \in [\pm 1]$  and  $r \in [m]$  where

$$\gamma_{j,r}^{(t,0)} = \Theta(\text{SNR}^2) \sum_{i \in [n]} \bar{\rho}_{j,r,i}^{(t,0)}, \quad \bar{\rho}_{j,r,i}^{(t,0)} \in [0, \alpha], \quad \rho_{j,r,i}^{(t,0)} \in [-\alpha, 0]. \quad (72)$$

Next, we will evaluate the test error for  $\mathbf{W}^{(t,0)}$ . Notice that we use  $(t)$  as the shorthand notation of  $(t, 0)$ . For the sake of convenience, we use  $(\mathbf{x}, \hat{y}, y) \sim \mathcal{D}$  to denote the following: data point  $(\mathbf{x}, y)$  follows distribution  $\mathcal{D}$  defined in Definition 2.1, and  $\hat{y}$  is its true label. We can write out the test error as

$$\begin{aligned} & \mathbb{P}_{(\mathbf{x}, y) \sim \mathcal{D}}(y \neq \text{sign}(f(\mathbf{W}^{(t)}, \mathbf{x}))) \\ &= \mathbb{P}_{(\mathbf{x}, y) \sim \mathcal{D}}(yf(\mathbf{W}^{(t)}, \mathbf{x}) \leq 0) \\ &= \mathbb{P}_{(\mathbf{x}, y) \sim \mathcal{D}}(yf(\mathbf{W}^{(t)}, \mathbf{x}) \leq 0, y \neq \hat{y}) + \mathbb{P}_{(\mathbf{x}, \hat{y}, y) \sim \mathcal{D}}(yf(\mathbf{W}^{(t)}, \mathbf{x}) \leq 0, y = \hat{y}) \\ &= p \cdot \mathbb{P}_{(\mathbf{x}, \hat{y}, y) \sim \mathcal{D}}(\hat{y}f(\mathbf{W}^{(t)}, \mathbf{x}) \geq 0) + (1-p) \cdot \mathbb{P}_{(\mathbf{x}, \hat{y}, y) \sim \mathcal{D}}(\hat{y}f(\mathbf{W}^{(t)}, \mathbf{x}) \leq 0) \\ &\leq p + \mathbb{P}_{(\mathbf{x}, \hat{y}, y) \sim \mathcal{D}}(\hat{y}f(\mathbf{W}^{(t)}, \mathbf{x}) \leq 0), \end{aligned} \quad (73)$$

where in the second equation we used the definition of  $\mathcal{D}$  in Definition 2.1. It therefore suffices to provide an upper bound for  $\mathbb{P}_{(\mathbf{x}, \hat{y}) \sim \mathcal{D}}(\hat{y}f(\mathbf{W}^{(t)}, \mathbf{x}) \leq 0)$ . To achieve this, we write  $\mathbf{x} = (\hat{y}\boldsymbol{\mu}, \boldsymbol{\xi})$ , and get

$$\begin{aligned} \hat{y}f(\mathbf{W}^{(t)}, \mathbf{x}) &= \frac{1}{m} \sum_{j,r} \hat{y}j[\sigma(\langle \mathbf{w}_{j,r}^{(t)}, \hat{y}\boldsymbol{\mu} \rangle) + \sigma(\langle \mathbf{w}_{j,r}^{(t)}, \boldsymbol{\xi} \rangle)] \\ &= \frac{1}{m} \sum_r [\sigma(\langle \mathbf{w}_{\hat{y},r}^{(t)}, \hat{y}\boldsymbol{\mu} \rangle) + (P-1)\sigma(\langle \mathbf{w}_{\hat{y},r}^{(t)}, \boldsymbol{\xi} \rangle)] \\ &\quad - \frac{1}{m} \sum_r [\sigma(\langle \mathbf{w}_{-\hat{y},r}^{(t)}, \hat{y}\boldsymbol{\mu} \rangle) + (P-1)\sigma(\langle \mathbf{w}_{-\hat{y},r}^{(t)}, \boldsymbol{\xi} \rangle)] \end{aligned} \quad (74)$$

The inner product with  $j = \hat{y}$  can be bounded as

$$\begin{aligned} \langle \mathbf{w}_{\hat{y},r}^{(t)}, \hat{y}\boldsymbol{\mu} \rangle &= \langle \mathbf{w}_{\hat{y},r}^{(0)}, \hat{y}\boldsymbol{\mu} \rangle + \gamma_{\hat{y},r}^{(t)} + \frac{1}{(P-1)} \sum_{i=1}^n \bar{\rho}_{\hat{y},r,i}^{(t)} \cdot \|\boldsymbol{\xi}_i\|_2^{-2} \cdot \langle \boldsymbol{\xi}_i, \hat{y}\boldsymbol{\mu} \rangle + \frac{1}{(P-1)} \sum_{i=1}^n \rho_{\hat{y},r,i}^{(t)} \cdot \|\boldsymbol{\xi}_i\|_2^{-2} \cdot \langle \boldsymbol{\xi}_i, \hat{y}\boldsymbol{\mu} \rangle \\ &\geq \langle \mathbf{w}_{\hat{y},r}^{(0)}, \hat{y}\boldsymbol{\mu} \rangle + \gamma_{\hat{y},r}^{(t)} - \frac{\sqrt{2\log(6n/\delta)}}{P-1} \cdot \sigma_p \|\boldsymbol{\mu}\|_2 \cdot (\sigma_p^2 d/2)^{-1} \left[ \sum_{i=1}^n \bar{\rho}_{\hat{y},r,i}^{(t)} + \sum_{i=1}^n |\rho_{\hat{y},r,i}^{(t)}| \right] \\ &= \langle \mathbf{w}_{\hat{y},r}^{(0)}, \hat{y}\boldsymbol{\mu} \rangle + \gamma_{\hat{y},r}^{(t)} - \Theta(\sqrt{\log(n/\delta)} \cdot (P\sigma_p d)^{-1} \|\boldsymbol{\mu}\|_2) \cdot \Theta(\text{SNR}^{-2}) \cdot \gamma_{\hat{y},r}^{(t)} \\ &= \langle \mathbf{w}_{\hat{y},r}^{(0)}, \hat{y}\boldsymbol{\mu} \rangle + [1 - \Theta(\sqrt{\log(n/\delta)} \cdot P\sigma_p / \|\boldsymbol{\mu}\|_2)] \gamma_{\hat{y},r}^{(t)} \\ &= \langle \mathbf{w}_{\hat{y},r}^{(0)}, \hat{y}\boldsymbol{\mu} \rangle + \Theta(\gamma_{\hat{y},r}^{(t)}) \\ &= \Omega(1), \end{aligned} \quad (75)$$

where the inequality is by Lemma A.1; the second equality is obtained by plugging in the coefficient orders we summarized at (72); the third equality is by the condition  $\text{SNR} = \|\boldsymbol{\mu}\|_2 / P\sigma_p \sqrt{d}$ ; the fourth equality is due to  $\|\boldsymbol{\mu}\|_2^2 \geq C \cdot P^2 \sigma_p^2 \log(n/\delta)$  in Condition 3.1, so for sufficiently large constant  $C$  the equality holds; the last equality is by Lemma C.7. Moreover, we can deduce in a similar

907 manner that

$$\begin{aligned}
\langle \mathbf{w}_{-\hat{y},r}^{(t)}, \hat{y}\boldsymbol{\mu} \rangle &= \langle \mathbf{w}_{-\hat{y},r}^{(0)}, \hat{y}\boldsymbol{\mu} \rangle - \gamma_{-\hat{y},r}^{(t)} + \sum_{i=1}^n \bar{\rho}_{-\hat{y},r,i}^{(t)} \cdot \|\boldsymbol{\xi}_i\|_2^{-2} \cdot \langle \boldsymbol{\xi}_i, -\hat{y}\boldsymbol{\mu} \rangle + \sum_{i=1}^n \rho_{-\hat{y},r,i}^{(t)} \cdot \|\boldsymbol{\xi}_i\|_2^{-2} \cdot \langle \boldsymbol{\xi}_i, \hat{y}\boldsymbol{\mu} \rangle \\
&\leq \langle \mathbf{w}_{-\hat{y},r}^{(0)}, \hat{y}\boldsymbol{\mu} \rangle - \gamma_{-\hat{y},r}^{(t)} + \sqrt{2 \log(6n/\delta)} \cdot \sigma_p \|\boldsymbol{\mu}\|_2 \cdot (\sigma_p^2 d/2)^{-1} \left[ \sum_{i=1}^n \bar{\rho}_{-\hat{y},r,i}^{(t)} + \sum_{i=1}^n |\rho_{-\hat{y},r,i}^{(t)}| \right] \\
&= \langle \mathbf{w}_{-\hat{y},r}^{(0)}, \hat{y}\boldsymbol{\mu} \rangle - \Theta(\gamma_{-\hat{y},r}^{(t)}) \\
&= -\Omega(1) < 0,
\end{aligned} \tag{76}$$

908 where the second equality holds based on similar analyses as in (75).

909 Denote  $g(\boldsymbol{\xi})$  as  $\sum_r \sigma(\langle \mathbf{w}_{-\hat{y},r}^{(t)}, \boldsymbol{\xi} \rangle)$ . According to Theorem 5.2.2 in Vershynin (2018), we know that  
910 for any  $x \geq 0$  it holds that

$$\mathbb{P}(g(\boldsymbol{\xi}) - \mathbb{E}g(\boldsymbol{\xi}) \geq x) \leq \exp\left(-\frac{cx^2}{\sigma_p^2 \|g\|_{\text{Lip}}^2}\right), \tag{77}$$

911 where  $c$  is a constant. To calculate the Lipschitz norm, we have

$$\begin{aligned}
|g(\boldsymbol{\xi}) - g(\boldsymbol{\xi}')| &= \left| \sum_{r=1}^m \sigma(\langle \mathbf{w}_{-\hat{y},r}^{(t)}, \boldsymbol{\xi} \rangle) - \sum_{r=1}^m \sigma(\langle \mathbf{w}_{-\hat{y},r}^{(t)}, \boldsymbol{\xi}' \rangle) \right| \\
&\leq \sum_{r=1}^m |\sigma(\langle \mathbf{w}_{-\hat{y},r}^{(t)}, \boldsymbol{\xi} \rangle) - \sigma(\langle \mathbf{w}_{-\hat{y},r}^{(t)}, \boldsymbol{\xi}' \rangle)| \\
&\leq \sum_{r=1}^m |\langle \mathbf{w}_{-\hat{y},r}^{(t)}, \boldsymbol{\xi} - \boldsymbol{\xi}' \rangle| \\
&\leq \sum_{r=1}^m \|\mathbf{w}_{-\hat{y},r}^{(t)}\|_2 \cdot \|\boldsymbol{\xi} - \boldsymbol{\xi}'\|_2,
\end{aligned}$$

912 where the first inequality is by triangle inequality; the second inequality is by the property of ReLU;  
913 the last inequality is by Cauchy-Schwartz inequality. Therefore, we have

$$\|g\|_{\text{Lip}} \leq \sum_{r=1}^m \|\mathbf{w}_{-\hat{y},r}^{(t)}\|_2, \tag{78}$$

914 and since  $\langle \mathbf{w}_{-\hat{y},r}^{(t)}, \boldsymbol{\xi} \rangle \sim \mathcal{N}(0, \|\mathbf{w}_{-\hat{y},r}^{(t)}\|_2^2 \sigma_p^2)$ , we can get

$$\mathbb{E}g(\boldsymbol{\xi}) = \sum_{r=1}^m \mathbb{E}\sigma(\langle \mathbf{w}_{-\hat{y},r}^{(t)}, \boldsymbol{\xi} \rangle) = \sum_{r=1}^m \frac{\|\mathbf{w}_{-\hat{y},r}^{(t)}\|_2 \sigma_p}{\sqrt{2\pi}} = \frac{\sigma_p}{\sqrt{2\pi}} \sum_{r=1}^m \|\mathbf{w}_{-\hat{y},r}^{(t)}\|_2.$$

915 Next we seek to upper bound the 2-norm of  $\mathbf{w}_{j,r}^{(t)}$ . First, we tackle the noise section in the decomposi-  
916 tion, namely:

$$\begin{aligned}
&\left\| \sum_{i=1}^n \rho_{j,r,i}^{(t)} \cdot \|\boldsymbol{\xi}_i\|_2^{-2} \cdot \boldsymbol{\xi}_i \right\|_2^2 \\
&= \sum_{i=1}^n \rho_{j,r,i}^{(t)2} \cdot \|\boldsymbol{\xi}_i\|_2^{-2} + 2 \sum_{1 \leq i_1 < i_2 \leq n} \rho_{j,r,i_1}^{(t)} \rho_{j,r,i_2}^{(t)} \cdot \|\boldsymbol{\xi}_{i_1}\|_2^{-2} \cdot \|\boldsymbol{\xi}_{i_2}\|_2^{-2} \cdot \langle \boldsymbol{\xi}_{i_1}, \boldsymbol{\xi}_{i_2} \rangle \\
&\leq 4\sigma_p^{-2} d^{-1} \sum_{i=1}^n \rho_{j,r,i}^{(t)2} + 2 \sum_{1 \leq i_1 < i_2 \leq n} |\rho_{j,r,i_1}^{(t)} \rho_{j,r,i_2}^{(t)}| \cdot (16\sigma_p^{-4} d^{-2}) \cdot (2\sigma_p^2 \sqrt{d \log(6n^2/\delta)}) \\
&= 4\sigma_p^{-2} d^{-1} \sum_{i=1}^n \rho_{j,r,i}^{(t)2} + 32\sigma_p^{-2} d^{-3/2} \sqrt{\log(6n^2/\delta)} \left[ \left( \sum_{i=1}^n |\rho_{j,r,i}^{(t)}| \right)^2 - \sum_{i=1}^n \rho_{j,r,i}^{(t)2} \right]
\end{aligned}$$

$$\begin{aligned}
&= \Theta(\sigma_p^{-2} d^{-1}) \sum_{i=1}^n \rho_{j,r,i}^{(t)2} + \tilde{\Theta}(\sigma_p^{-2} d^{-3/2}) \left( \sum_{i=1}^n |\rho_{j,r,i}^{(t)}| \right)^2 \\
&\leq [\Theta(\sigma_p^{-2} d^{-1} n^{-1}) + \tilde{\Theta}(\sigma_p^{-2} d^{-3/2})] \left( \sum_{i=1}^n |\bar{\rho}_{j,r,i}^{(t)}| + \sum_{i=1}^n |\rho_{j,r,i}^{(t)}| \right)^2 \\
&\leq \Theta(\sigma_p^{-2} d^{-1} n^{-1}) \left( \sum_{i=1}^n \bar{\rho}_{j,r,i}^{(t)} \right)^2
\end{aligned}$$

917 where for the first inequality we used Lemma A.1; for the second inequality we used the definition of  
918  $\bar{\rho}, \rho$ ; for the second to last equation we plugged in coefficient orders. We can thus upper bound the  
919 norm of  $\mathbf{w}_{j,r}^{(t)}$  as:

$$\begin{aligned}
\|\mathbf{w}_{j,r}^{(t)}\|_2 &\leq \|\mathbf{w}_{j,r}^{(0)}\|_2 + \gamma_{j,r}^{(t)} \cdot \|\boldsymbol{\mu}\|_2^{-1} + \frac{1}{P-1} \left\| \sum_{i=1}^n \rho_{j,r,i}^{(t)} \cdot \|\boldsymbol{\xi}_i\|_2^{-2} \cdot \boldsymbol{\xi}_i \right\|_2 \\
&\leq \|\mathbf{w}_{j,r}^{(0)}\|_2 + \gamma_{j,r}^{(t)} \cdot \|\boldsymbol{\mu}\|_2^{-1} + \Theta(P^{-1} \sigma_p^{-1} d^{-1/2} n^{-1/2}) \cdot \sum_{i=1}^n \bar{\rho}_{j,r,i}^{(t)} \\
&= \Theta(\sigma_0 \sqrt{d}) + \Theta(P^{-1} \sigma_p^{-1} d^{-1/2} n^{-1/2}) \cdot \sum_{i=1}^n \bar{\rho}_{j,r,i}^{(t)}, \tag{79}
\end{aligned}$$

920 where the first inequality is due to the triangle inequality, and the equality is due to the following  
921 comparisons:

$$\begin{aligned}
\frac{\gamma_{j,r}^{(t)} \cdot \|\boldsymbol{\mu}\|_2^{-1}}{\Theta(P^{-1} \sigma_p^{-1} d^{-1/2} n^{-1/2}) \cdot \sum_{i=1}^n \bar{\rho}_{j,r,i}^{(t)}} &= \Theta(P^{-1} \sigma_p d^{1/2} n^{1/2} \|\boldsymbol{\mu}\|_2^{-1} \text{SNR}^2) \\
&= \Theta(P^{-1} \sigma_p^{-1} d^{-1/2} n^{1/2} \|\boldsymbol{\mu}\|_2) \\
&= O(1)
\end{aligned}$$

922 based on the coefficient order  $\sum_{i=1}^n \bar{\rho}_{j,r,i}^{(t)} / \gamma_{j,r}^{(t)} = \Theta(\text{SNR}^{-2})$ , the definition  $\text{SNR} = \|\boldsymbol{\mu}\|_2 / (\sigma_p \sqrt{d})$ ,  
923 and the condition for  $d$  in Condition 3.1; and also  $\|\mathbf{w}_{j,r}^{(0)}\|_2 = \Theta(\sigma_0 \sqrt{d})$  based on Lemma C.7. With  
924 this and (75), we analyze the key component in (83):

$$\begin{aligned}
\frac{\sum_r \sigma(\langle \mathbf{w}_{\hat{y},r}^{(t)}, \hat{y} \boldsymbol{\mu} \rangle)}{(P-1) \sigma_p \sum_{r=1}^m \|\mathbf{w}_{-\hat{y},r}^{(t)}\|_2} &\geq \frac{\Theta(1)}{\Theta(\sigma_0 \sqrt{d}) + \Theta(P^{-1} \sigma_p^{-1} d^{-1/2} n^{-1/2}) \cdot \sum_{i=1}^n \bar{\rho}_{j,r,i}^{(t)}} \\
&\geq \frac{\Theta(1)}{\Theta(\sigma_0 \sqrt{d}) + O(P^{-1} \sigma_p^{-1} d^{-1/2} n^{1/2} \alpha)} \\
&\geq \min\{\Omega(\sigma_0^{-1} d^{-1/2}), \Omega(P \sigma_p d^{1/2} n^{-1/2} \alpha^{-1})\} \\
&\geq 1.
\end{aligned} \tag{80}$$

925 It directly follows that

$$\sum_r \sigma(\langle \mathbf{w}_{\hat{y},r}^{(t)}, \hat{y} \boldsymbol{\mu} \rangle) - \frac{(P-1) \sigma_p}{\sqrt{2\pi}} \sum_{r=1}^m \|\mathbf{w}_{-\hat{y},r}^{(t)}\|_2 > 0. \tag{81}$$

926 Now using the method in (77) with the results above, we plug (76) into (74) and then (73), to obtain

$$\begin{aligned}
&\mathbb{P}_{(\mathbf{x}, \hat{y}, y) \sim \mathcal{D}}(\hat{y} f(\mathbf{W}^{(t)}, \mathbf{x}) \leq 0) \\
&\leq \mathbb{P}_{(\mathbf{x}, \hat{y}, y) \sim \mathcal{D}} \left( \sum_r \sigma(\langle \mathbf{w}_{-\hat{y},r}^{(t)}, \boldsymbol{\xi} \rangle) \geq (1/(P-1)) \sum_r \sigma(\langle \mathbf{w}_{\hat{y},r}^{(t)}, \hat{y} \boldsymbol{\mu} \rangle) \right) \\
&= \mathbb{P}_{(\mathbf{x}, \hat{y}, y) \sim \mathcal{D}} \left( g(\boldsymbol{\xi}) - \mathbb{E}g(\boldsymbol{\xi}) \geq (1/(P-1)) \sum_r \sigma(\langle \mathbf{w}_{\hat{y},r}^{(t)}, \hat{y} \boldsymbol{\mu} \rangle) - \frac{\sigma_p}{\sqrt{2\pi}} \sum_{r=1}^m \|\mathbf{w}_{-\hat{y},r}^{(t)}\|_2 \right)
\end{aligned} \tag{82}$$



Table 1: ImageNet accuracy of ResNet-50 when we vary the starting point of using the SAM update rule, baseline result is 76.4%.

| $\tau$ | 10%  | 30%  | 50%  | 70%  | 90%  |
|--------|------|------|------|------|------|
| 0.01   | 76.9 | 76.9 | 76.9 | 76.7 | 76.7 |
| 0.02   | 77.1 | 77.0 | 76.9 | 76.8 | 76.6 |
| 0.05   | 76.2 | 76.4 | 76.3 | 76.3 | 76.2 |

$$\begin{aligned}
&\leq \exp \left[ - \frac{c \left( (1/(P-1)) \sum_r \sigma(\langle \mathbf{w}_{\hat{y},r}^{(t)}, \hat{\mathbf{y}}\boldsymbol{\mu} \rangle) - (\sigma_p/\sqrt{2\pi}) \sum_{r=1}^m \|\mathbf{w}_{-\hat{y},r}^{(t)}\|_2 \right)^2}{\sigma_p^2 \left( \sum_{r=1}^m \|\mathbf{w}_{-\hat{y},r}^{(t)}\|_2 \right)^2} \right] \\
&= \exp \left[ - c \left( \frac{\sum_r \sigma(\langle \mathbf{w}_{\hat{y},r}^{(t)}, \hat{\mathbf{y}}\boldsymbol{\mu} \rangle)}{(P-1)\sigma_p \sum_{r=1}^m \|\mathbf{w}_{-\hat{y},r}^{(t)}\|_2} - 1/\sqrt{2\pi} \right)^2 \right] \\
&\leq \exp(c/2\pi) \exp \left( - 0.5c \left( \frac{\sum_r \sigma(\langle \mathbf{w}_{\hat{y},r}^{(t)}, \hat{\mathbf{y}}\boldsymbol{\mu} \rangle)}{(P-1)\sigma_p \sum_{r=1}^m \|\mathbf{w}_{-\hat{y},r}^{(t)}\|_2} \right)^2 \right) \tag{83}
\end{aligned}$$

where the second inequality is by (81) and plugging (78) into (77), the third inequality is due to the fact that  $(s-t)^2 \geq s^2/2 - t^2, \forall s, t \geq 0$ .

And we can get from (80) and (83) that

$$\begin{aligned}
\mathbb{P}_{(\mathbf{x}, \hat{y}, y) \sim \mathcal{D}} (\hat{y}f(\mathbf{W}^{(t)}, \mathbf{x}) \leq 0) &\leq \exp(c/2\pi) \exp \left( - 0.5c \left( \frac{\sum_r \sigma(\langle \mathbf{w}_{\hat{y},r}^{(t)}, \hat{\mathbf{y}}\boldsymbol{\mu} \rangle)}{(P-1)\sigma_p \sum_{r=1}^m \|\mathbf{w}_{-\hat{y},r}^{(t)}\|_2} \right)^2 \right) \\
&\leq \exp \left( \frac{c}{2\pi} - C \min\{\sigma_0^{-2}d^{-1}, P\sigma_p^2dn^{-1}\alpha^{-2}\} \right) \\
&\leq \exp \left( - 0.5C \min\{\sigma_0^{-2}d^{-1}, P\sigma_p^2dn^{-1}\alpha^{-2}\} \right) \\
&\leq \epsilon,
\end{aligned}$$

where  $C = O(1)$ , the last inequality holds since  $\sigma_0^2 \leq 0.5Cd^{-1}\log(1/\epsilon)$  and  $d \geq 2C^{-1}P^{-1}\sigma_p^{-2}n\alpha^2\log(1/\epsilon)$ .

□

## D Additional Experiments

In this section, we provide the experiments on real data sets.

**Varying different starting points for SAM** In section 4, we show that the SAM algorithm can effectively prevent noise memorization and thus improve weak feature learning. Is SAM also effective if we add the algorithm at the end of the training? We conduct experiments on the ImageNet dataset with ResNet50. We choose the batch size as 1024 and the model is train for 90 epochs with the best learning rate in grid search  $\{0.01, 0.03, 0.1, 0.3\}$ . The learning rate schedule is 10k steps linear warmup then cosine decay. As shown in Table D, the earlier SAM is introduced, the more pronounced its effectiveness becomes.

**SAM with additive noises** Here, we conduct experiments on the CIFAR dataset with WRN-16-8. We add Gaussian random noises to the image data with variance  $\{0.1, 0.3, 1\}$ . We choose the batch size as 128 and train the model over 200 epochs using a learning rate of 0.1, a momentum of 0.9, and a weight decay of  $5e-4$ . The SAM hyperparameter is chosen as  $\tau = 2.0$ . As we can see from Table 2, SAM can consistently prevent noise learning and get better performance, compared to the SGD, vary from different additive noises level.

Table 2: CIFAR accuracy of wide ResNet when adding different level of Gaussian noise.

| Model    | Noise                 | Dataset   | Optimizer | Accuracy |
|----------|-----------------------|-----------|-----------|----------|
| WRN-16-8 | -                     | CIFAR-10  | SGD       | 96.69    |
| WRN-16-8 | -                     | CIFAR-10  | SAM       | 97.19    |
| WRN-16-8 | $\mathcal{N}(0, 0.1)$ | CIFAR-10  | SGD       | 95.87    |
| WRN-16-8 | $\mathcal{N}(0, 0.1)$ | CIFAR-10  | SAM       | 96.57    |
| WRN-16-8 | $\mathcal{N}(0, 0.3)$ | CIFAR-10  | SGD       | 92.40    |
| WRN-16-8 | $\mathcal{N}(0, 0.3)$ | CIFAR-10  | SAM       | 93.37    |
| WRN-16-8 | $\mathcal{N}(0, 1)$   | CIFAR-10  | SGD       | 79.50    |
| WRN-16-8 | $\mathcal{N}(0, 1)$   | CIFAR-10  | SAM       | 80.37    |
| WRN-16-8 | -                     | CIFAR-100 | SGD       | 81.93    |
| WRN-16-8 | -                     | CIFAR-100 | SAM       | 83.68    |
